# Supplementary material for: Organosulfur Materials with High Photo- and Photo-Oxidation Stability: 10-Anthryl Sulfoxides and Sulfones and Their Photophysical Properties Dependent on the Sulfur Oxidation State
Source: MDPI journal article supplement (doi:10.3390/ma14133506), 2021-06-23
Supplement: s1 [file s1]

# Supplementary Materials (SM)

## Organosulfur Materials with High Photo- and Photo-oxidation Stability: 10-Anthryl Sulfoxides and Sulfones and Their Photophysical Properties Dependent on the Sulfur Oxidation State

Piotr Bałczewski <sup>1,2,\*</sup>, Emilia Kowalska <sup>1</sup>, Ewa Różycka-Sokołowska <sup>2</sup>, Paweł Uznański <sup>3</sup>, Joanna Wilk <sup>1</sup>, Marek Koprowski <sup>1</sup>, Krzysztof Owsianik <sup>1</sup> and Bernard Marciniak <sup>2</sup>

<sup>1</sup> Centre of Molecular and Macromolecular Studies, Functional Materials Synthesis Group, Division of Organic Chemistry, Polish Academy of Sciences, Sienkiewicza 112, 90-363 Łódź, Poland; kowala88@vp.pl (E.K.); jskalik@cbmm.lodz.pl (J.W.); mkopr@cbmm.lodz.pl (M.K.); owsianik@cbmm.lodz.pl (K.O.)

<sup>2</sup> Structural & Material Chemistry Group, Faculty of Science and Technology, Institute of Chemistry, Jan Długosz University in Częstochowa, Armii Krajowej 13/15, 42-200 Częstochowa, Poland; e.sokolowska@ujd.edu.pl (E.R.-S.); b.marciniak@ujd.edu.pl (B.M.)

<sup>3</sup> Centre of Molecular and Macromolecular Studies, Division of Polymers, Polish Academy of Sciences, Sienkiewicza 112, 90-363 Łódź, Poland; puznansk@cbmm.lodz.pl

\* Correspondence: pbalczew@cbmm.lodz.pl

### Table of contents

|                                                                                                                                                                                                                                            |         |
|--------------------------------------------------------------------------------------------------------------------------------------------------------------------------------------------------------------------------------------------|---------|
| Synthetic procedures and spectroscopic data                                                                                                                                                                                                | S1-S4   |
| <sup>1</sup> H NMR and <sup>13</sup> C NMR spectra                                                                                                                                                                                         | S5-S26  |
| Optical properties                                                                                                                                                                                                                         | S27-S32 |
| Photostability and photo-oxidation stability                                                                                                                                                                                               | S33-S53 |
| HRMS APCI spectra                                                                                                                                                                                                                          | S54-S80 |
| Cartesian coordinates and total energies for the geometries of <b>1a</b> , <b>1b</b> , <b>1c</b> , <b>1d</b> , <b>2a</b> , <b>2b</b> , <b>2c</b> , <b>2d</b> , <b>3a</b> , <b>3b</b> , <b>3c</b> and <b>3d</b> optimized using Gaussian 09 | S81-S94 |
| References                                                                                                                                                                                                                                 | S94     |

### Synthetic procedures and spectroscopic data

**General:** *m*-Chloroperbenzoic acid (m-CPBA, ≥77%) was purchased from Aldrich. Dry and oxygen free dichloromethane (DCM, JT Baker Chemicals) was taken from MB SPS-800 (MBRAUN Solvent Purification System). The <sup>1</sup>H NMR and <sup>13</sup>C NMR spectra were measured with a Bruker AV 200 or AV 500 spectrometers in CDCl<sub>3</sub> with chemical shifts (δ) given in ppm relative to TMS as an internal standard. High-resolution mass spectrometry (HRMS) measurements were performed using Synapt G2-Si mass spectrometer (Waters) equipped with an APCI source and quadrupole-Time-of-Flight mass analyzer. The mass spectrometer was operated in the positive ion detection mode with discharge current set at 4.0 μA. The heated capillary temperature was 350 °C. The results of the measurements were processed using the MassLynx 4.1 software (Waters) incorporated with the instrument. Accurate mass measurements were performed by a peak matching technique using perfluorokerosene as an internal standard at a resolving power of 10.000 (10% valley definition). The HR(MS\_MS)-(+)-APCI spectra were recorded at 15 eV, 25 eV and 35 eV. Melting points were measured using Boetius apparatus. Thin layer chromatography (TLC) was performed on precoated Merck 60 (F<sub>254</sub> 60) silica gel plates with fluorescent indicator, with detection by means of UV light at 254 and 360 nm. Column chromatography was done on Merck silica gel

(Kieselgel 60, 230-400 mesh). IR spectra were carried out with a FT-IR spectrometer ATI Mattson model Infinity AR60 in KBr pellets and reported in  $\text{cm}^{-1}$ . The UV-Vis absorption spectra were recorded in 1 cm cuvettes on a Shimadzu UV-2700 spectrophotometer using two types of the light source: deuterium lamp D2 64604 and halogen lamp W1 L6380 (220 - 600 nm). Room temperature, steady-state emission spectra were obtained with the Horiba Jobin Yvon, Fluorolog-3 spectrofluorimeter using xenon lamp as a light source. The fluorescence quantum yields  $\Phi$  of the obtained compounds were determined in EtOH and toluene on excitation at their absorption maximum using an integrating sphere (Horiba, Jobin Yvon, Quanta- $\phi$  F-3029 Integrating sphere). Fluorescence lifetime values were measured by the Time Correlated Single Photon Counting (TCSPC) analysis. The fluorescence decay curves were obtained by exciting the molecules at their emission maximum using NanoLED laser at  $374 \text{ nm} \pm 10 \text{ nm}$  ( $< 200 \text{ ps}$ ) as a light source. The photodegradation measurements were investigated by monitoring the absorbance decay of  $10^{-5}$  ethanolic solutions in a quartz cuvette stored in the dark at room temperature, under ambient atmosphere ( $\text{O}_2$ ) and inert atmosphere ( $\text{Ar}$ ), and then exposed to UVP-Hg-Pen-ray lamp (254 nm,  $16.33 \text{ mW/cm}^2$  at distance 1 cm) and fluorescent lamp VL-6.LC (6W), 365 nm,  $27.4 \text{ mW/cm}^2$  at distance 1 cm).

### Synthesis of sulfides 1

To a solution of appropriate diarylmethyl thioethers (1.1 mmol) in dry EtOH (10 mL),  $\text{FeCl}_3$  (1.21 mmol, 1.1 equiv.) and KI (1.21 mmol, 1.1 equiv.) were added. The mixture was refluxed until disappearance of the starting material (monitoring by TLC). After completion of the reaction, the solvent was removed. To the crude product, ethyl acetate (10 mL) was added and the resulting mixture was poured onto saturated solution of  $\text{Na}_2\text{S}_2\text{O}_3\text{aq}$  (10 mL). The organic layer was dried over anhydrous  $\text{MgSO}_4$ . The solvent was evaporated to give products (**1a-d**), which were purified using a gradient column chromatography (petroleum: acetone, 10:1 v/v).<sup>1</sup>

### Synthesis of sulfoxides 2

*meta*-Chloroperbenzoic acid (33 mg, 0.196 mmol, 1 equiv.) was added to a solution of **1** (0.196 mmol, 1 equiv.) in  $\text{CH}_2\text{Cl}_2$  (20 mL) at  $0^\circ\text{C}$  and the resulting solution was heated to reflux under argon atmosphere overnight in the dark. Next, the reaction mixture was stirred overnight in the dark, then poured onto saturated aqueous solution of sodium bicarbonate/ice, and finally extracted with  $\text{CH}_2\text{Cl}_2$  (2x20 mL). The combined organic layers were dried over anhydrous  $\text{MgSO}_4$ , filtered, and concentrated to afford orange solids. Purification was carried out with column chromatography (hexanes/Et $_2\text{O}$ , 1:1) to afford yellow solids of **2**.

### Synthesis of sulfones 3

*m*-Chloroperbenzoic acid (66 mg, 0.392 mmol, 2 equiv.) was added to a solution of **1** (0.196 mmol, 1 equiv.) in  $\text{CH}_2\text{Cl}_2$  (20 mL) at  $0^\circ\text{C}$  and the resulting mixture was heated to reflux overnight in the dark under argon atmosphere. After this time, the reaction mixture was poured onto saturated aqueous solution of sodium bicarbonate/ice, and then extracted with  $\text{CH}_2\text{Cl}_2$  (2x20 mL). The organic layers were combined, dried over anhydrous  $\text{MgSO}_4$ , filtered, and concentrated to afford orange solids. Purification by column chromatography (hexanes/Et $_2\text{O}$ , 1:1) afforded yellow solids of **3**.

#### 7,8,9-Trimethoxy-5-(phenylthio)anthra[2,3-d][1,3]dioxole (**1a**)

Yield: 62% as an yellow solid, m.p.  $140^\circ\text{C}$ ;  $^1\text{H}$  NMR (200 MHz,  $\text{CDCl}_3$ ):  $\delta$  = 3.89 (s, 3H,  $\text{OCH}_3$ ), 3.99 (s, 3H,  $\text{OCH}_3$ ), 4.13 (s, 3H,  $\text{OCH}_3$ ), 6.01 (s, 2H,  $\text{OCH}_2\text{O}$ ), 6.89-7.16 (5H, m,  $5\times\text{H}_{\text{Ar}}$ ,  $\text{C}_6\text{H}_5$ ), 7.23 (s, 1H,  $\text{H}_{\text{Ar}}$ ), 7.76 (s, 1H,  $\text{H}_{\text{Ar}}$ ), 7.98 (s, 1H,  $\text{H}_{\text{Ar}}$ ), 8.53 (s, 1H,  $\text{H}_{\text{Ar}}$ );  $^{13}\text{C}$  NMR (50 MHz,  $\text{CDCl}_3$ ):  $\delta$  = 54.54, 59.90, 60.23, 98.86, 99.92, 100.52, 102.21, 119.97, 121.09, 122.05, 123.65, 125.00, 126.99, 127.59, 130.76, 132.38, 136.93, 145.69, 145.93, 148.31, 152.49; MS (EI, 70 eV):  $m/z$  (%): 420 (100,  $\text{M}^+$ ), 374 (30,  $\text{M}^+$ ,  $-\text{OCH}_2\text{O}$ ); MS (CI, isobutane):  $m/z$  (%) 420 (100,  $\text{M}^+$ ) 374 (10,  $\text{M}^+$ ,  $-\text{OCH}_2\text{O}$ ); HRMS (EI, 70 eV):  $m/z$  Calcd. for  $\text{C}_{24}\text{H}_{20}\text{O}_5\text{S}$ : 420.1032; Found: 420.1030; Elemental analysis: Found: C, 68.32; H, 4.95; S, 7.59. Calc. for  $\text{C}_{24}\text{H}_{20}\text{O}_5\text{S}$ : C, 68.55; H, 4.79; S, 7.63 %.

#### 7,8,9-Trimethoxy-5-(naphth-2-ylthio)anthra[2,3-d][1,3]dioxole (**1b**)

Yield: 51% as an yellow solid; m.p.  $92^\circ\text{C}$ ;  $^1\text{H}$  NMR (500 MHz,  $\text{C}_6\text{D}_6$ ):  $\delta$  = 3.37 (s, 3H,  $\text{OCH}_3$ ), 3.80 (s, 3H,  $\text{OCH}_3$ ), 3.95 (s, 3H,  $\text{OCH}_3$ ), 5.13 (s, 2H,  $\text{OCH}_2\text{O}$ ), 6.98-7.06 (m, 2H,  $2\times\text{H}_{\text{Ar}}$ , 6,7-naphth), 7.09-7.11 (m, 2H,  $2\times\text{H}_{\text{Ar}}$ ), 7.22 (dabd,  $^3J_{\text{HHAB}} = 8.5$ ,  $^4J_{\text{HH}} = 2.0 \text{ Hz}$ , 1H,  $\text{H}_{\text{Ar}}$ ), 7.29 (dab,  $^3J_{\text{HHAB}} = 8.5 \text{ Hz}$ , 1H,  $2\times\text{H}_{\text{Ar}}$ ), 7.37 (d,  $^3J_{\text{HH}} = 8.5 \text{ Hz}$ , 1H,  $\text{H}_{\text{Ar}}$ ), 7.51 (d,  $^4J_{\text{HH}} = 1.0 \text{ Hz}$ , 1H,  $\text{H}_{\text{Ar}}$ ), 8.12 (s, 1H,  $\text{H}_{\text{Ar}}$ ), 8.47 (s, 1H,  $\text{H}_{\text{Ar}}$ ), 8.83 (s, 1H,  $\text{H}_{\text{Ar}}$ );  $^{13}\text{C}$  NMR (50 MHz,  $\text{C}_6\text{D}_6$ ):  $\delta$  = 54.97, 60.62, 60.98, 100.30, 100.90, 101.91, 103.73, 121.31, 123.19, 124.00, 124.93,

125.11, 126.40, 127.02, 127.68, 128.85, 131.64, 132.76, 134.21, 136.25, 147.58, 150.12, 154.76; MS (EI, 70 eV)  $m/z$  (%): 470 (100,  $M^+$ ), 423 (32,  $M^+$ , -OCH<sub>2</sub>O); MS (CI, isobutane):  $m/z$  (%) 470 (80,  $M^+$ ); HRMS (EI, 70 eV):  $m/z$  Calcd for C<sub>28</sub>H<sub>22</sub>O<sub>5</sub>S: 470.1188; Found: 470.1184; Elemental analysis: Found: C, 71.54; H, 4.97; S, 6.75. Calc. for C<sub>28</sub>H<sub>22</sub>O<sub>5</sub>S: C, 71.47; H, 4.71; S, 6.81 %.

**7-Methoxy-5-(naphth-2-ylthio)anthra[2,3-d][1,3]dioxole (1c)**

Yield: 50% as an yellow solid; m.p. >200°C; <sup>1</sup>H NMR (500 MHz, CDCl<sub>3</sub>): δ = 3.84 (s, 3H, OCH<sub>3</sub>), 6.02 (s, 2H, OCH<sub>2</sub>O), 7.14 (dd, <sup>3</sup>J = 9.0, <sup>4</sup>J<sub>HH</sub> = 2.5 Hz, 2H, Hz, 2xH<sub>Ar</sub>), 7.23 (s, 1H, H<sub>Ar</sub>), 7.32 (s, 1H, H<sub>Ar</sub>), 7.33-7.35 (m, 2H, 2xH<sub>Ar</sub>, 6,7-naphth), 7.47-7.49 (m, 1H, H<sub>Ar</sub>, 5-naphth), 7.60 (d, <sup>3</sup>J = 8.5 Hz, 1H, H<sub>Ar</sub>), 7.68-7.70 (m, 1H, H<sub>Ar</sub>, 8-naphth), 7.86 (d, <sup>3</sup>J = 9.0 Hz, 1H, H<sub>Ar</sub>), 7.99 (d, <sup>4</sup>J<sub>HH</sub> = 2.0 Hz, 1H, H<sub>Ar</sub>), 8.07 (s, 1H, H<sub>Ar</sub>), 8.30 (s, 1H, H<sub>Ar</sub>); <sup>13</sup>C NMR (125 MHz, CDCl<sub>3</sub>): δ = 55.43, 101.38, 101.96, 103.02, 103.33, 119.85, 121.11, 129.98, 125.13, 125.25, 126.49, 127.01, 127.64, 127.78, 128.35, 128.59, 128.82, 130.23, 131.43, 133.92, 134.43, 135.72, 135.99, 147.35, 149.98, 158.55; MS (EI, 70 eV)  $m/z$  (%): 410 (100,  $M^+$ ); HRMS (EI, 70 eV):  $m/z$  Calcd. for C<sub>26</sub>H<sub>18</sub>O<sub>5</sub>S: 410.0977; Found: 410.0984; Elemental analysis: Found: C, 75.81; H, 4.72; S 8.05. Calc. for C<sub>26</sub>H<sub>18</sub>O<sub>5</sub>S: C, 76.08; H, 4.42; S, 7.81 %.

**5-(4-Methoxyphenylthio)anthra[2,3-d:6,7-d']bis[1,3]dioxole (1d)**

Yield: 52% as an yellow solid; m.p. >200°C; <sup>1</sup>H NMR (200 MHz, CDCl<sub>3</sub>): δ = 3.69 (s, 3H, OCH<sub>3</sub>), 6.03 (s, 4H, 2xOCH<sub>2</sub>O), 6.68 (d<sub>AB</sub>, <sup>3</sup>J<sub>HHAB</sub> = 9.0 Hz, 2H, 2x *o*-C<sub>6</sub>H<sub>4</sub>-OMe), 6.91 (d<sub>AB</sub>, <sup>3</sup>J<sub>HHAB</sub> = 9.0 Hz, 2H, 2x *m*-C<sub>6</sub>H<sub>4</sub>-OMe), 7.15 (s, 2H, 2xH<sub>Ar</sub>), 8.07 (s, 2H, 2xH<sub>Ar</sub>), 8.08 (s, 1H, H<sub>Ar</sub>); <sup>13</sup>C NMR (50 MHz, CDCl<sub>3</sub>): δ = 55.27, 101.16, 102.11, 102.68, 114.66, 123.40, 127.03, 128.04, 128.83, 132.51, 147.34, 149.01, 157.61; MS (EI, 70 eV)  $m/z$  (%): 404 (100,  $M^+$ ), 389 (23,  $M^+$ , -Me), 372 (12,  $M^+$ , -MeOH); HRMS (EI, 70 eV):  $m/z$  Calcd for C<sub>23</sub>H<sub>16</sub>O<sub>5</sub>S: 404.0719; Found: 404.0720; Elemental analysis: Found: C, 68.19; H, 3.86; S, 8.02. Calc. for C<sub>23</sub>H<sub>16</sub>O<sub>5</sub>S: C, 68.30; H, 3.99; S, 7.93 %.

**7,8,9-Trimethoxy-5-(phenylsulfinyl)anthra[2,3-d][1,3]dioxole (2a)**

Yield: 55%, yellow solid, m.p. 194-196°C; <sup>1</sup>H NMR (CDCl<sub>3</sub>, 200 MHz): δ = 3.86 (s, 3H, OCH<sub>3</sub>), 3.94 (s, 3H, OCH<sub>3</sub>), 4.08 (s, 3H, OCH<sub>3</sub>), 6.05 (s, 2H, OCH<sub>2</sub>O), 7.22 (s, 1H, H<sub>Ar</sub>), 7.31-7.40 (m, 3H, 3xH<sub>Ar</sub>, *m*-C<sub>6</sub>H<sub>5</sub>, *p*-C<sub>6</sub>H<sub>5</sub>), 7.46-7.55 (m, 2H, 2xH<sub>Ar</sub>), 7.81 (s, 1H, H<sub>Ar</sub>), 8.08 (s, 1H, H<sub>Ar</sub>), 8.56 (s, 1H, H<sub>Ar</sub>) ppm; <sup>13</sup>C NMR (CDCl<sub>3</sub>, 125 MHz): δ = 56.00, 61.23, 61.60, 97.39, 98.56, 101.52, 103.90 (s, 2xCH<sub>Ar</sub>), 123.49, 124.43 (s, 2xCH<sub>Ar</sub>), 125.32 (s, 2xC<sub>Ar</sub>), 127.91, 128.15, 128.52, 128.95 (s, 2xCH<sub>Ar</sub>), 129.69, 139.93, 144.79, 147.17 (s, 2xC<sub>Ar</sub>), 150.03, 154.28 ppm; MS (EI, 70 eV)  $m/z$  (%): 436 [ $M^+$ , 100], 420 [ $M^+$ , -O, 52], 388 [ $M^+$ , -HOCH<sub>2</sub>OH, 30], 359 [ $M^+$ , -C<sub>6</sub>H<sub>5</sub>, 51]; HRMS (EI, 70 eV):  $m/z$  [ $M$ ]<sup>+</sup> Calcd for C<sub>24</sub>H<sub>20</sub>O<sub>6</sub>S: 436.0981; Found: 436.0981; IR (KBr) cm<sup>-1</sup>: 3443, 3062, 2935, 2836, 1625, 1542, 1479, 1464, 1415, 1338, 1250, 1223, 1109, 1038, 1004, 955, 896, 830, 749, 694.

**7,8,9-Trimethoxy-5-(naphth-2-yl-sulfinyl)anthra[2,3-d][1,3]dioxole (2b)**

Yield: 42%, yellow solid, m.p. 186-188°C; <sup>1</sup>H NMR (CDCl<sub>3</sub>, 200 MHz): δ = 3.84 (s, 3H, OCH<sub>3</sub>), 3.92 (s, 3H, OCH<sub>3</sub>), 4.07 (s, 3H, OCH<sub>3</sub>), 6.00-6.08 (m, 2H, OCH<sub>2</sub>O), 7.17 (dd, <sup>3</sup>J<sub>HH</sub> = 10.0, <sup>4</sup>J<sub>HH</sub> = 2.0 Hz, 1H, H<sub>Ar</sub>), 7.24 (d, <sup>4</sup>J<sub>HH</sub> = 2.0 Hz, 1H, H<sub>Ar</sub>), 7.44-7.53 (m, 2H, 2xH<sub>Ar</sub>, 6,7-naphth), 7.54 (s, 1H, H<sub>Ar</sub>), 7.68-7.81 (m, 1H, H<sub>Ar</sub>), 7.88-7.93 (m, 1H, H<sub>Ar</sub>), 7.91 (s, 1H, H<sub>Ar</sub>), 8.17 (s, 1H, H<sub>Ar</sub>), 8.34 (s, 1H, H<sub>Ar</sub>), 8.57 (s, 1H, H<sub>Ar</sub>) ppm; <sup>13</sup>C NMR (CDCl<sub>3</sub>, 125 MHz): δ = 55.95, 61.21, 61.61, 97.39, 98.58, 101.53, 103.94 (2xCH<sub>Ar</sub>), 120.74, 123.52, 124.51, 125.42, 127.26, 127.41 (2xCH<sub>Ar</sub>), 127.98, 128.13 (2xCH<sub>Ar</sub>), 128.32, 129.09, 132.84, 133.62, 139.93, 141.86, 147.20 (2xC<sub>Ar</sub>), 150.76, 154.22 ppm; MS (EI, 70 eV)  $m/z$  (%): 486 [ $M^+$ , 31], 470 [ $M^+$ , -O, 100], 424 [ $M^+$ , -HOCH<sub>2</sub>OH, 48]; HRMS (EI, 70 eV):  $m/z$  [ $M$ ]<sup>+</sup> Calcd for C<sub>28</sub>H<sub>22</sub>O<sub>6</sub>: 486.1137; Found: 486.1139; IR (KBr) cm<sup>-1</sup>: 3435, 3055, 2933, 1622, 1542, 1480, 1463, 1415, 1339, 1247, 1222, 1110, 1069, 1037, 1003, 954, 898, 808, 746, 699.

**7-Methoxy-5-(naphth-2-yl-sulfinyl)anthra[2,3-d][1,3]dioxole (2c)**

Yield: 36%, yellow solid, m.p. 174-176°C; <sup>1</sup>H NMR (CDCl<sub>3</sub>, 500 MHz): δ = 3.83 (s, 3H, OCH<sub>3</sub>), 6.03 (s, 1H, OCH<sub>2</sub>O), 6.06 (s, 1H, OCH<sub>2</sub>O), 7.08 (d, <sup>3</sup>J<sub>HH</sub> = 8.4 Hz, 1H, H<sub>Ar</sub>), 7.18 (dd, <sup>3</sup>J<sub>HH</sub> = 8.7, <sup>4</sup>J<sub>HH</sub> = 1.8 Hz, 1H, H<sub>Ar</sub>), 7.20 (s, 1H, H<sub>Ar</sub>), 7.49-7.56 (m, 2H, 6,7-Naphth), 7.69 (d, 1H, <sup>3</sup>J<sub>HH</sub> = 8.7 Hz, 1H, H<sub>Ar</sub>), 7.78 (dd, <sup>3</sup>J<sub>HH</sub> = 7.7, <sup>4</sup>J<sub>HH</sub> = 1.3 Hz, 1H, H<sub>Ar</sub>), 7.81 (d, <sup>3</sup>J<sub>HH</sub> = 9.3 Hz, 1H, H<sub>Ar</sub>), 7.90 (dd, <sup>3</sup>J<sub>HH</sub> = 7.6, <sup>4</sup>J<sub>HH</sub> = 1.2 Hz, 1H, H<sub>Ar</sub>), 8.10 (d, <sup>4</sup>J<sub>HH</sub> = 2.0 Hz, 1H, H<sub>Ar</sub>), 8.22 (s, 1H, H<sub>Ar</sub>), 8.28 (s, 1H, H<sub>Ar</sub>), 8.38 (d, <sup>4</sup>J<sub>HH</sub> = 1.0 Hz, 1H, H<sub>Ar</sub>) ppm; <sup>13</sup>C NMR (CDCl<sub>3</sub>, 125 MHz): δ = 55.42, 98.72, 100.04, 101.55, 103.58 (2xCH<sub>Ar</sub>), 119.98, 120.74, 124.57, 127.05, 127.22, 127.38, 127.81, 127.90, 127.96, 128.13, 128.34, 129.07, 130.31, 131.47, 132.85, 133.61, 141.86, 147.13, 150.25, 158.52; MS (EI, 70 eV)  $m/z$  (%): 426 [ $M^+$ , 42], 378 [ $M^+$ , -OCH<sub>2</sub>O, 100], 299 [ $M^+$ , -C<sub>10</sub>H<sub>7</sub>, 15], 268 [ $M^+$ , -C<sub>10</sub>H<sub>7</sub>, -OCH<sub>3</sub>, 25]; HRMS (EI, 70 eV):  $m/z$  [ $M$ ]<sup>+</sup> Calcd for C<sub>26</sub>H<sub>18</sub>O<sub>4</sub>S: 426.0926; Found: 426.0919; IR (KBr) cm<sup>-1</sup>: 3437, 3051, 2921, 1626, 1460, 1378, 1281, 1255, 1221, 1194, 1122, 1066, 1033, 953, 896, 817, 747, 654.

**5-(4-Methoxyphenylsulfinyl)-anthra[2,3-d:6,7-d']bis[1,3]dioxole (2d)**

Yield: 32%, yellow solid, m.p. 176-178°C (decomp.); <sup>1</sup>H NMR (CDCl<sub>3</sub>, 200 MHz): δ = 3.75 (s, 3H, OCH<sub>3</sub>), 6.02 (s, 4H, 2xOCH<sub>2</sub>O), 6.86 (d, <sup>3</sup>J<sub>HH</sub> = 9.0 Hz, 2H, 2xH<sub>Ar</sub>, 2x *o*-C<sub>6</sub>H<sub>4</sub>-OMe), 7.12 (s, 2H, 2xH<sub>Ar</sub>), 7.24 (s, 1H, H<sub>Ar</sub>), 7.38 (d, <sup>3</sup>J<sub>HH</sub> = 9.0 Hz, 2H, 2xH<sub>Ar</sub>, 2x *m*-C<sub>6</sub>H<sub>4</sub>-OMe), 8.09 (s, 2H, 2xH<sub>Ar</sub>) ppm; <sup>13</sup>C NMR (CDCl<sub>3</sub>, 125 MHz): δ = 55.43, 98.90, 101.44 (2xCH<sub>2</sub>), 103.10 (2xCH<sub>Ar</sub>), 114.60 (2xCH<sub>Ar</sub>), 126.07 (2xCH<sub>Ar</sub>), 128.83, 129.69, 129.76 (2xCH<sub>Ar</sub>), 135.57 (2xCH<sub>Ar</sub>), 147.35 (4xC<sub>Ar</sub>), 149.27, 160.86 ppm; MS (EI, 70 eV) *m/z* (%): 420 [M<sup>+</sup>, 16], 404 [M<sup>+</sup>, -O, 100], 372 [M<sup>+</sup>, -MeOH, 70]; HRMS (EI, 70 eV): *m/z* [M]<sup>+</sup> Calcd for C<sub>23</sub>H<sub>16</sub>O<sub>6</sub>S: 420.0668; Found: 420.0668; IR (KBr) cm<sup>-1</sup>: 3432, 2917, 1593, 1494, 1460, 1300, 1229, 1085, 1038, 952, 893, 827, 733.

**7-Methoxy-5-(naphth-2-yl-sulfonyl)anthra[2,3-d][1,3]dioxole (3c)**

Yield: 26%, yellow solid, m.p. 172-174°C (decomp.); <sup>1</sup>H NMR (CDCl<sub>3</sub>, 500 MHz): δ = 3.92 (s, 3H, OCH<sub>3</sub>), 6.07 (s, 2H, OCH<sub>2</sub>O), 7.11 (dd, <sup>3</sup>J<sub>HH</sub> = 9.1, <sup>4</sup>J<sub>HH</sub> = 2.3 Hz, 1H, H<sub>Ar</sub>), 7.18 (s, 1H, H<sub>Ar</sub>), 7.54-7.61 (m, 2H, 2xH<sub>Ar</sub>), 7.72 (dabd, <sup>3</sup>J<sub>HHAB</sub> = 8.7, <sup>4</sup>J<sub>HH</sub> = 1.8 Hz, 1H, H<sub>Ar</sub>), 7.79 (d, <sup>5</sup>J<sub>HH</sub> = 0.3 Hz, 1H, H<sub>Ar</sub>), 7.80 (d, <sup>5</sup>J<sub>HH</sub> = 0.5 Hz, 1H, H<sub>Ar</sub>), 7.81 (dabdd, <sup>3</sup>J<sub>HHAB</sub> = 8.7, <sup>4</sup>J<sub>HH</sub> = 2.5, <sup>4</sup>J<sub>HH</sub> = 0.5 Hz, 1H, H<sub>Ar</sub>), 7.92 (dd, <sup>3</sup>J<sub>HH</sub> = 7.0, <sup>4</sup>J<sub>HH</sub> = 2.0 Hz, 1H, H<sub>Ar</sub>), 8.36 (s, 1H, H<sub>Ar</sub>), 8.56-8.57 (m, 1H, H<sub>Ar</sub>), 8.65 (d, <sup>4</sup>J<sub>HH</sub> = 2.1 Hz, 1H, H<sub>Ar</sub>), 8.86 (dd, <sup>5</sup>J<sub>HH</sub> = 0.4, <sup>5</sup>J<sub>HH</sub> = 0.7 Hz, 1H, H<sub>Ar</sub>) ppm; <sup>13</sup>C NMR (CDCl<sub>3</sub>, 125 MHz): δ = 55.42, 100.78, 101.73, 102.02, 103.63, 119.64, 121.47, 124.69, 126.63, 126.92, 127.59, 127.95, 127.99, 128.77, 129.31, 129.43, 130.55, 130.73, 131.88, 131.96, 134.73, 134.84, 141.14, 146.70, 151.14, 159.16 ppm; MS (EI, 70 eV) *m/z* (%): 442 [M<sup>+</sup>, 68], 377 [M<sup>+</sup>, -SO<sub>2</sub>, 34], 347 [M<sup>+</sup>, -SO<sub>2</sub>, -OCH<sub>3</sub>, 100]; HRMS (EI, 70 eV): *m/z* [M]<sup>+</sup> Calcd for C<sub>26</sub>H<sub>18</sub>O<sub>5</sub>S: 442.0875; Found: 442.0864; IR (KBr) cm<sup>-1</sup>: 3437, 3057, 2909, 1626, 1479, 1462, 1378, 1350, 1303, 1280, 1245, 1222, 1195, 1146, 1127, 1070, 1040, 953, 902, 864, 818, 749, 668, 650, 573.

**5-(4-Methoxyphenylsulfonyl)-anthra[2,3-d:6,7-d']bis[1,3]dioxole (3d)**

Yield: 17%, yellow solid, m.p. 195-198°C (decomp.); <sup>1</sup>H NMR (CDCl<sub>3</sub>, 200 MHz): δ = 3.77 (s, 3H, OCH<sub>3</sub>), 6.05 (s, 4H, OCH<sub>2</sub>O), 6.86 (d, <sup>3</sup>J<sub>HH</sub> = 8.0 Hz, 2H, 2xH<sub>Ar</sub>, 2x *o*-C<sub>6</sub>H<sub>4</sub>-OMe), 7.09 (s, 2H, 2xH<sub>Ar</sub>), 7.82 (d, <sup>3</sup>J<sub>HH</sub> = 8.0 Hz, 2H, 2xH<sub>Ar</sub>, 2x *m*-C<sub>6</sub>H<sub>4</sub>-OMe), 8.16 (s, 1H, H<sub>Ar</sub>), 8.70 (s, 2H, 2x H<sub>Ar</sub>) ppm; <sup>13</sup>C NMR (CDCl<sub>3</sub>, 125 MHz): δ = 55.58, 101.04 (2xCH<sub>Ar</sub>), 101.61 (2xCH<sub>Ar</sub>), 103.08 (2xCH<sub>Ar</sub>), 114.23 (2xCH<sub>Ar</sub>), 127.35, 127.99 (2xCH<sub>Ar</sub>), 128.52, 128.75 (2xC<sub>Ar</sub>), 132.83 (2xC<sub>Ar</sub>), 135.88, 146.88 (2xC<sub>Ar</sub>), 150.16 (2xC<sub>Ar</sub>), 162.82 ppm; MS (EI, 70 eV) *m/z* (%): 436 [M<sup>+</sup>, 100], 372 [M<sup>+</sup>, -SO<sub>2</sub>, 43], 342 [M<sup>+</sup>, -2xOCH<sub>2</sub>OH 78]; HRMS (EI, 70 eV): *m/z* [M]<sup>+</sup> Calcd for C<sub>23</sub>H<sub>16</sub>O<sub>7</sub>S: 436.0617; Found: 436.0610; IR (KBr) cm<sup>-1</sup>: 3434, 2905, 1620, 1592, 1500, 1460, 1378, 1303, 1265, 1232, 1149, 1087, 1035, 952, 877, 837, 735, 676, 574.

# <sup>1</sup>H NMR and <sup>13</sup>C NMR spectra

**Figure S1.** <sup>1</sup>H NMR and <sup>13</sup>C NMR spectra of the obtained compounds.

## <sup>1</sup>H NMR of 1a

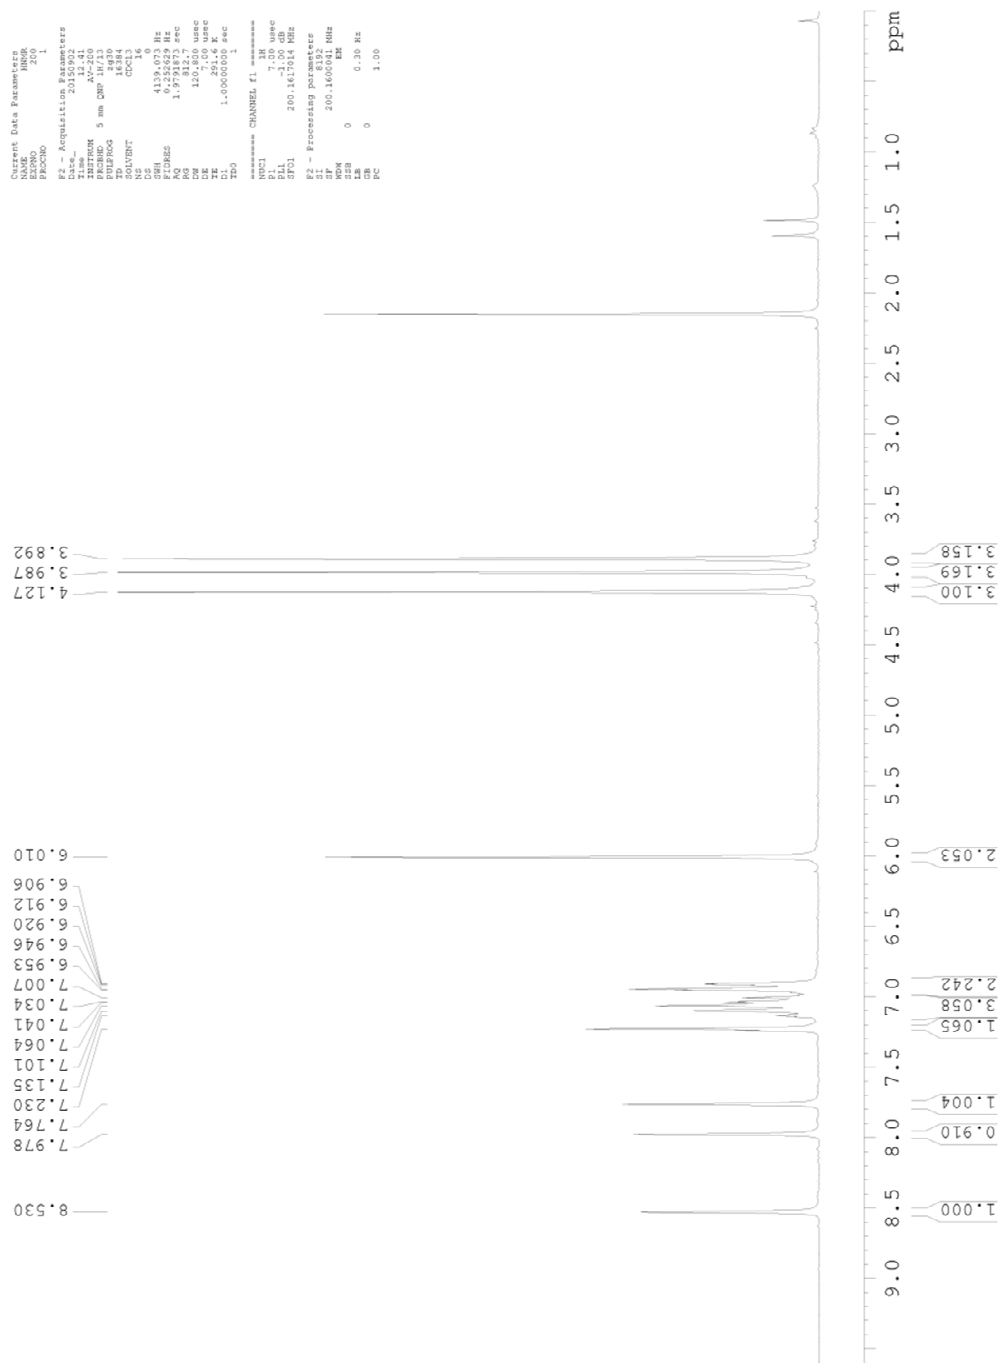

# <sup>13</sup>C NMR of 1a

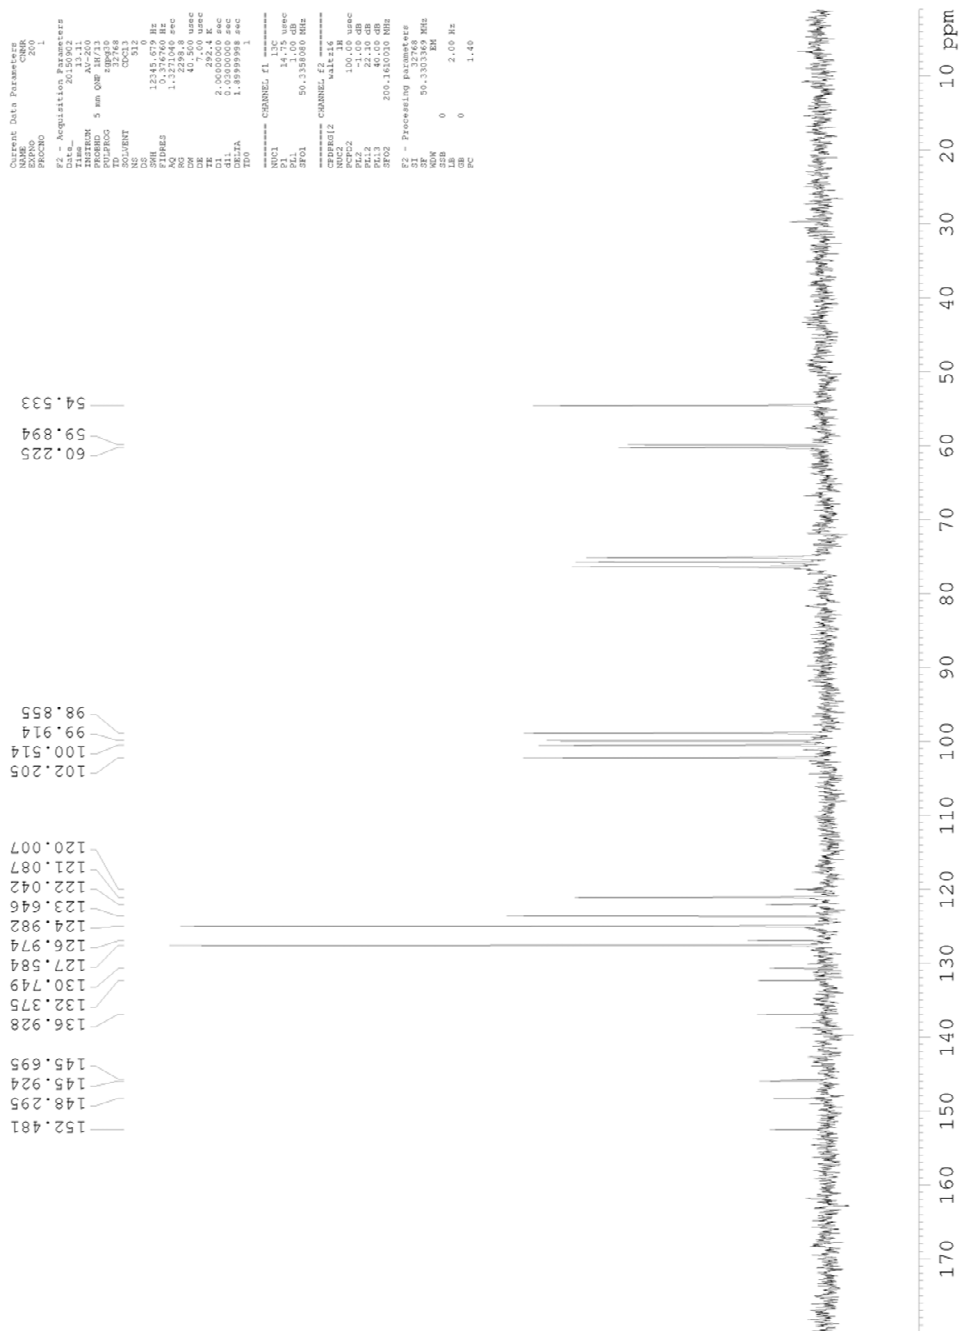

## S7

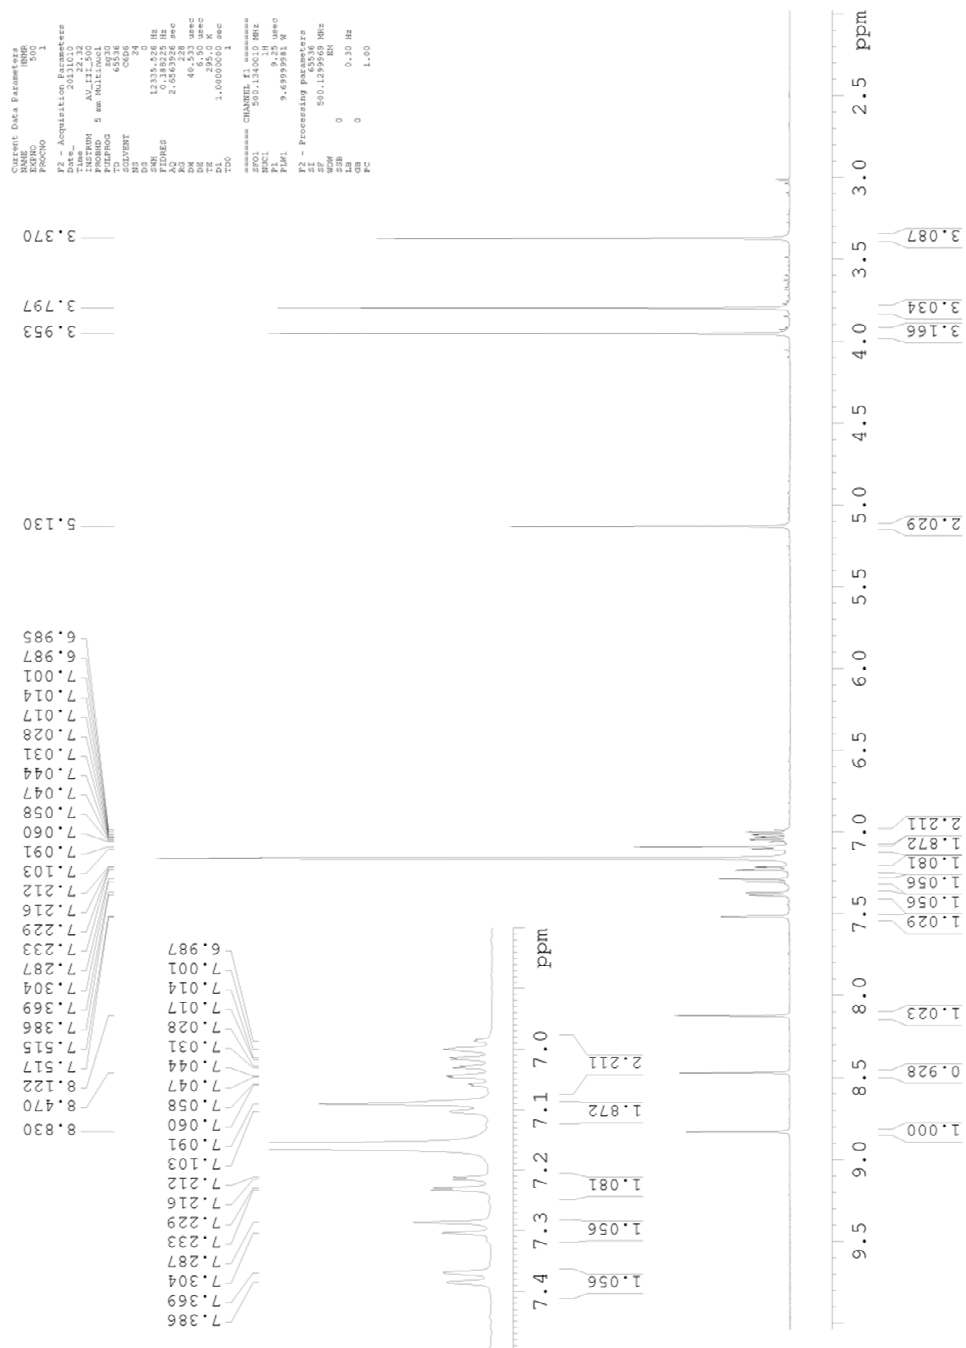

S8

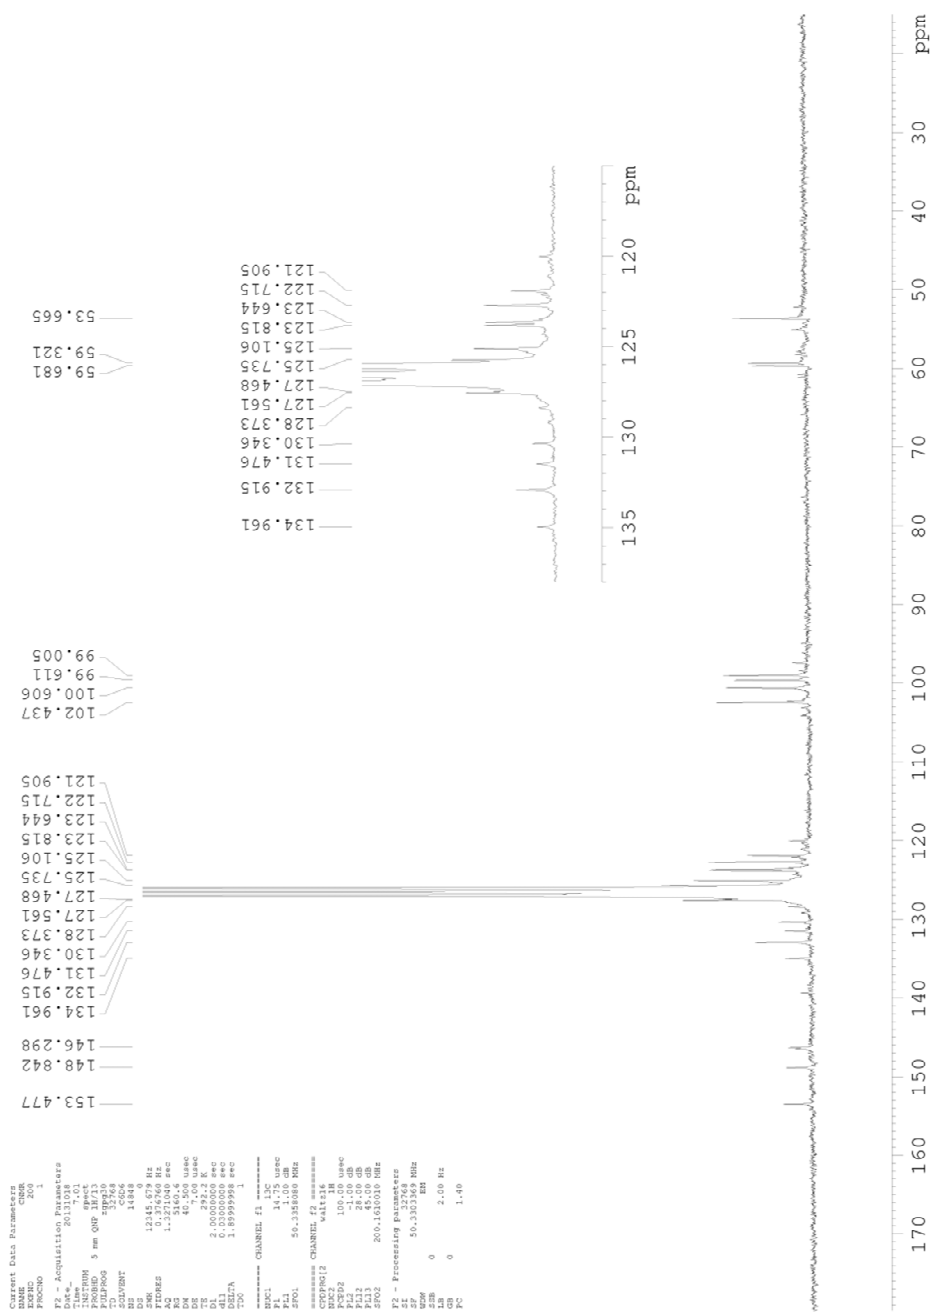

# <sup>1</sup>H NMR of 1c

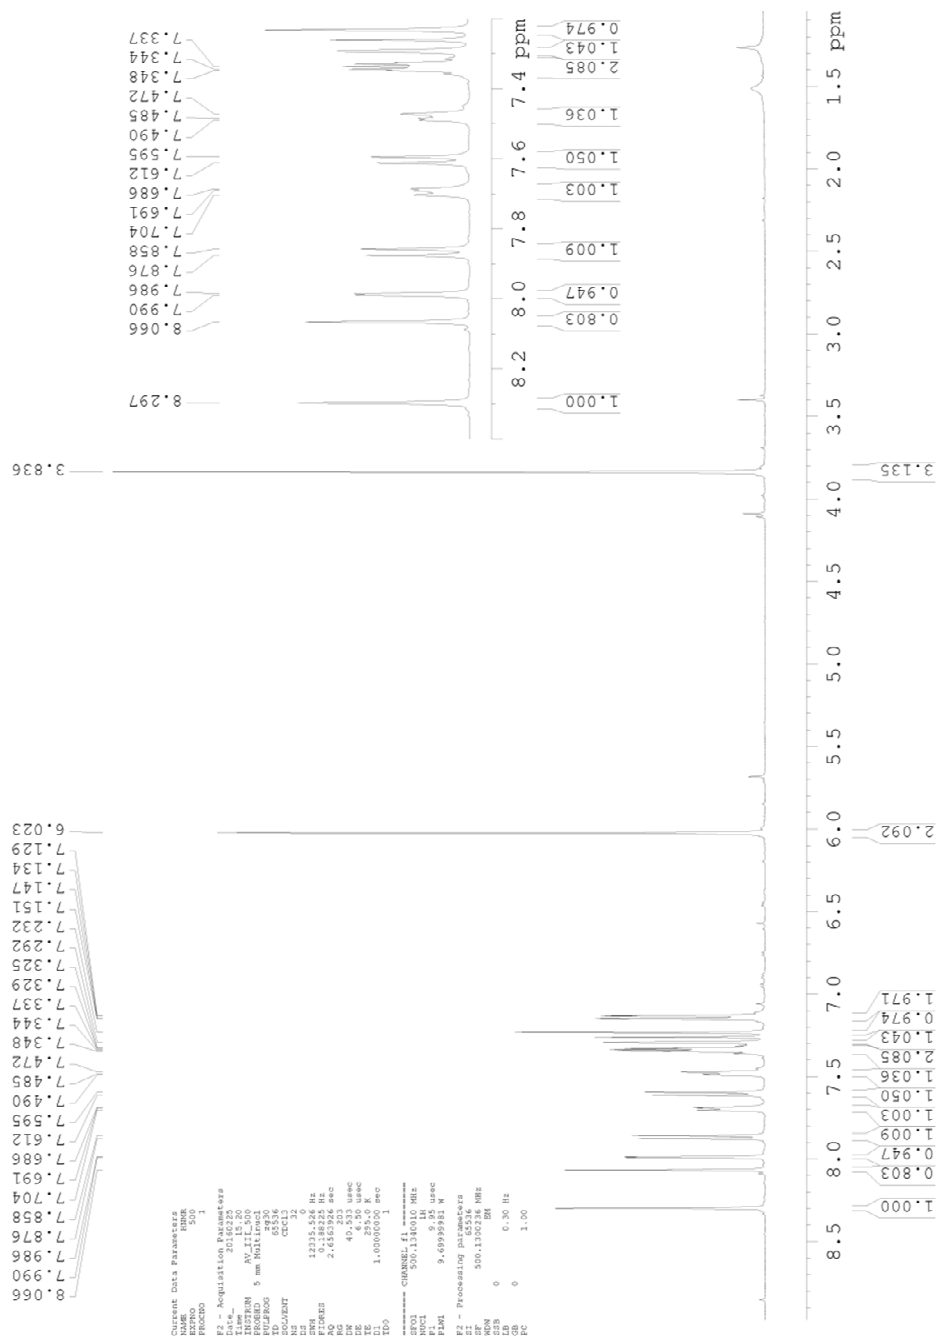

S10

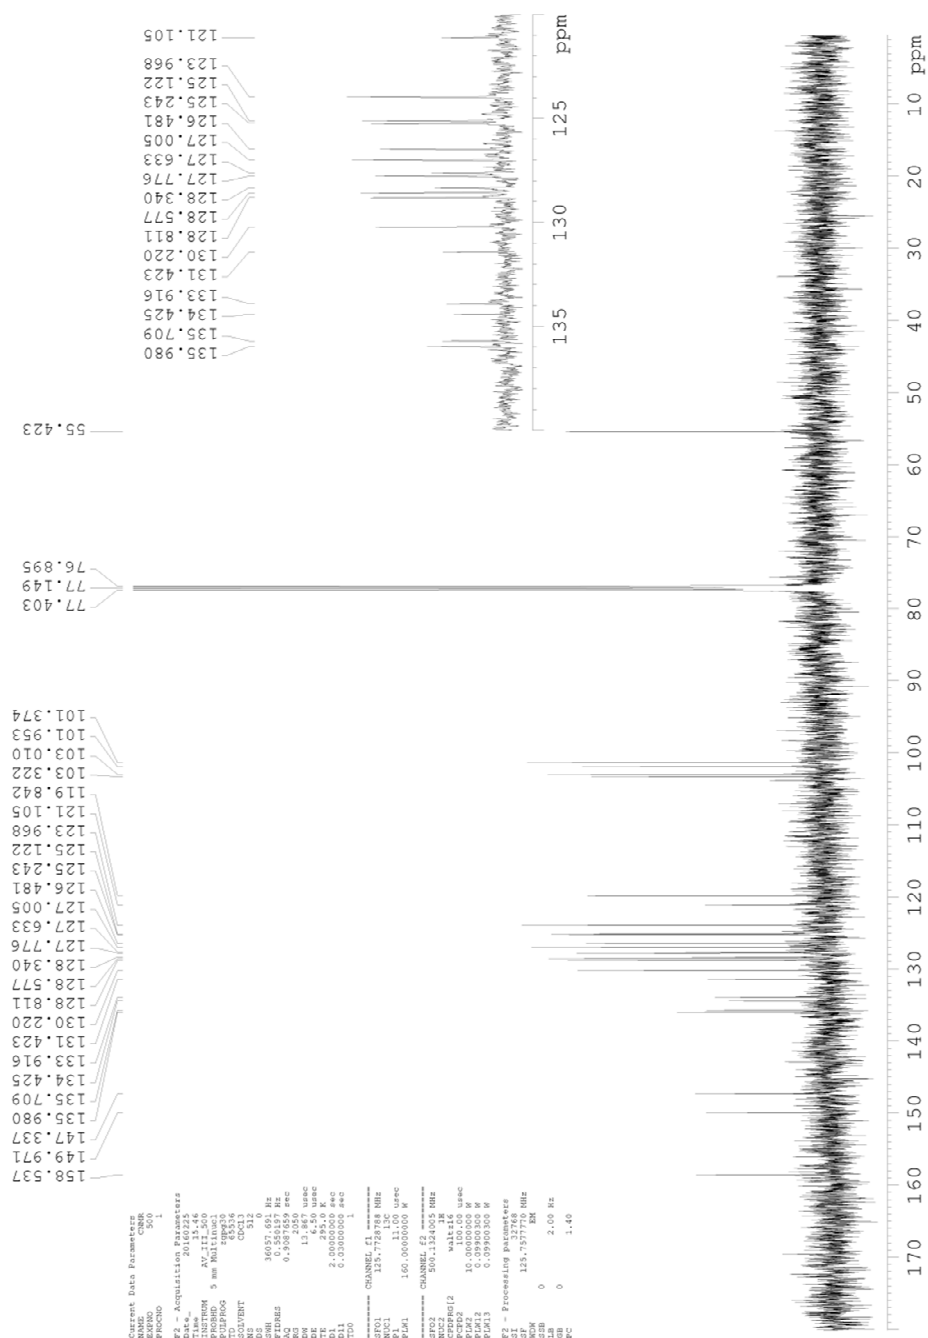

### <sup>1</sup>H NMR of 1d

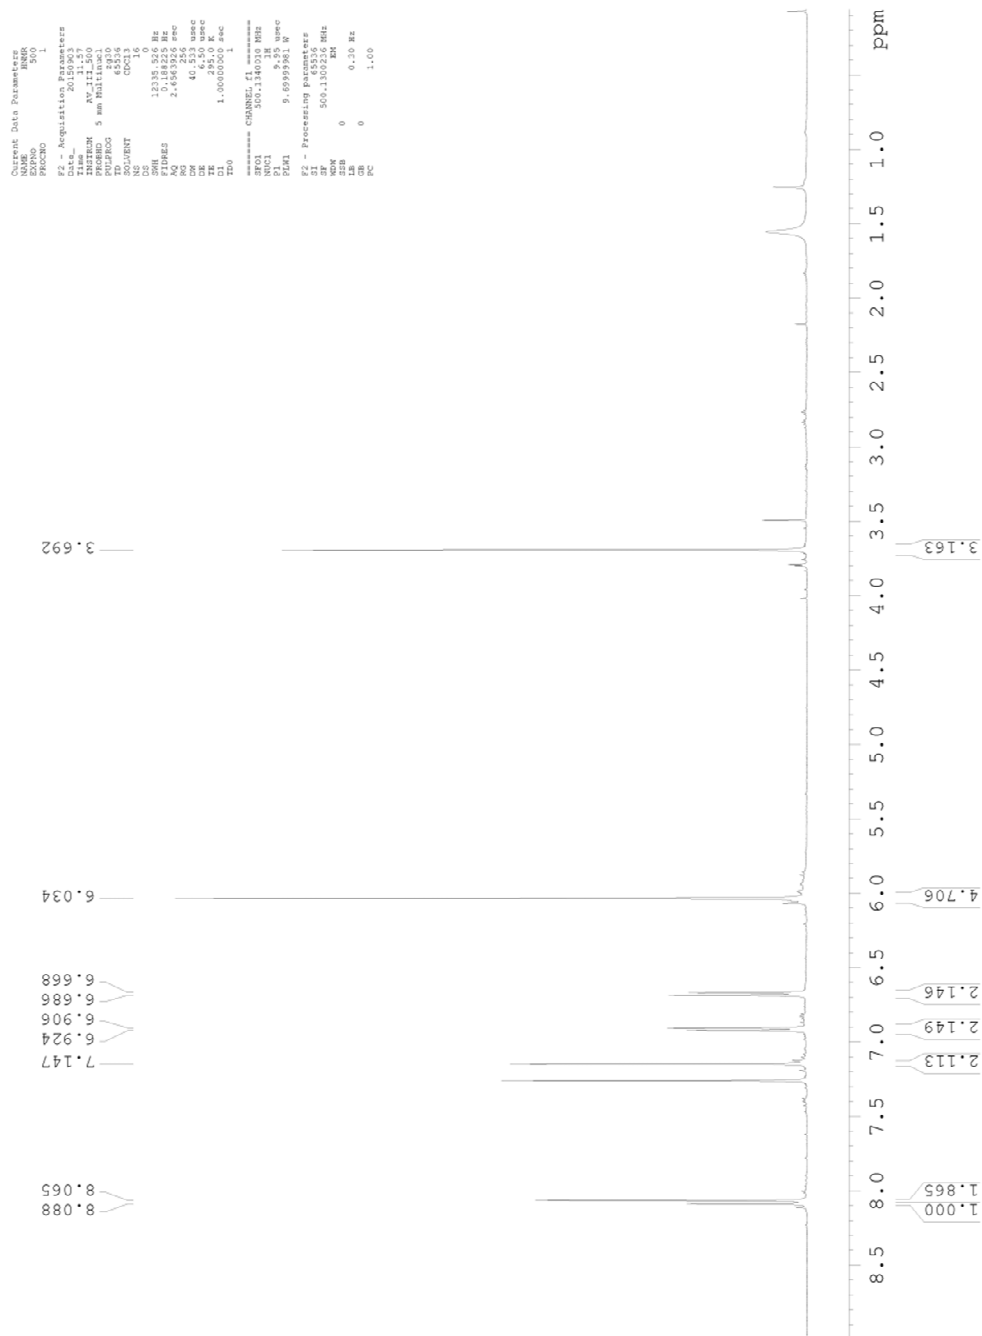

**$^{13}\text{C}$  NMR of 1d**



7,8,9-trimethoxy-5-(phenylsulfinyl)anthra[2,3-d][1,3]dioxole (2a)

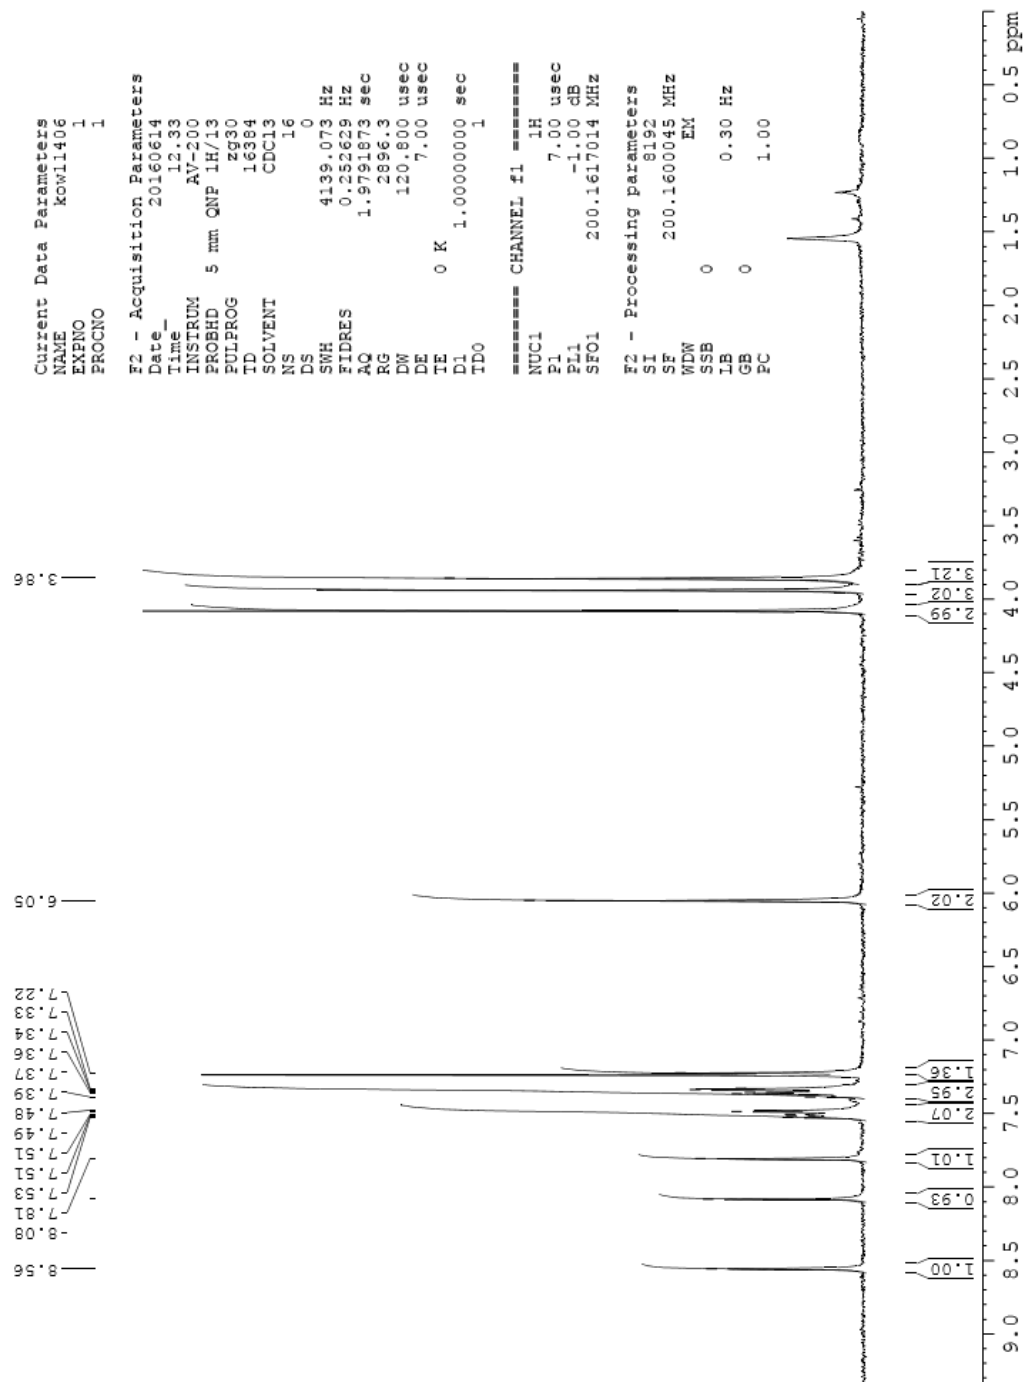

<sup>13</sup>C NMR of 2a

```
Current Data Parameters
NAME          kow10905
EXPNO         2
PROCNO        1
```

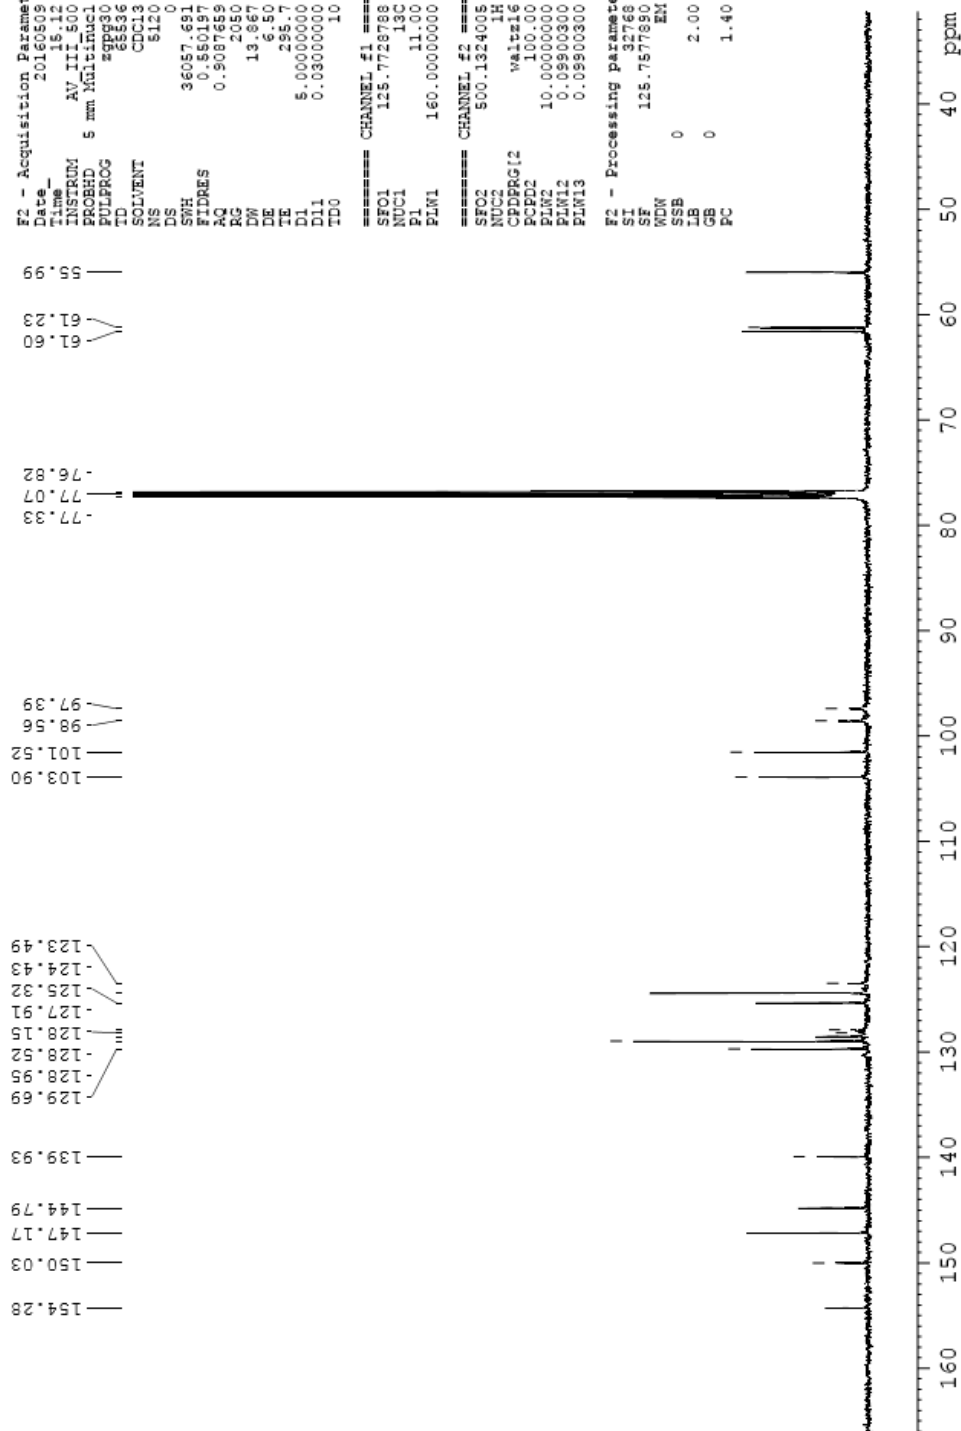

S15

7,8,9-Trimethoxy-5-(naphthalene-2-ylsulfinyl)anthra[2,3-d][1,3]dioxole (2b)

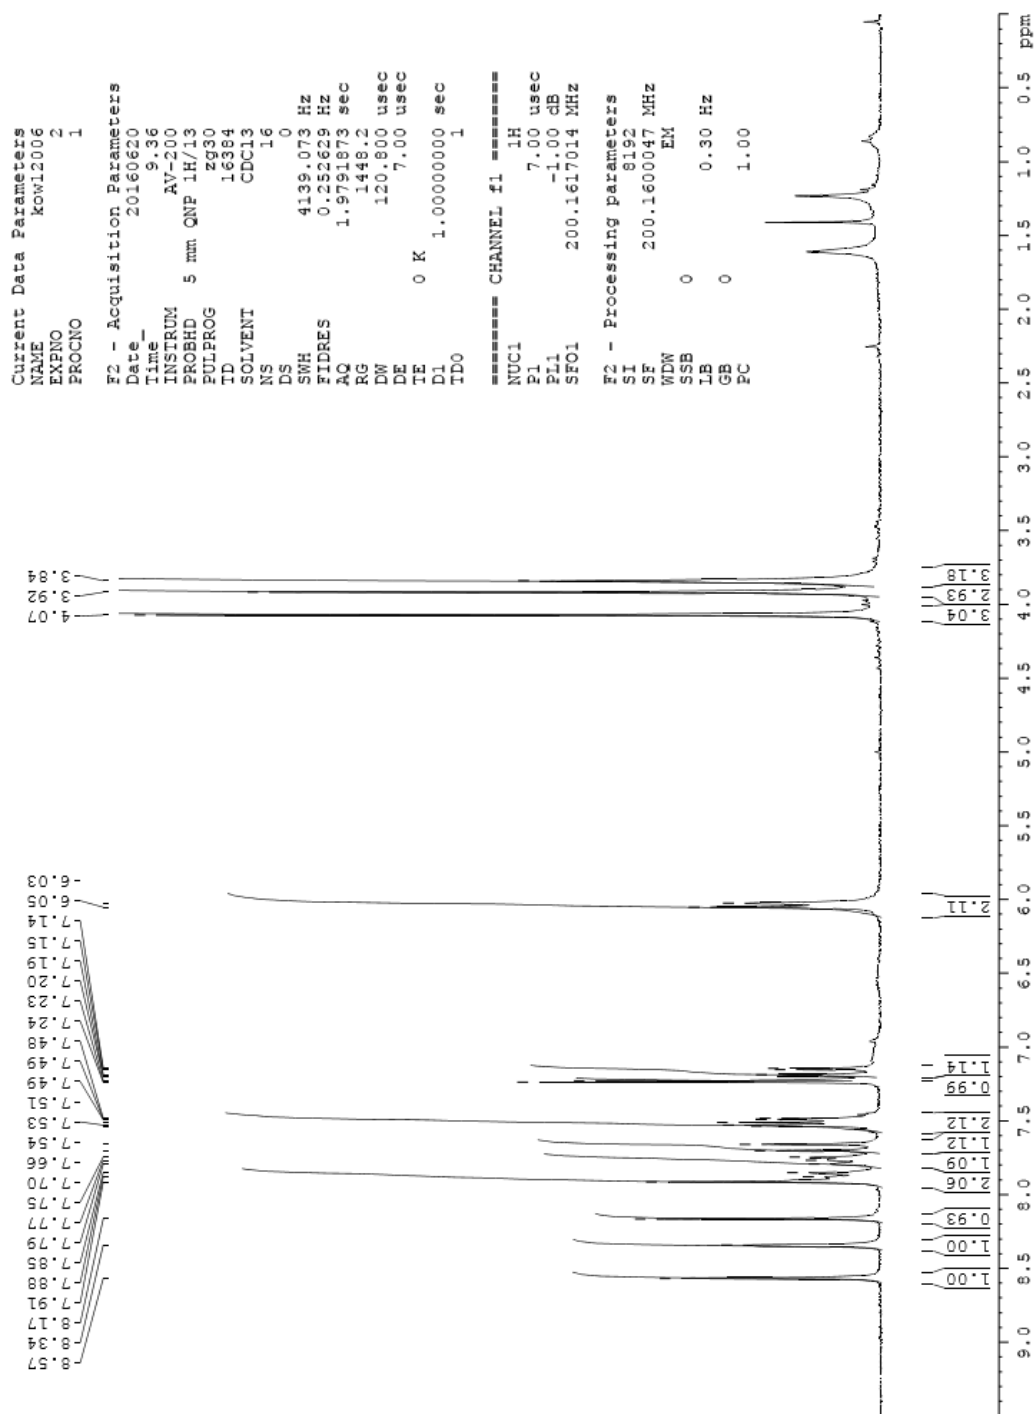

7,8,9-Trimethoxy-5-(naphthalene-2-ylsulfinyl)anthra[2,3-d][1,3]dioxole (2b)

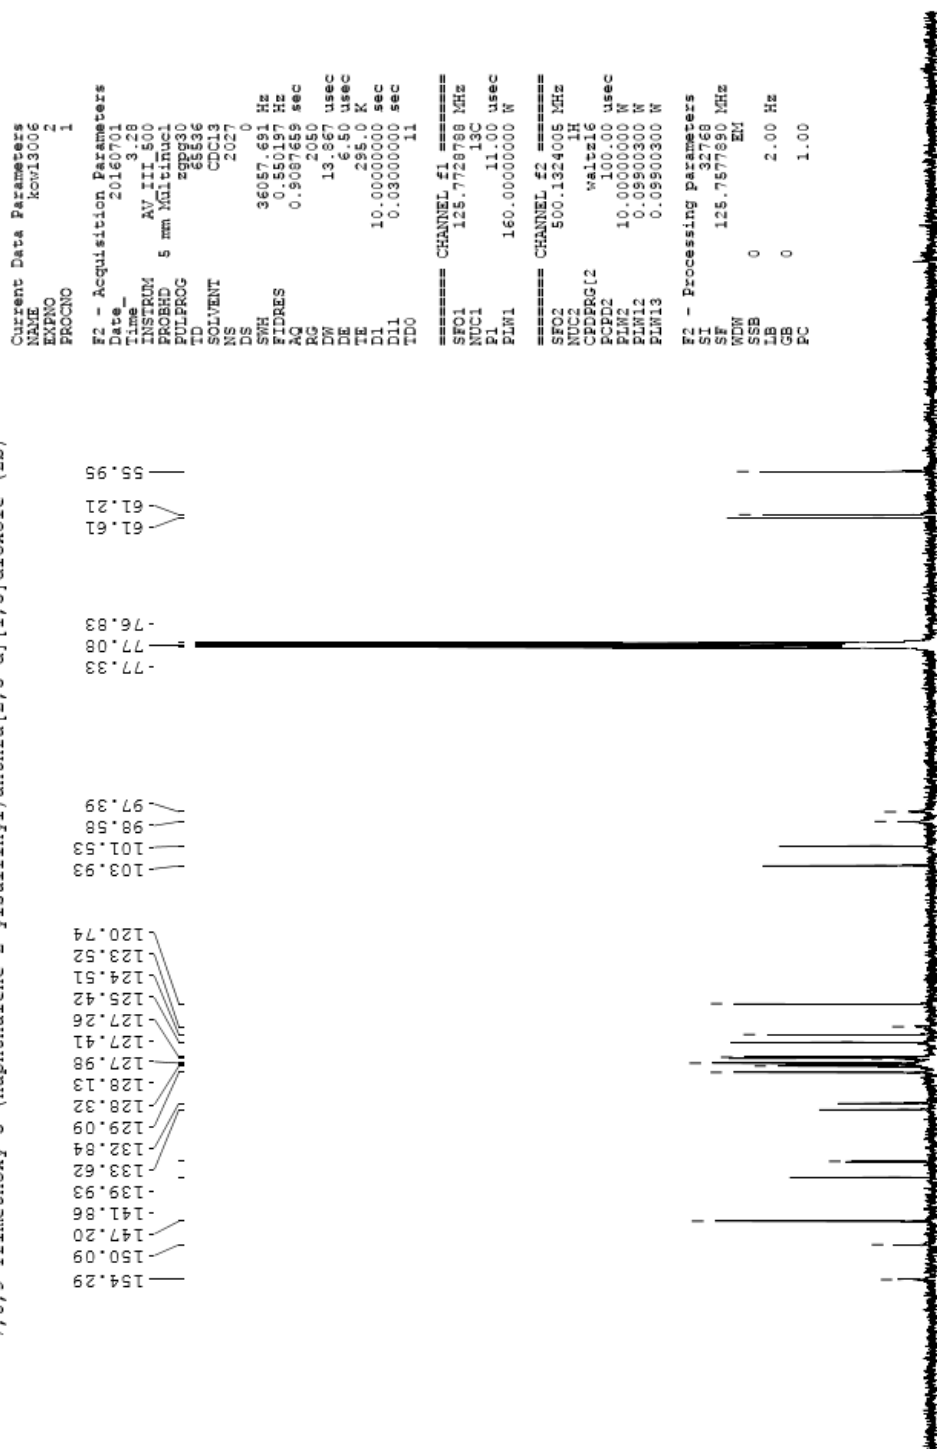

<sup>1</sup>H NMR of 2c

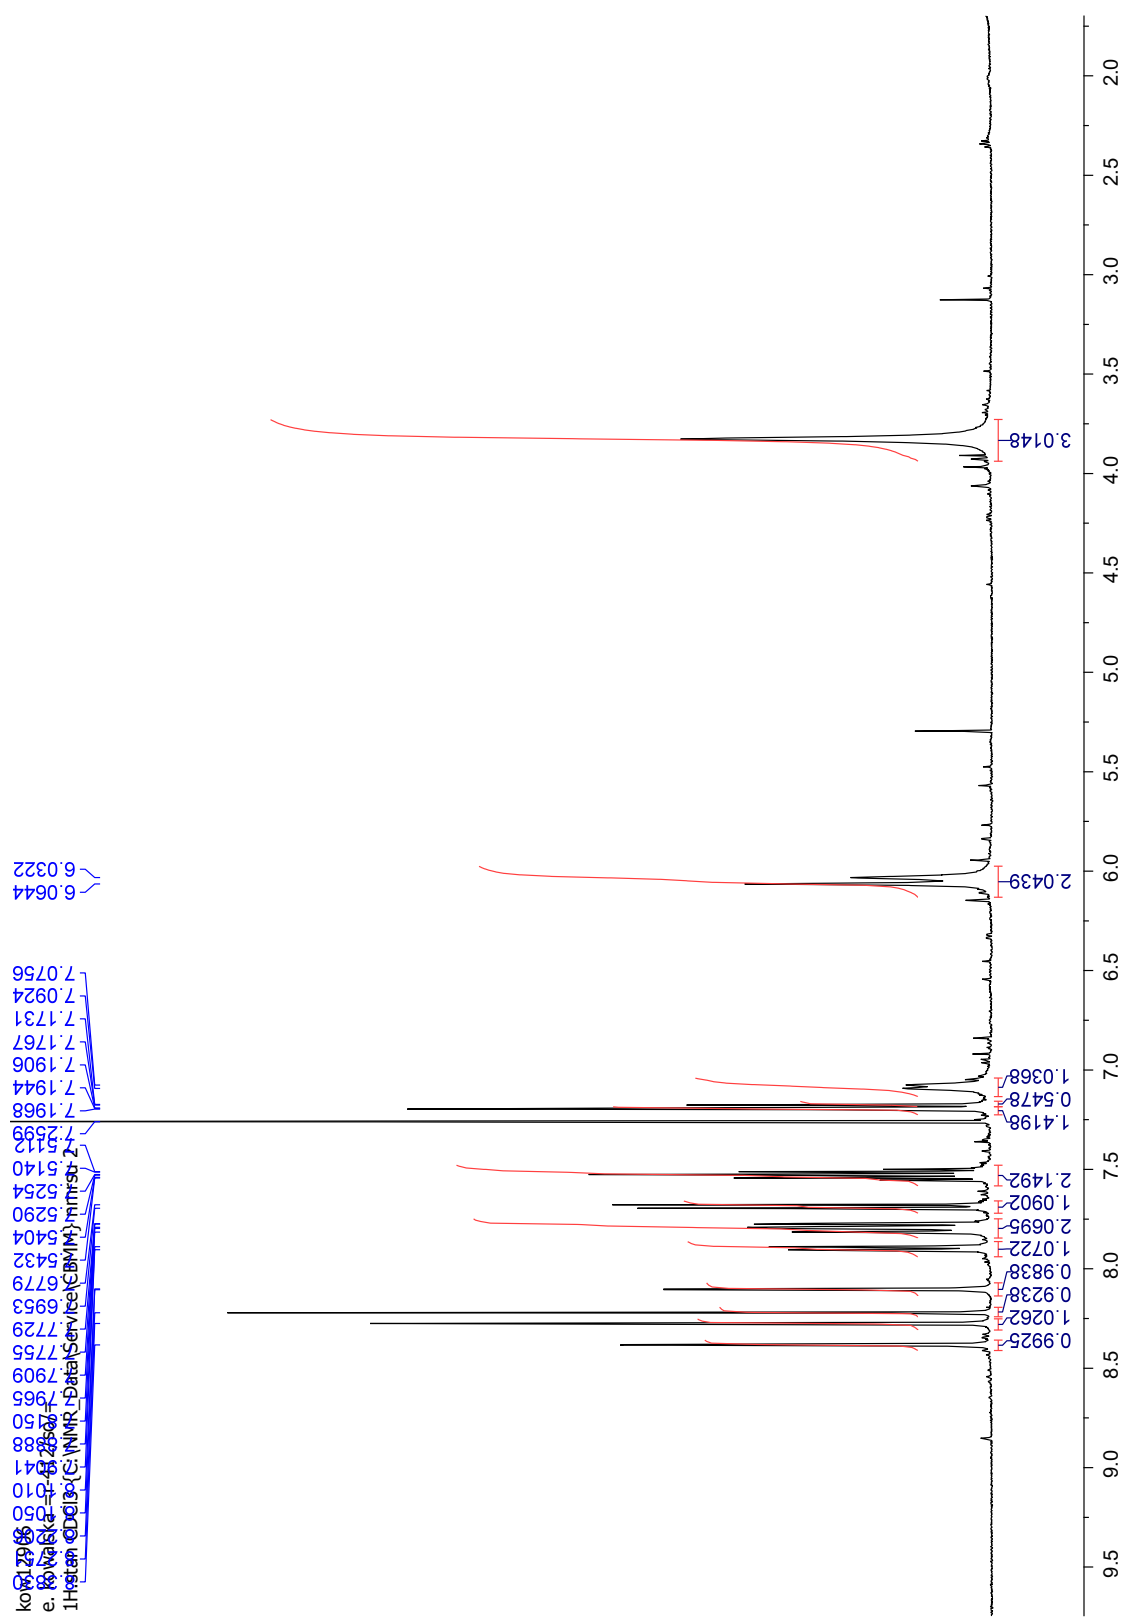

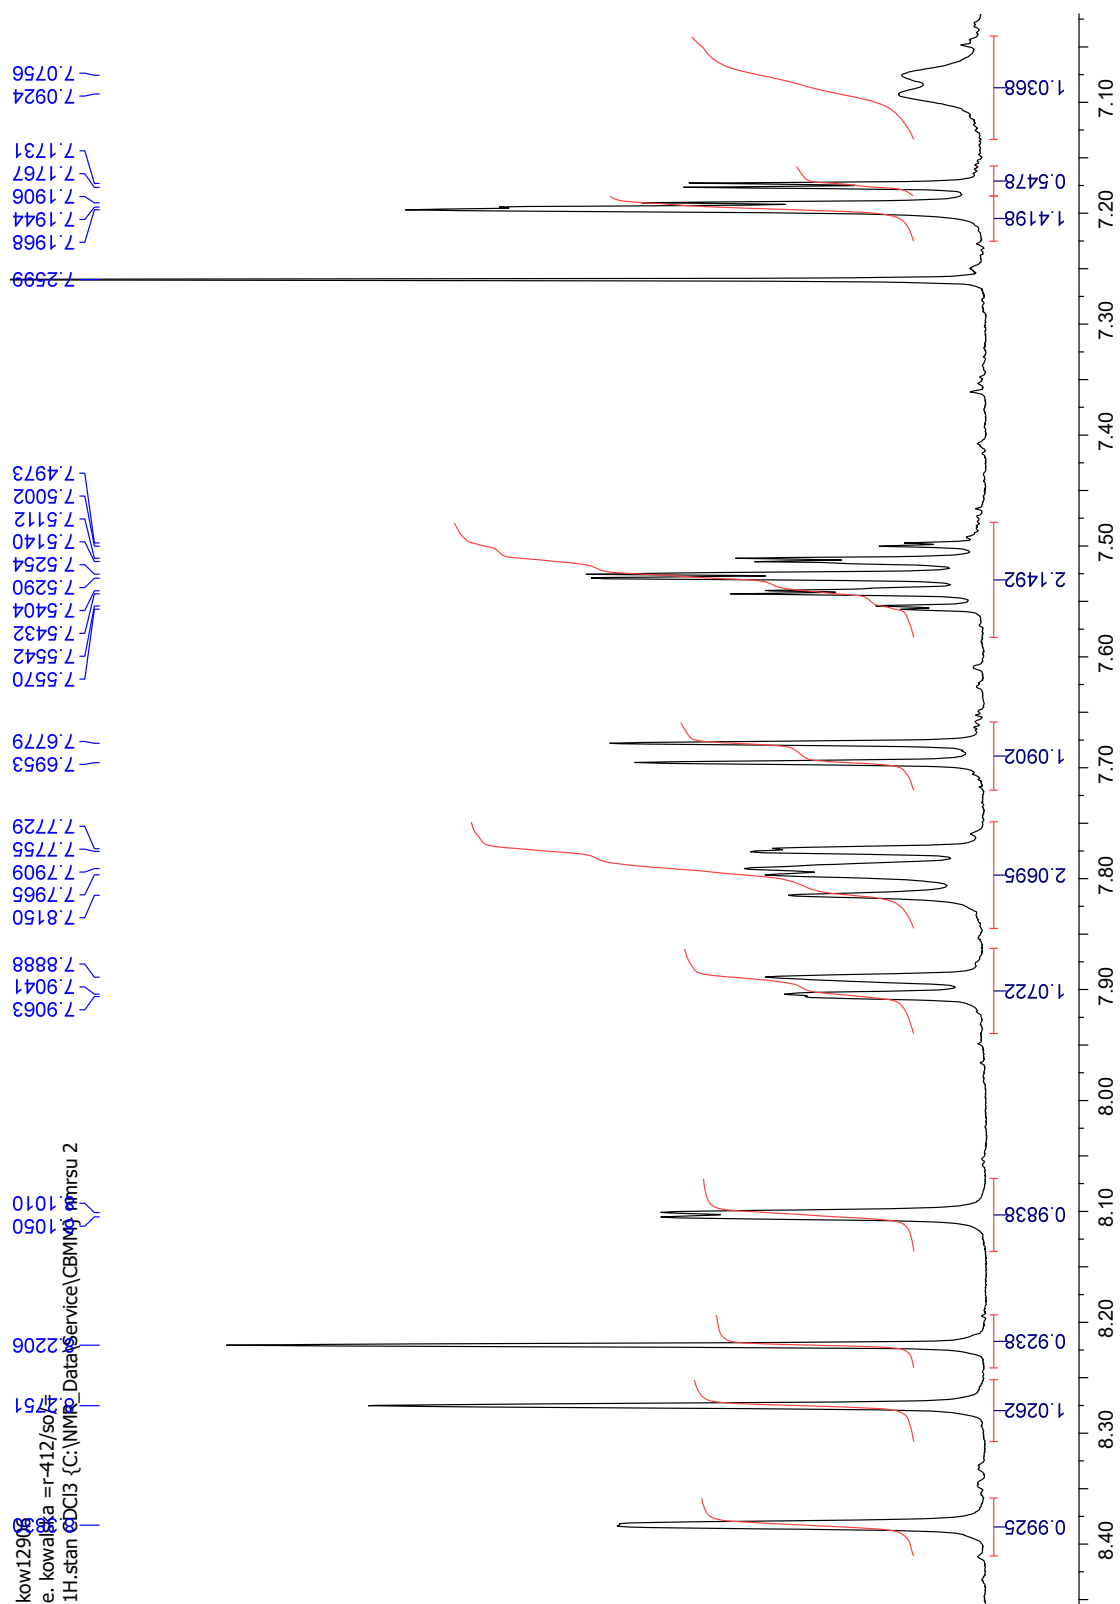

# <sup>13</sup>C NMR of 2c

8-Methoxy-5-(naphthalene-2-ylsulfinyl)anthra[2,3-d][1,3]dioxole (2c)

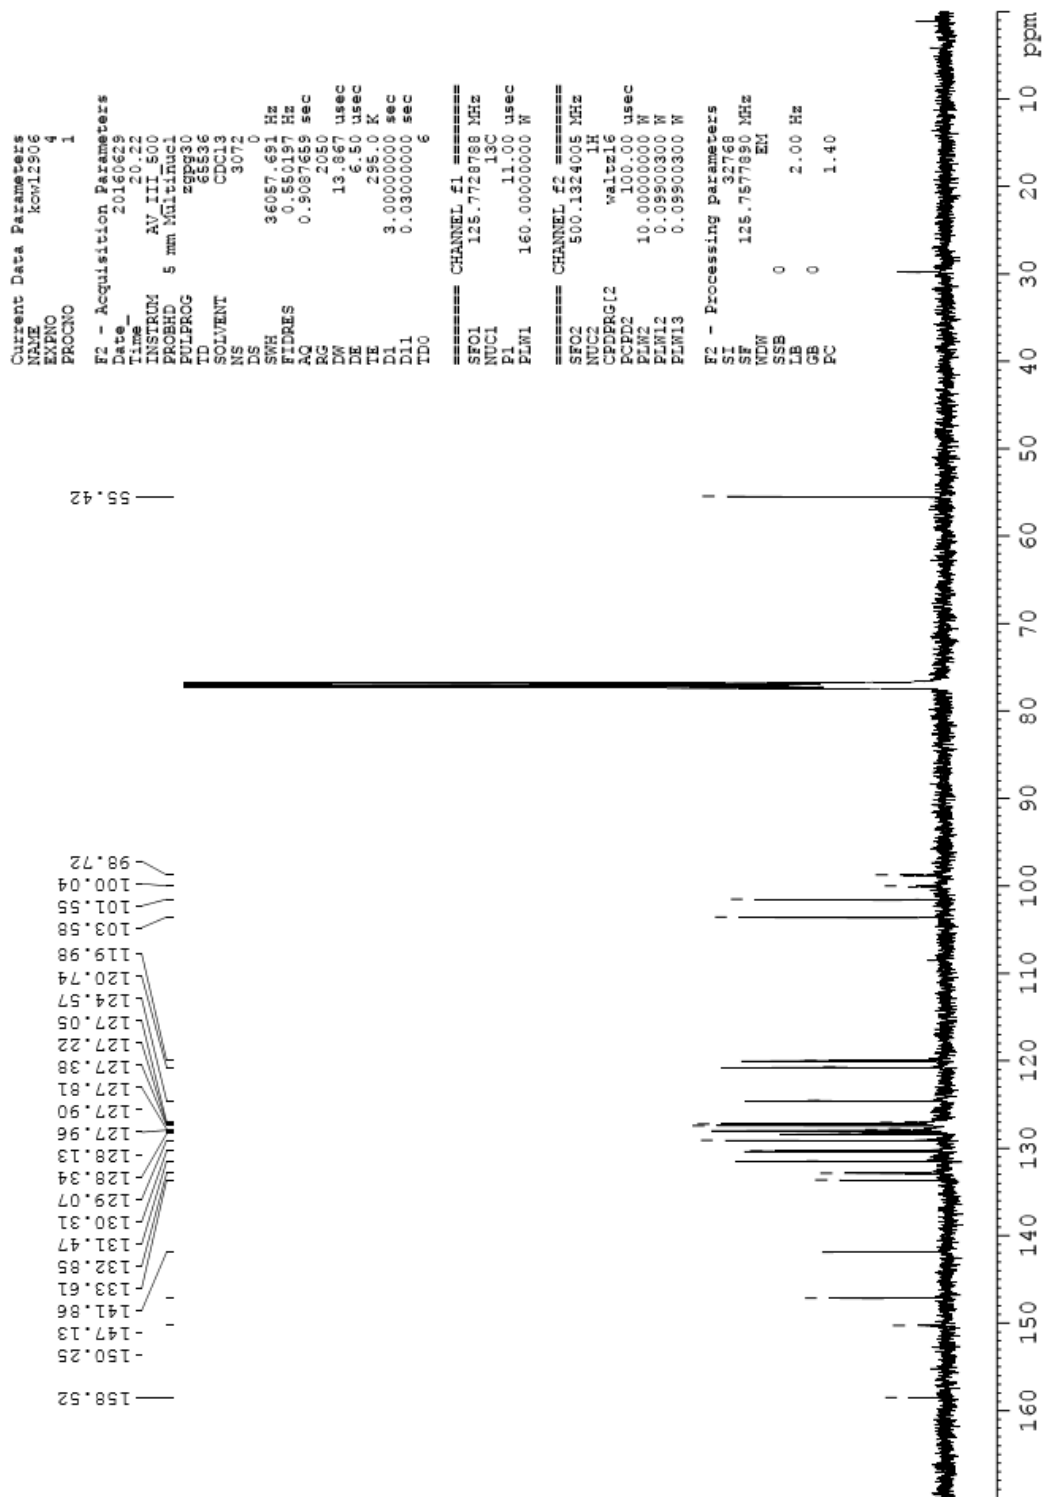

# <sup>1</sup>H NMR of 2d

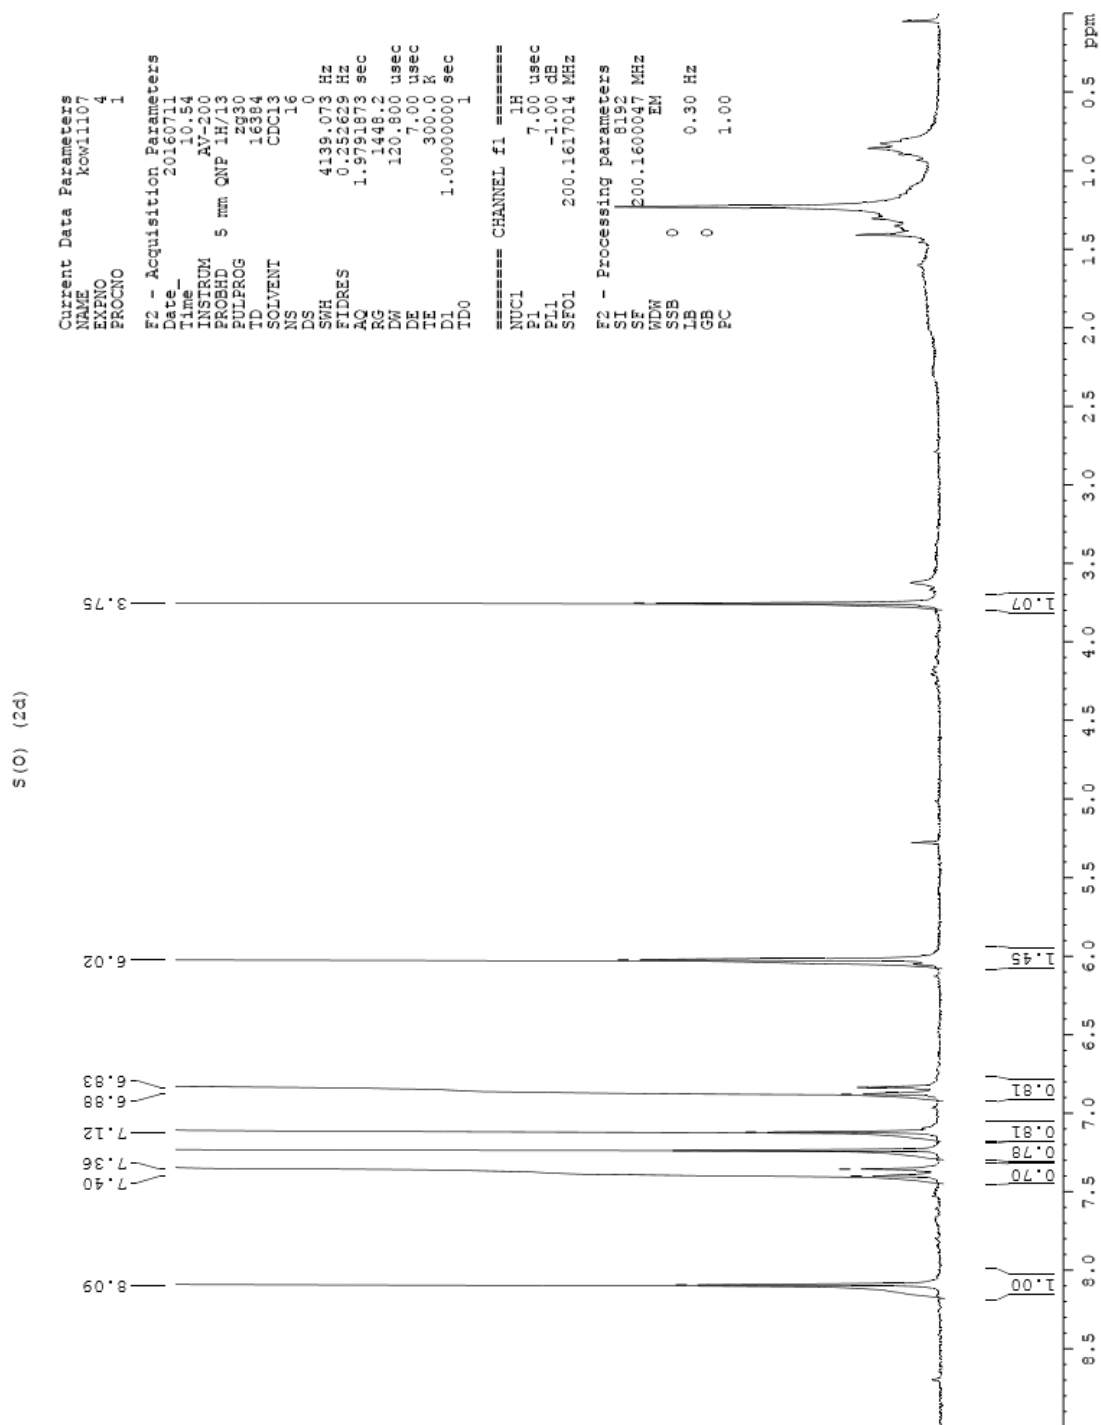

## S22

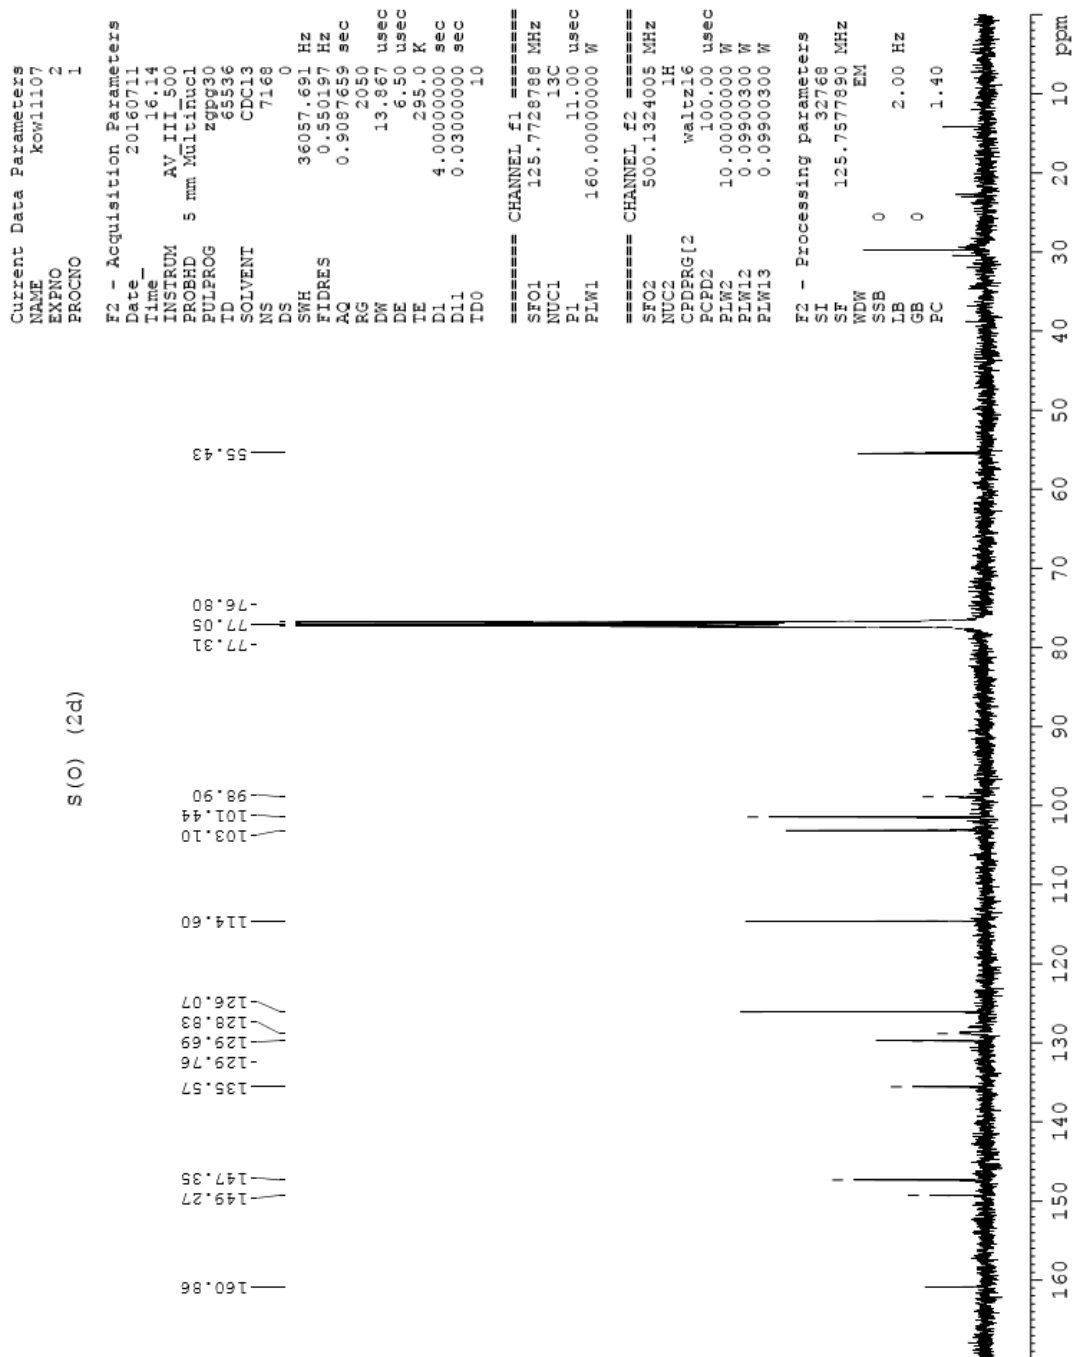

**$^1\text{H}$  NMR of 3c**

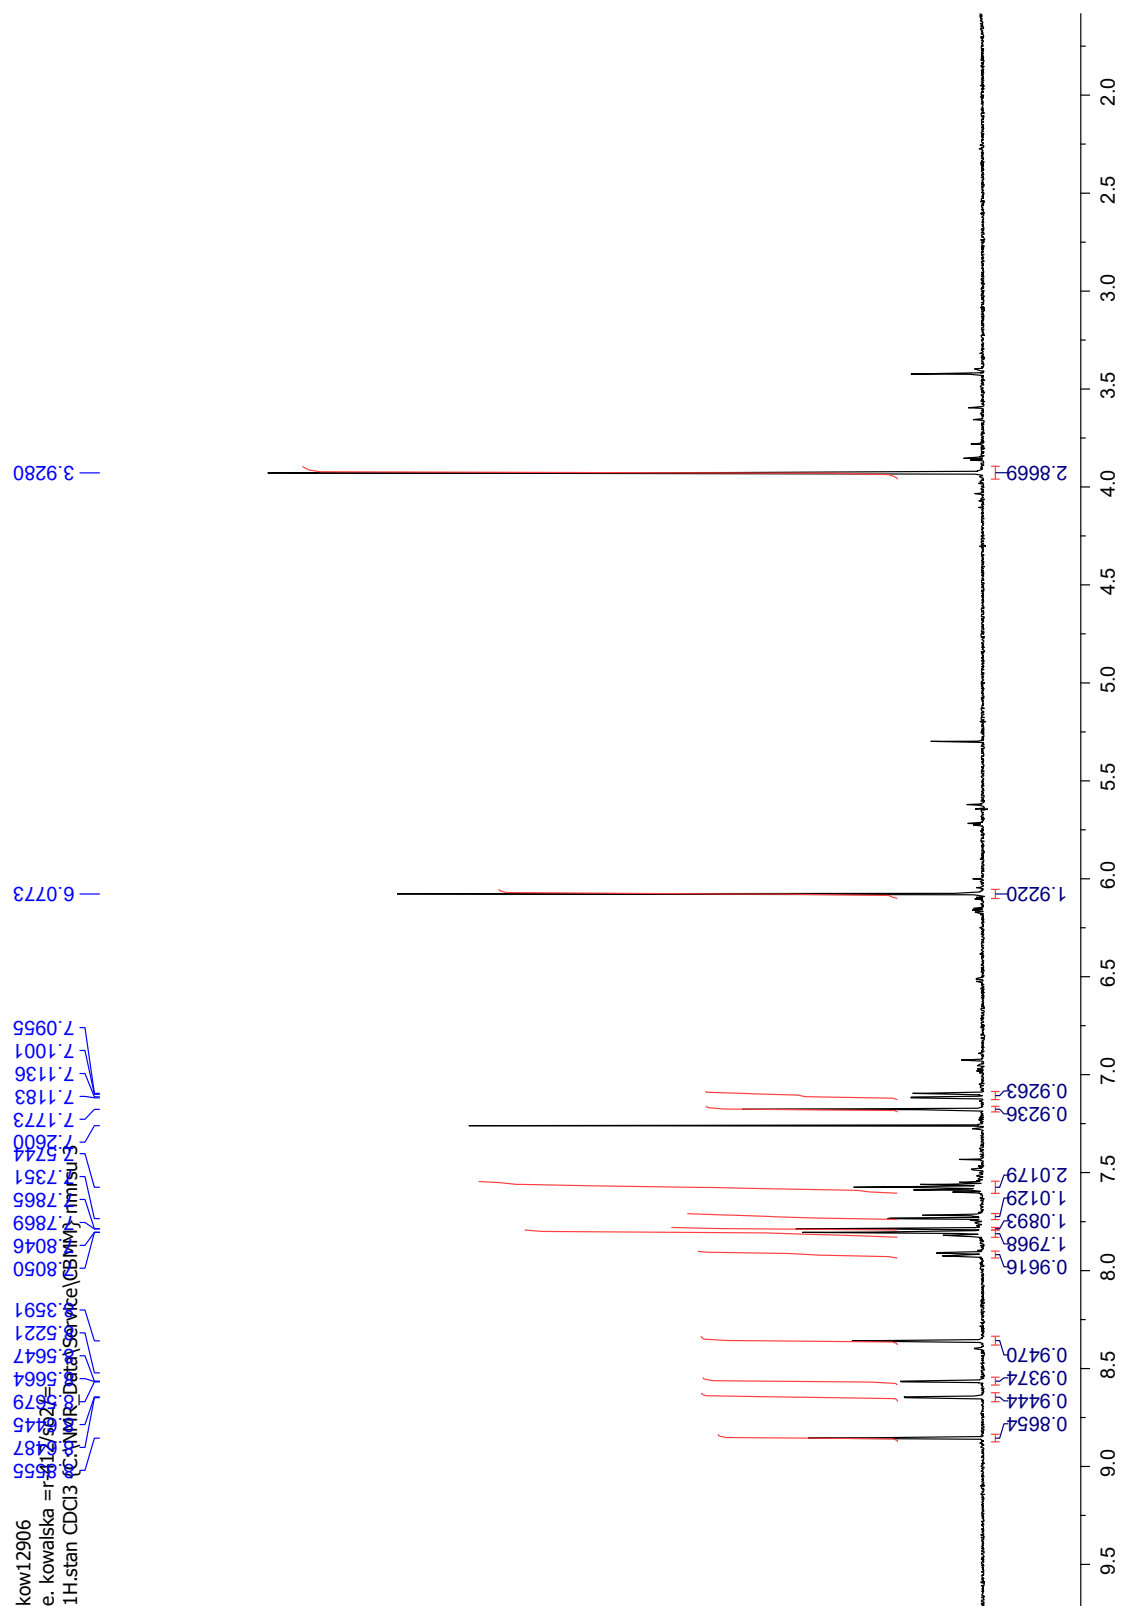

kow12906  
 e. kowalska = 11.2.2018  
 1H.stan CDCl<sub>3</sub> (CDCl<sub>3</sub>) - 1H NMR



<sup>13</sup>C NMR of 3c

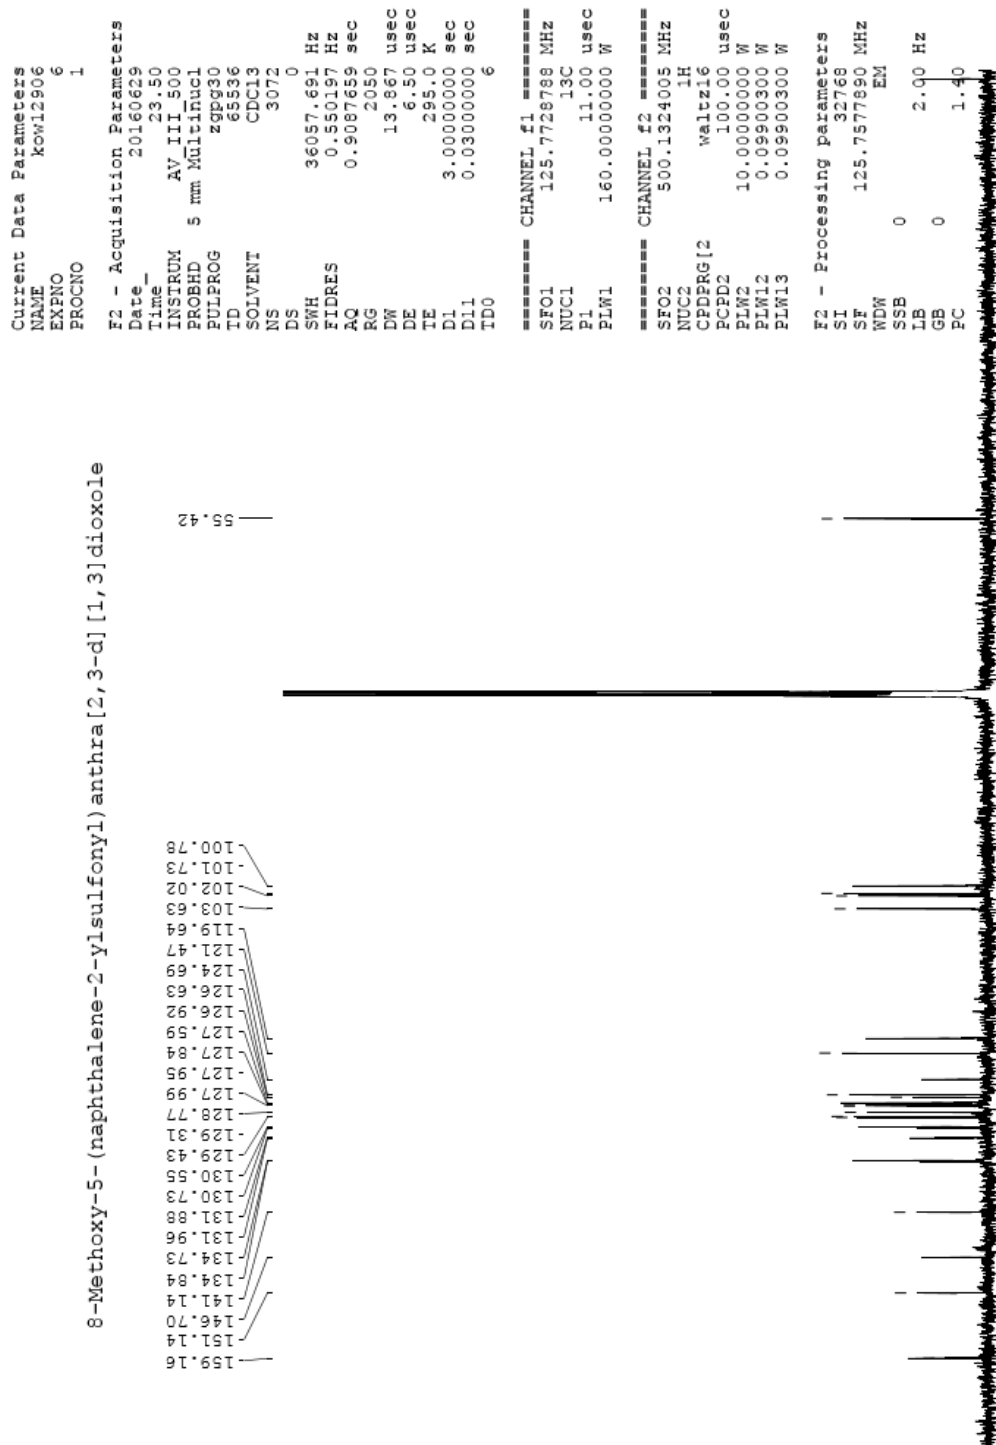

# <sup>1</sup>H NMR of 3d

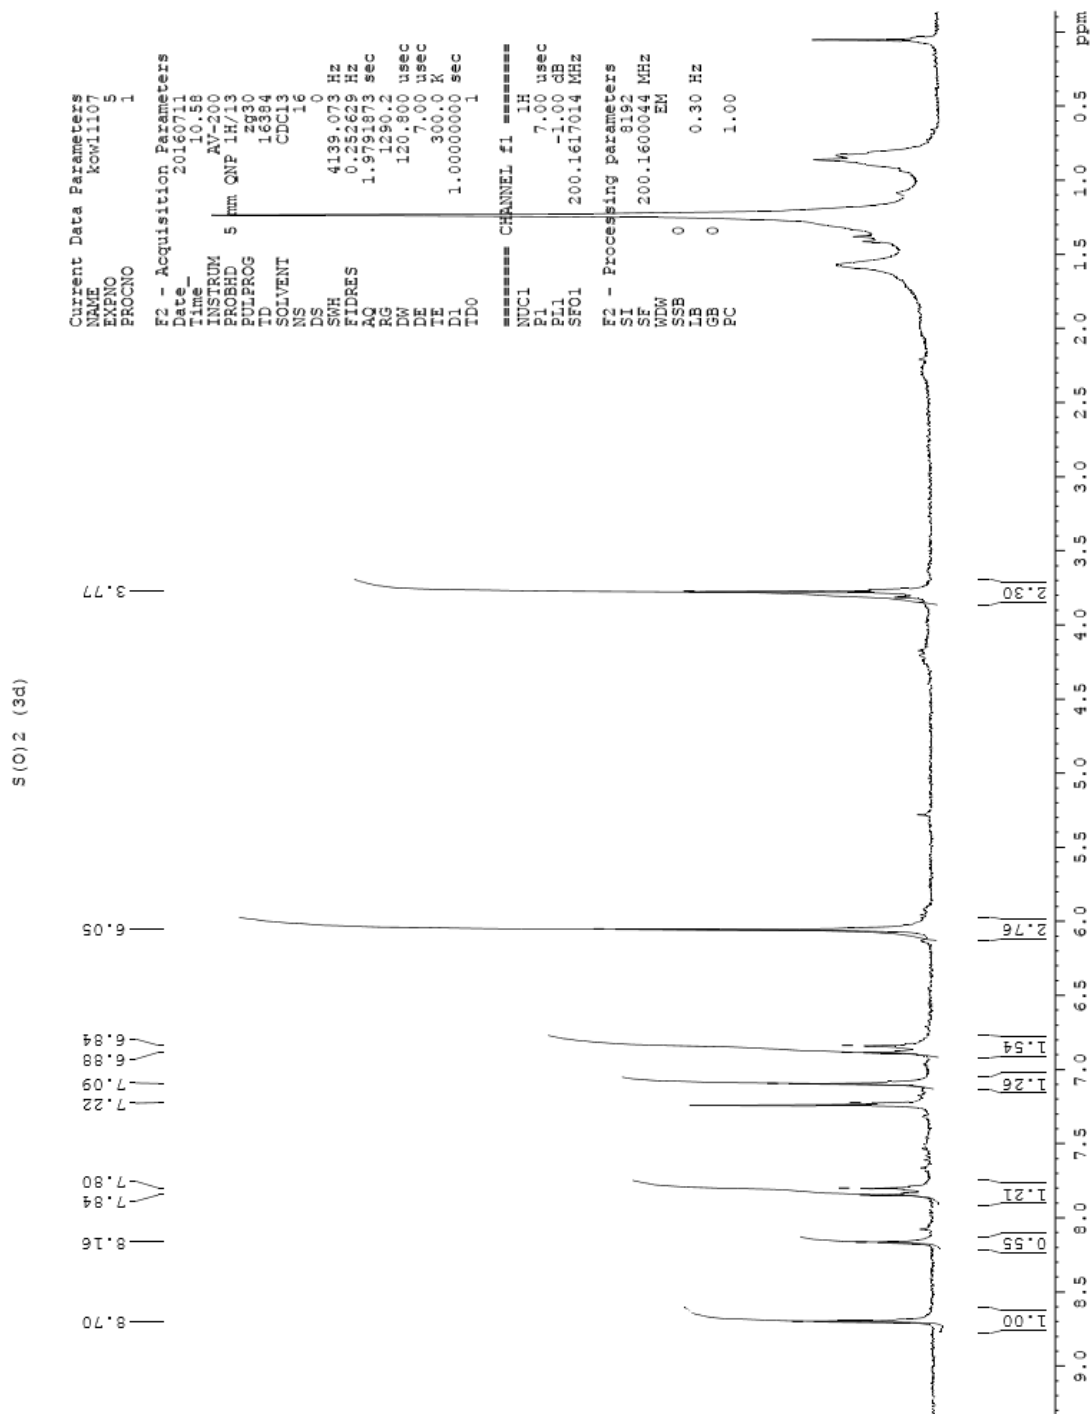

# <sup>13</sup>C NMR of 3d

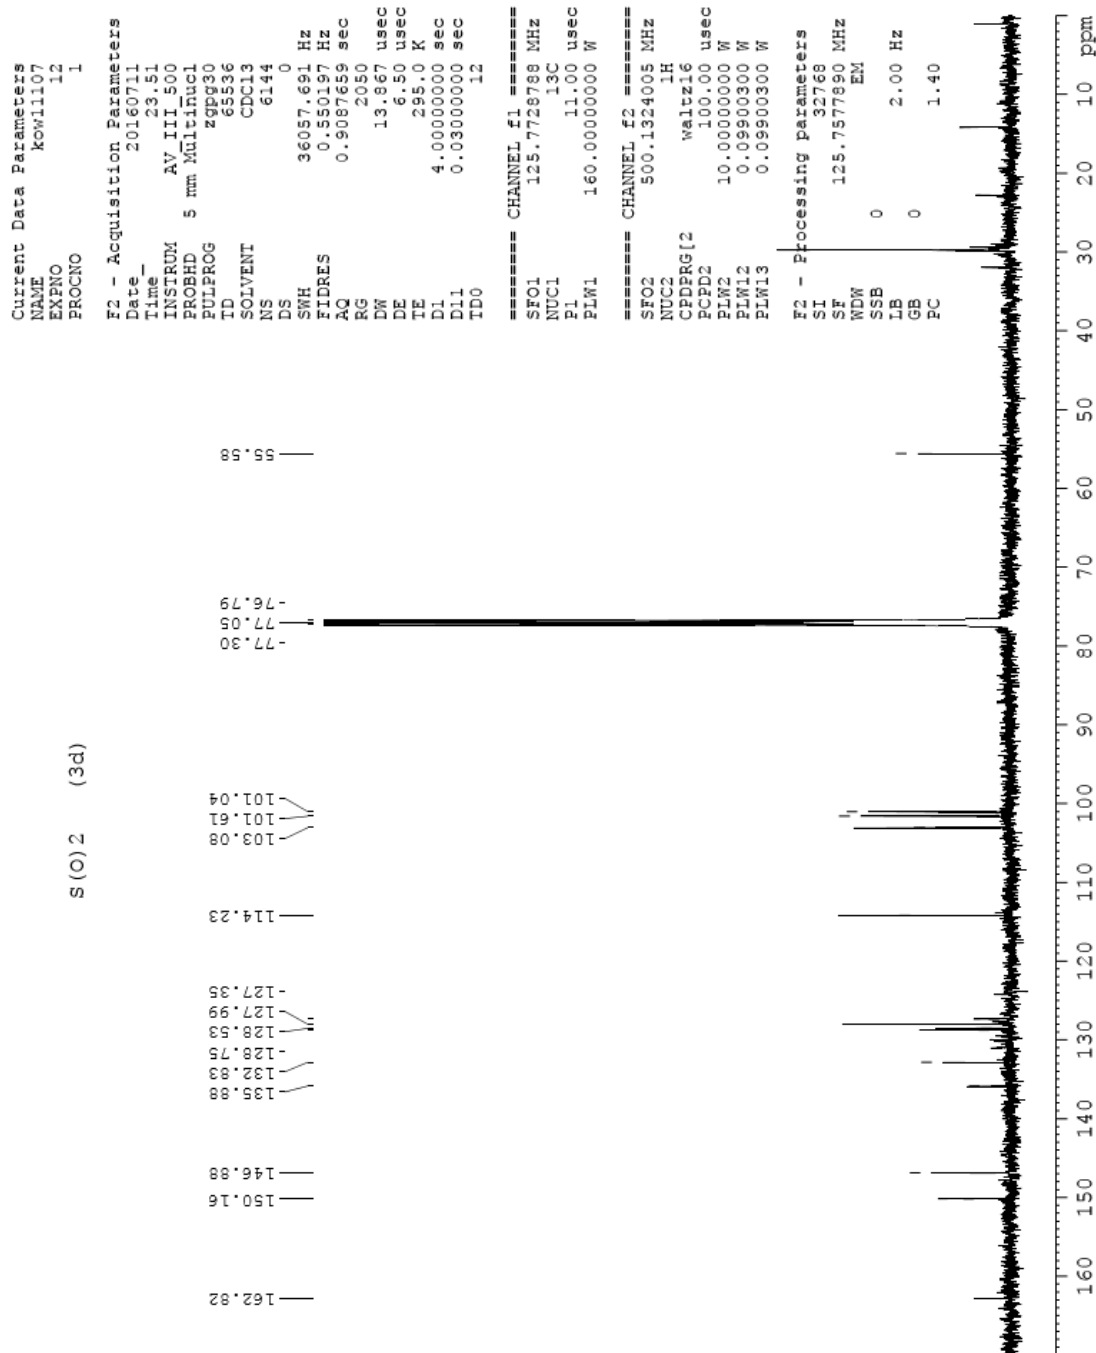

## Optical properties

**Figure S2.** Chemical structures of sulfides **1a-d**, sulfoxides **2a-d** and sulfones **3c,d** used in measurements.

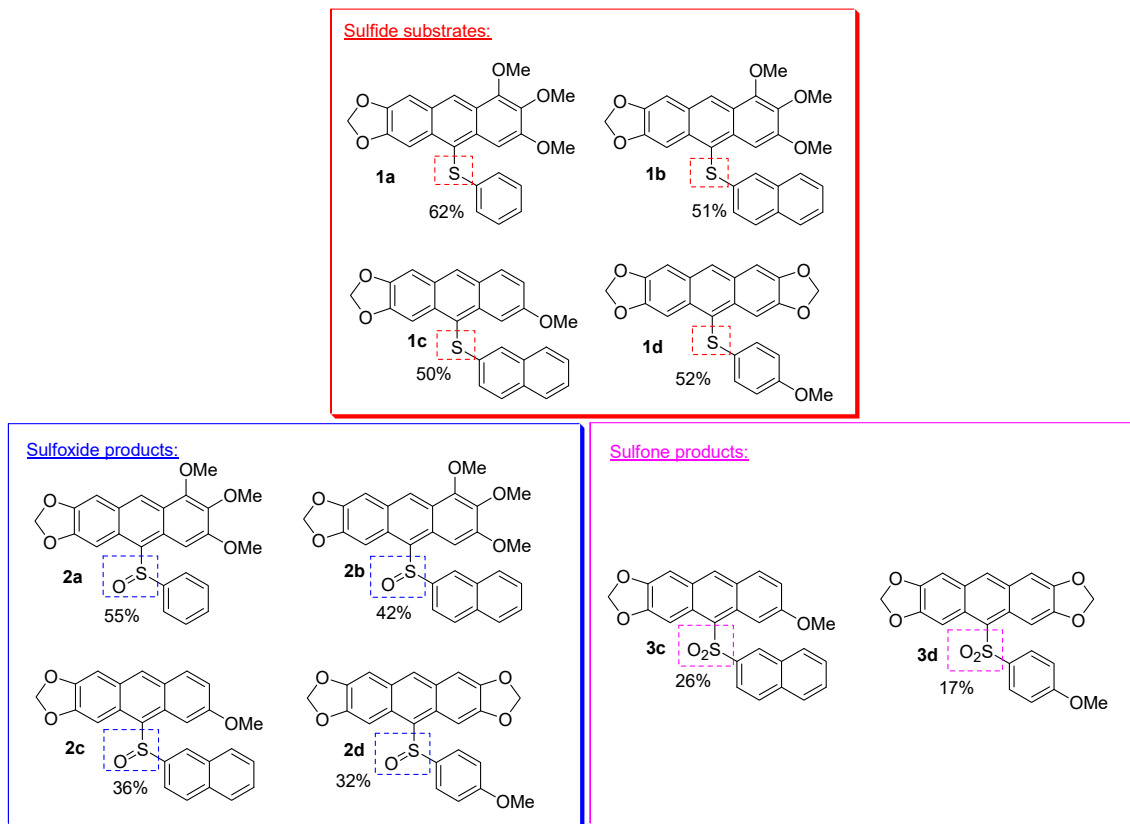

**Figure S3.** Absorption spectra for sulfides **1a-d**, sulfoxides **2a-d** and sulfones **3c,d** in ethanol solutions.

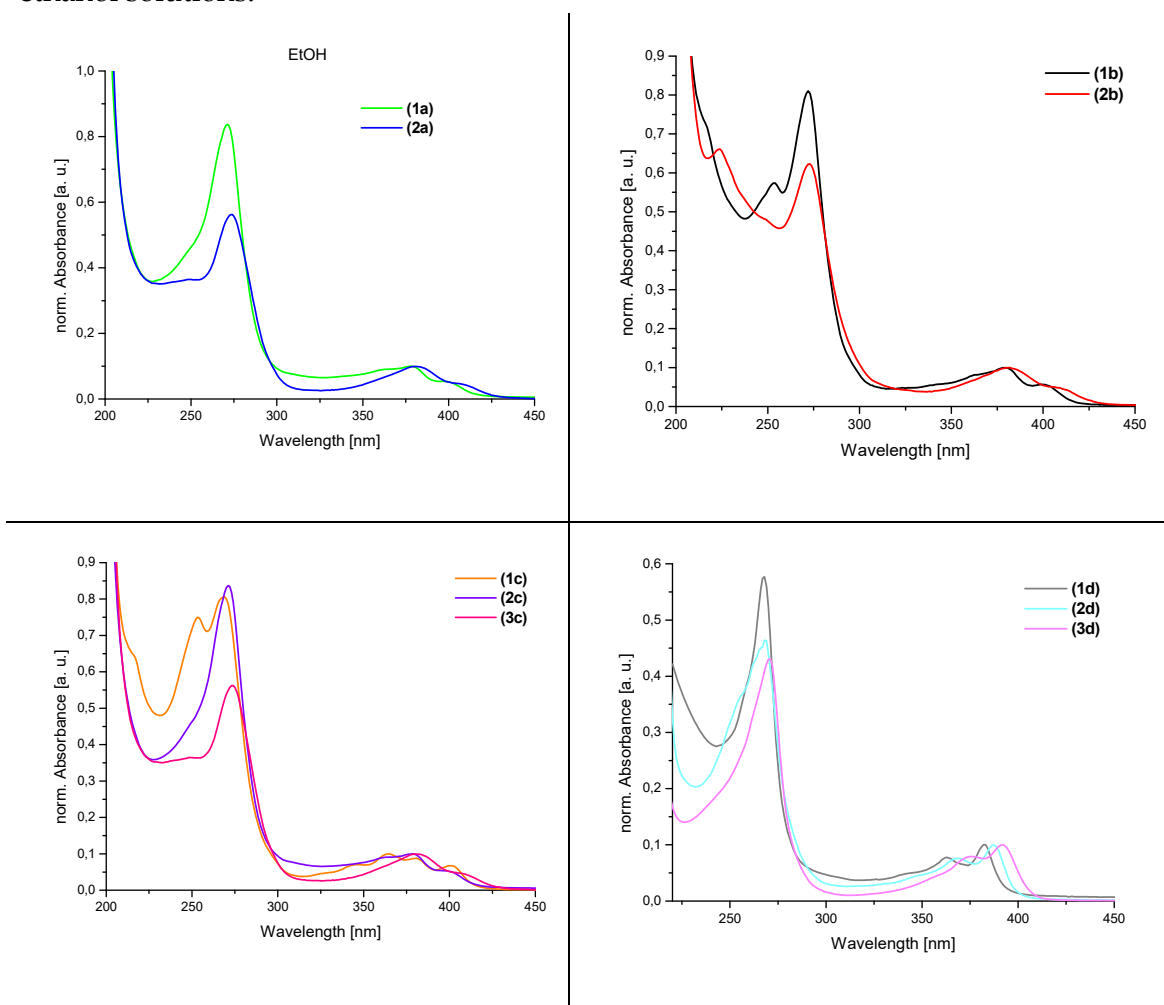

## Time-correlated single-photon counting (TCSPC) measurements

**Figure S4.** Time-correlated single-photon counting (TCSPC) measurements of photoluminescence lifetimes in ethanol solutions.

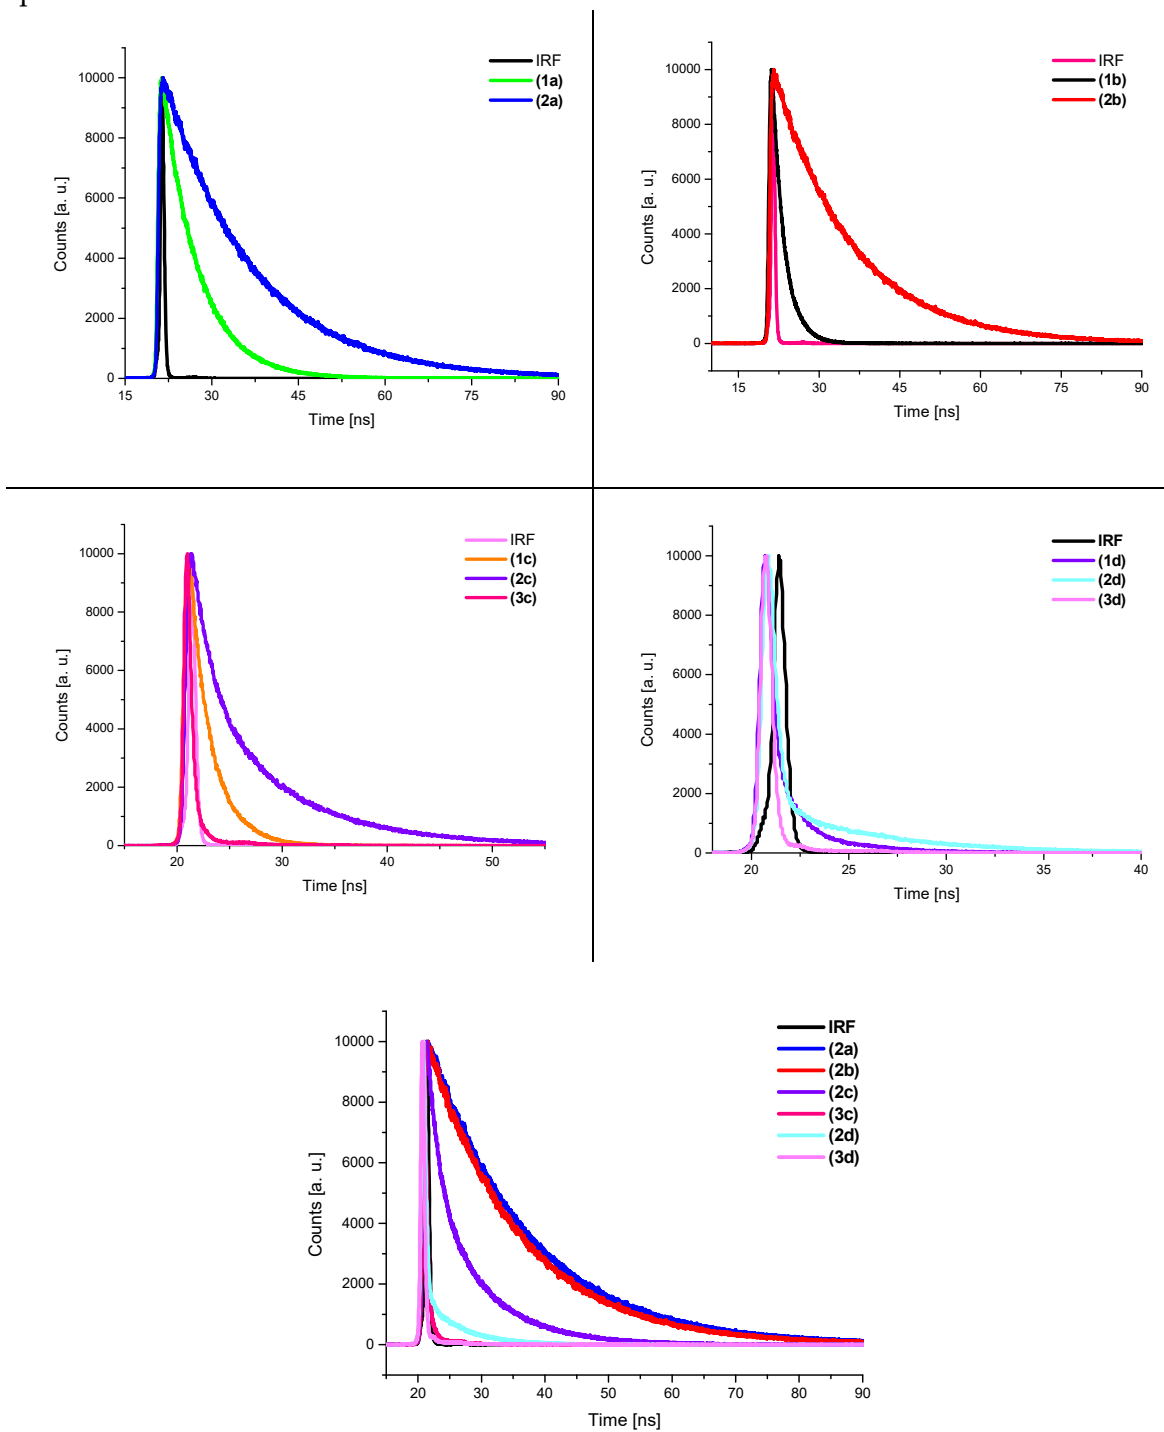

**Figure S5.** UV/Vis absorption and photoluminescence spectra for sulfides **1a-d**, sulfoxides **2a-d** and sulfones **3c,d** in toluene solutions.

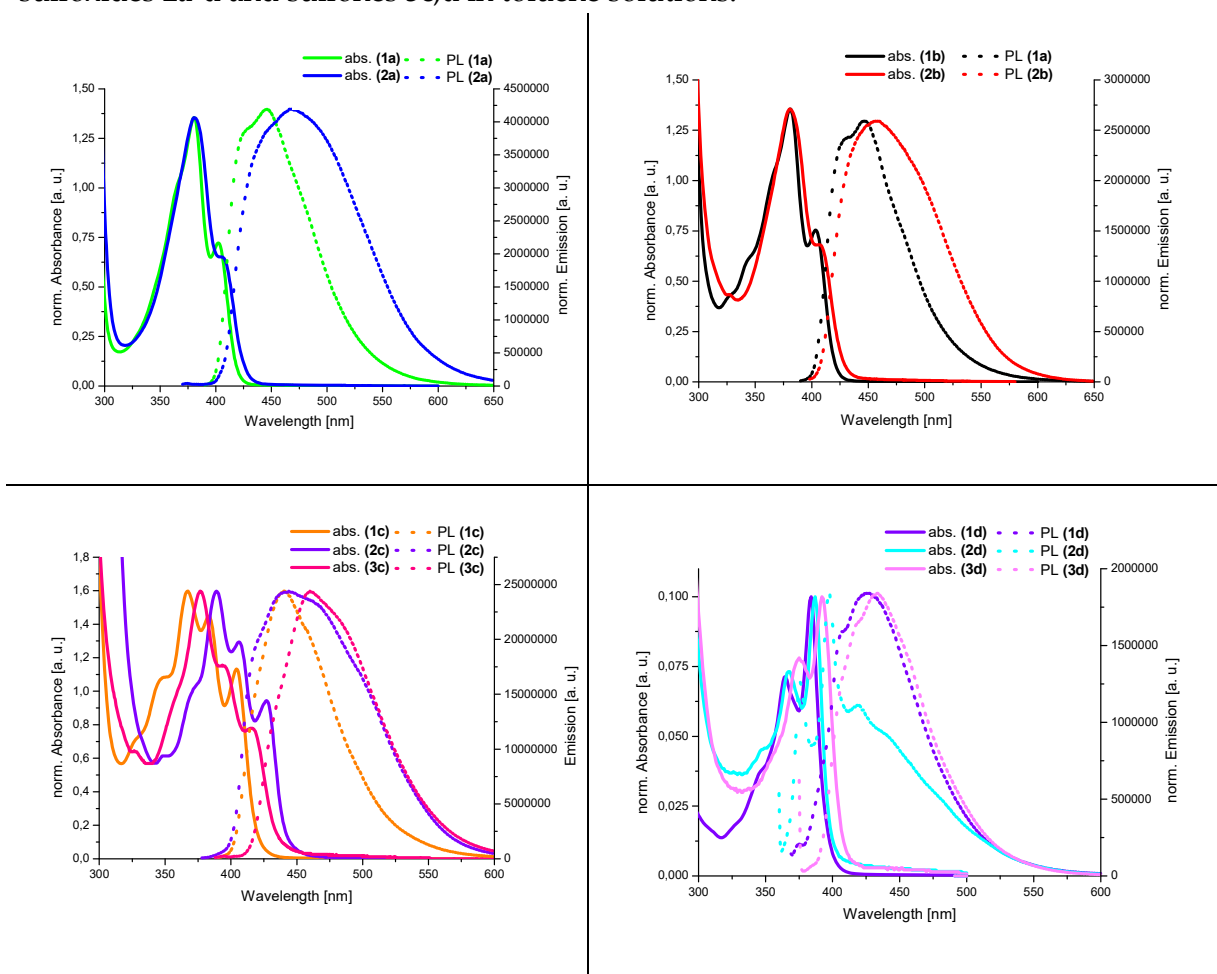

## Time-correlated single-photon counting (TCSPC) measurements

**Figure S6.** Time-correlated single-photon counting (TCSPC) measurements of photoluminescence lifetimes in toluene solutions.

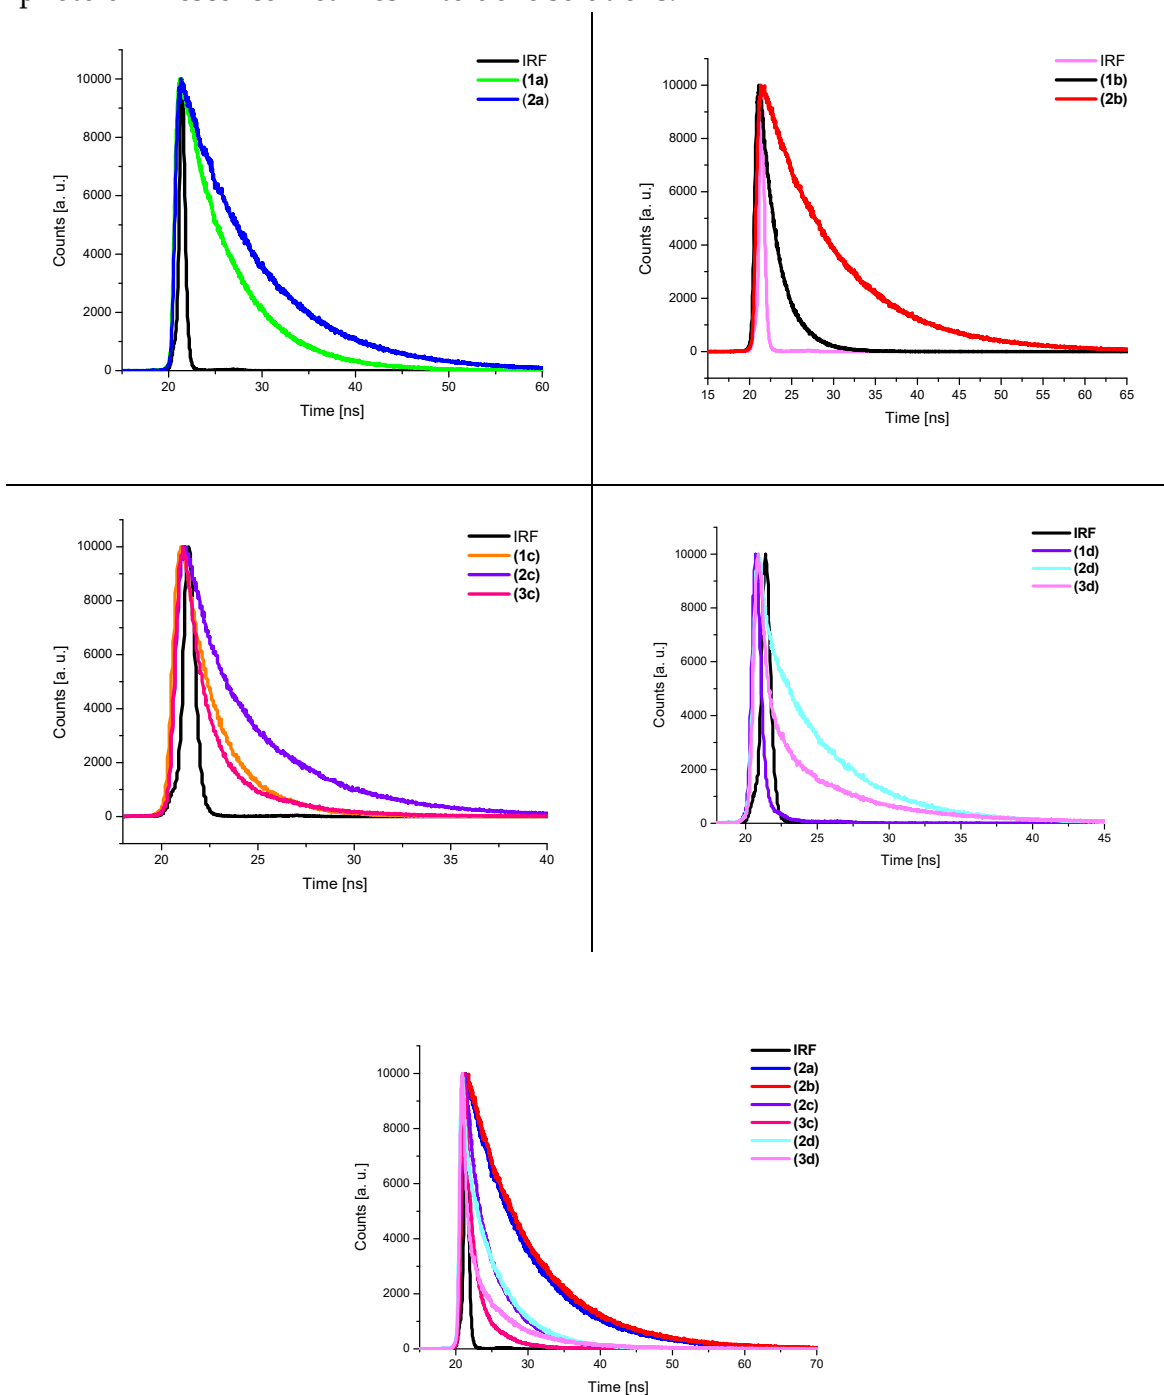

**Figure S7.** Absorption spectra recorded for sulfides **1a-d**, sulfoxides **2a-d** and sulfones **3c,d** in solid state (thin-films).

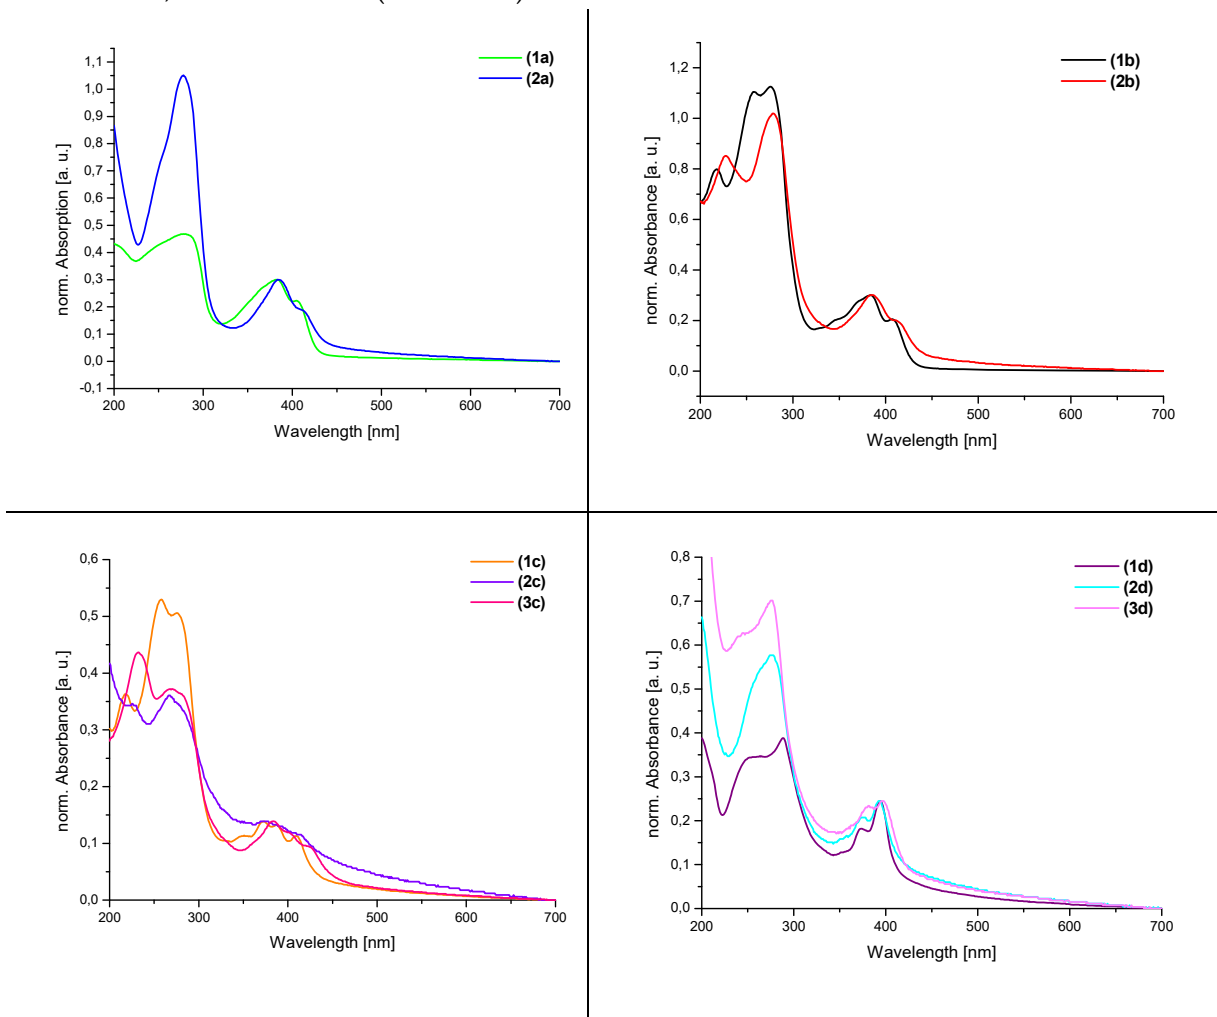

## Photostability and photooxidation stability in ethanol solutions.

The photodegradation was investigated by monitoring the absorbance decay of  $10^{-5}$  M ethanolic solutions in quartz cuvettes stored in the dark at room temperature, under ambient atmosphere and Ar atmosphere, and exposed to UVP-Hg-Pen-ray lamp (254 nm, 16.33 mW/cm<sup>2</sup> at distance 1 cm) and fluorescent lamp VL-6.LC (6W) (365 nm, 27.4 mW/cm<sup>2</sup> at distance 1 cm).

**Figure S8.** Photostability and photooxidation stability of compounds: **1a-d**, **2a-d** and **3c,d** in ethanol solutions.

**1a** in ethanol UV-Vis 254 nm, O<sub>2</sub>, c = 10<sup>-5</sup>

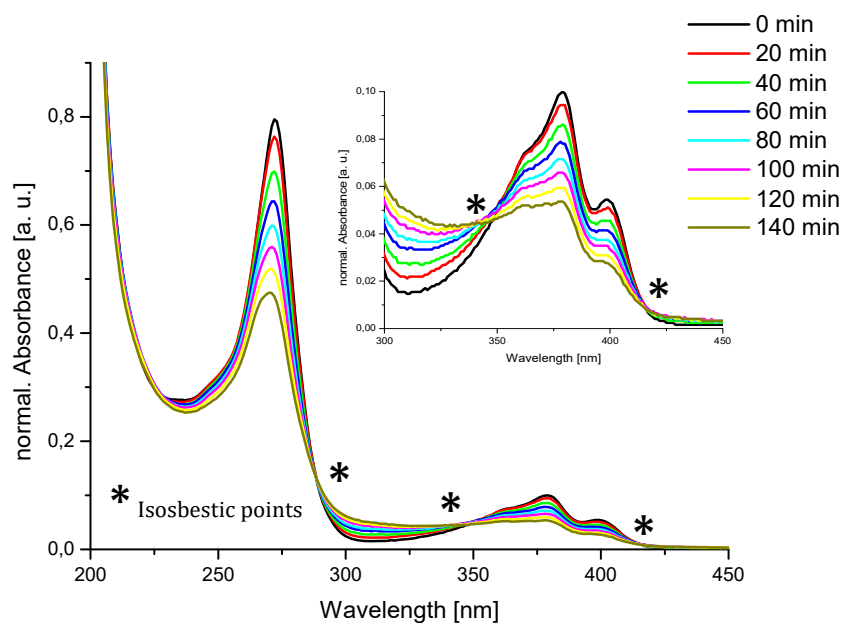

1a in ethanol UV-Vis 254 nm, Ar, c = 10<sup>-5</sup>

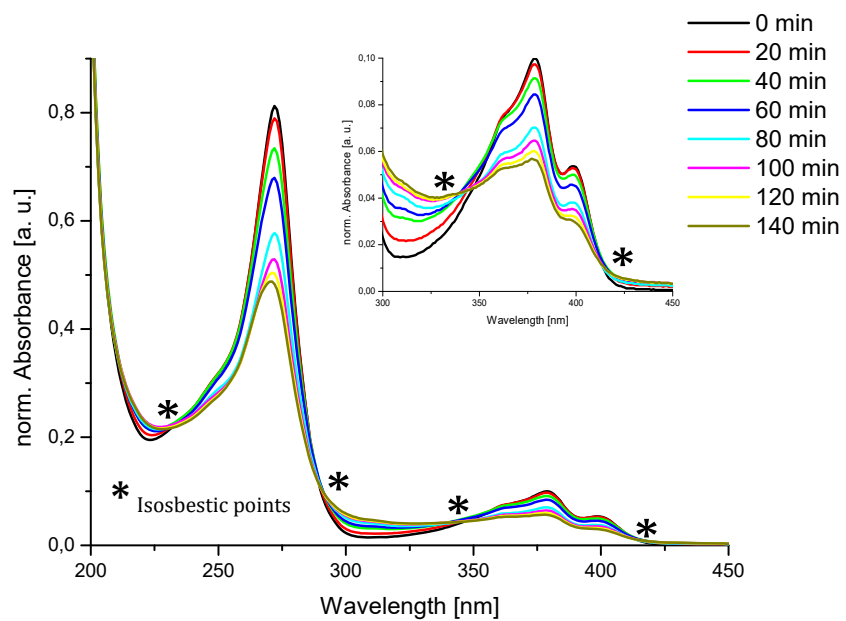

1a in ethanol UV-Vis 365 nm, O<sub>2</sub>, c = 10<sup>-5</sup>

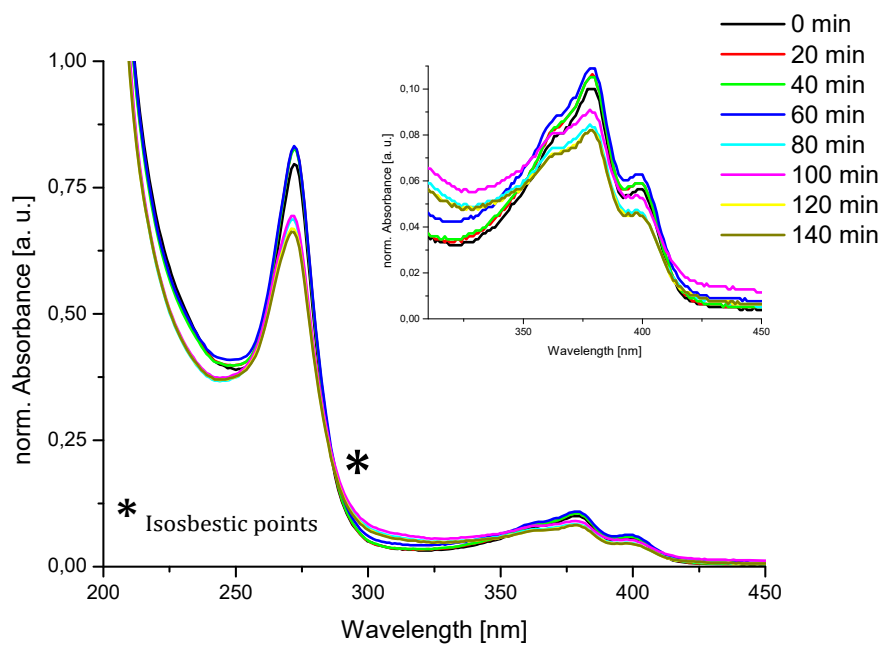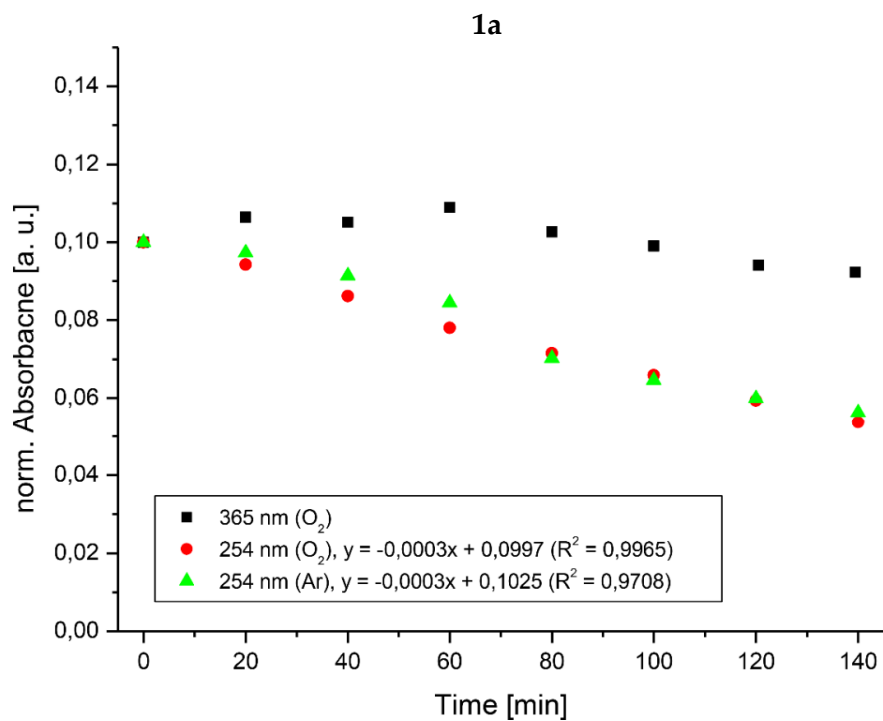

**1b** in ethanol UV-Vis 254 nm, O<sub>2</sub>, c = 10<sup>-5</sup>

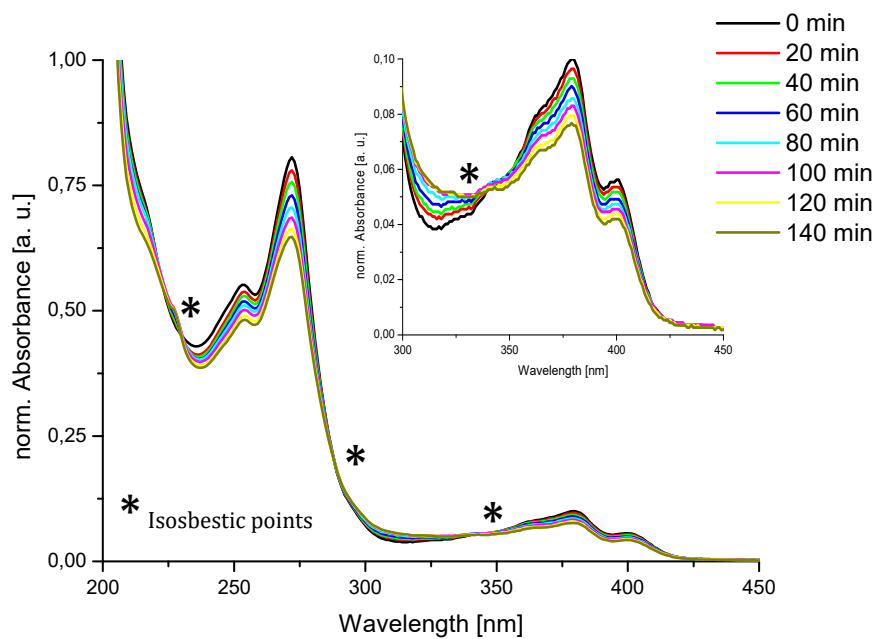

**1b** in ethanol UV-Vis 254 nm, Ar, c = 10<sup>-5</sup>

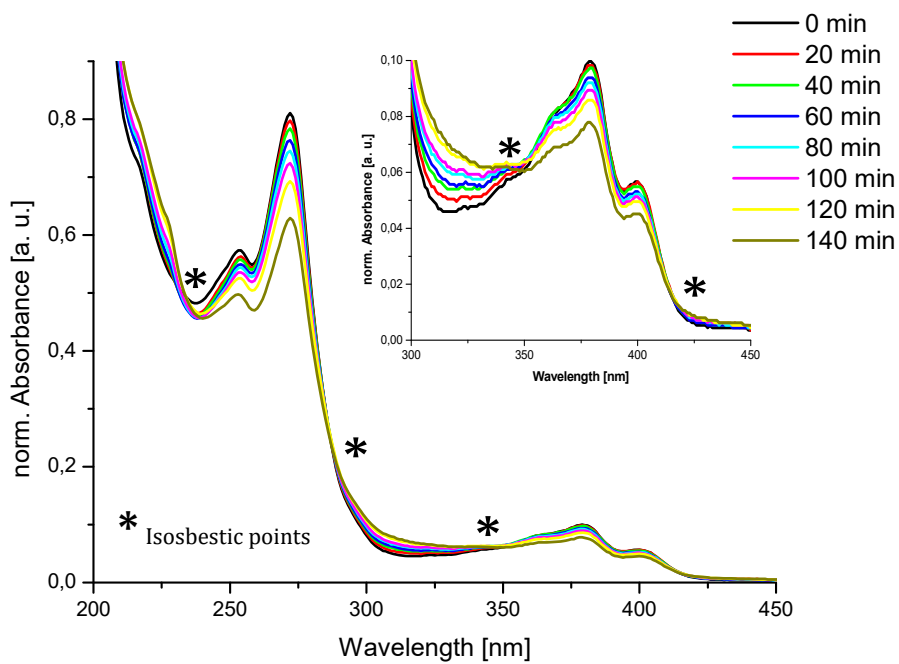

**1b** in ethanol UV-Vis 365 nm, O<sub>2</sub>, c = 10<sup>-5</sup>

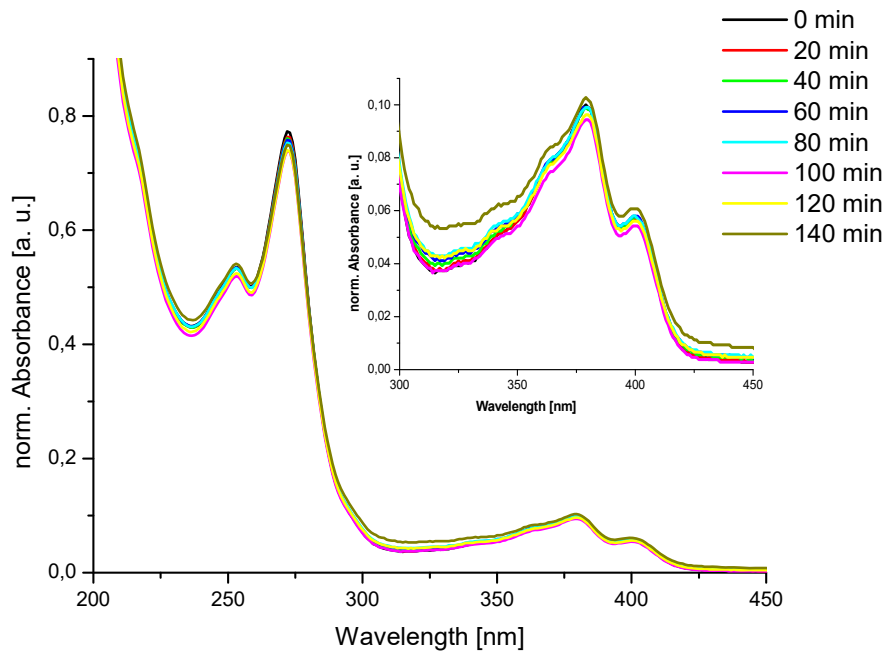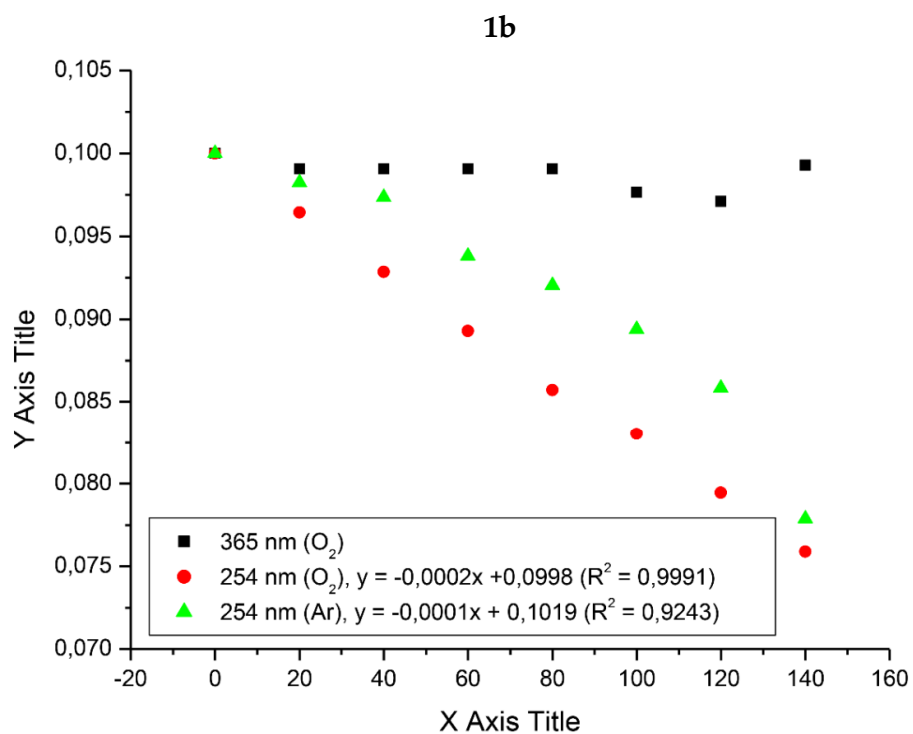

1c in ethanol UV-Vis 254 nm, O<sub>2</sub>, c = 10<sup>-5</sup>

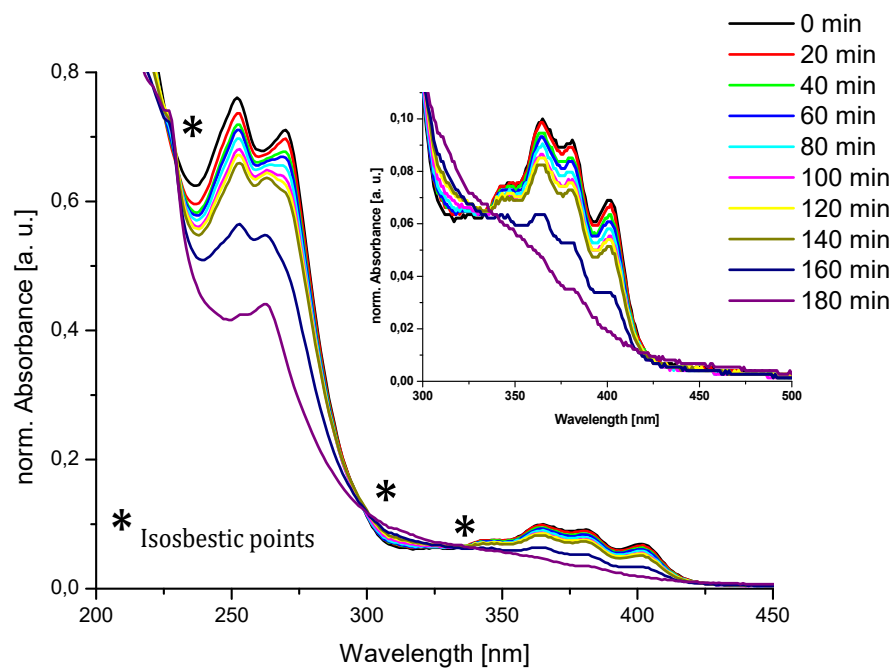

1c in ethanol UV-Vis 254 nm, Ar, c = 10<sup>-5</sup>

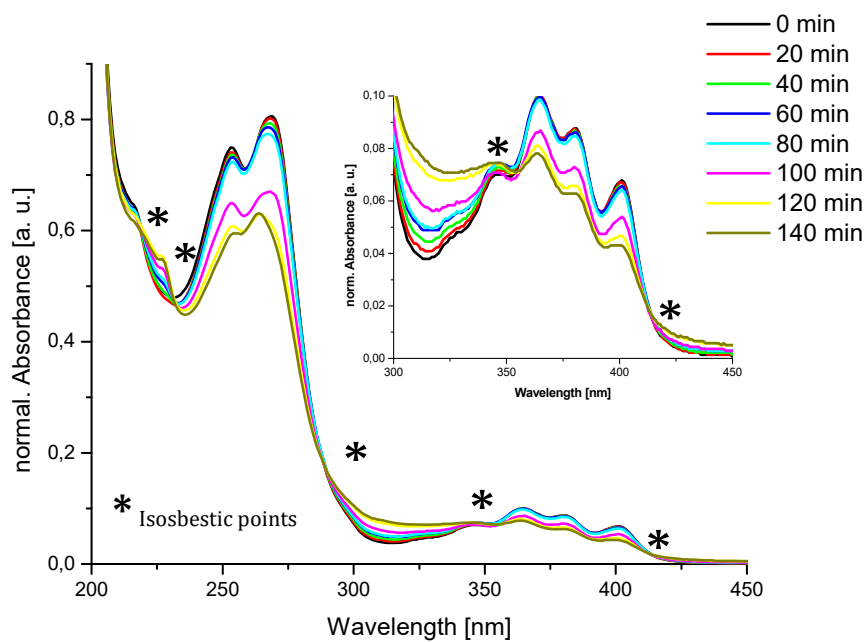

1c in ethanol UV-Vis 365 nm, O<sub>2</sub>, c = 10<sup>-5</sup>

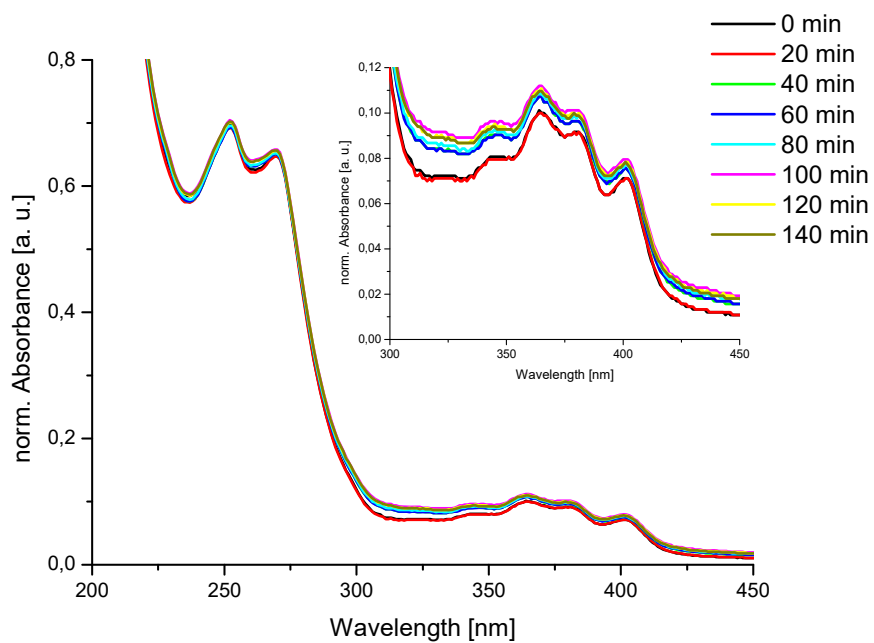

**1c**

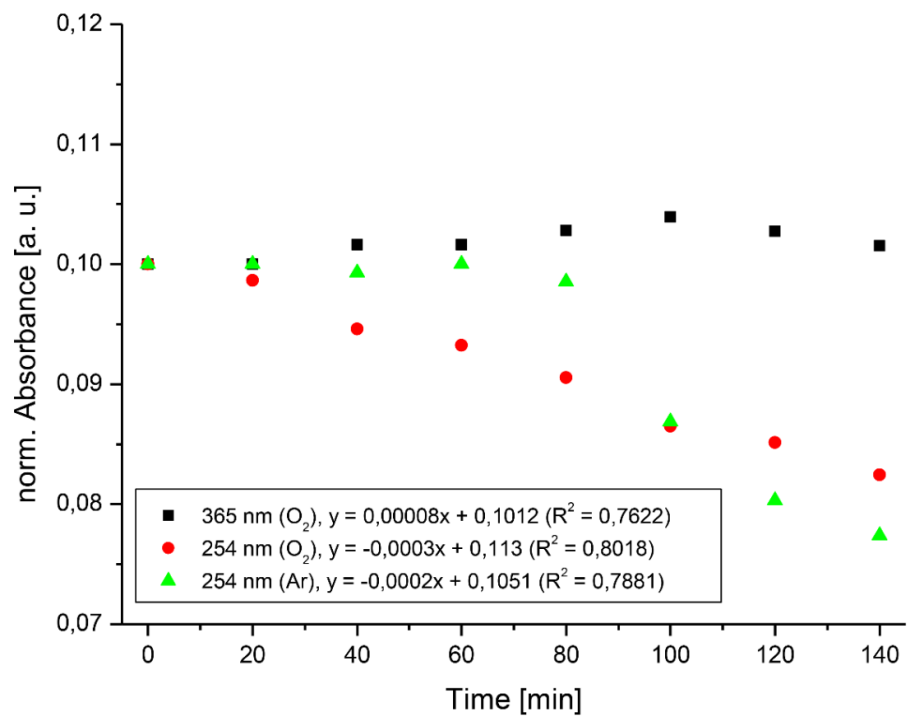

**1d** in ethanol UV-Vis 254 nm, O<sub>2</sub>, c = 10<sup>-5</sup>

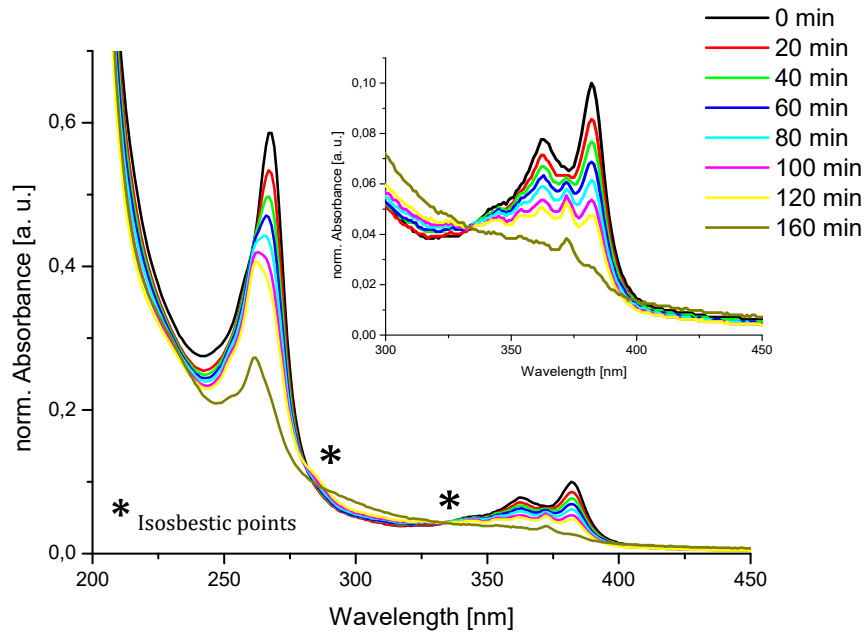

**1d** in ethanol UV-Vis 365 nm, O<sub>2</sub>, c = 10<sup>-5</sup>

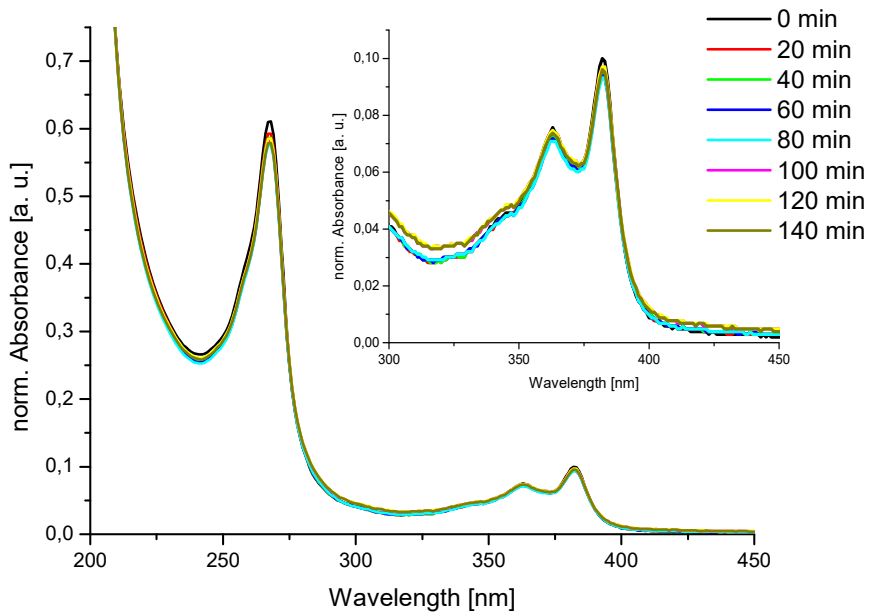

1d

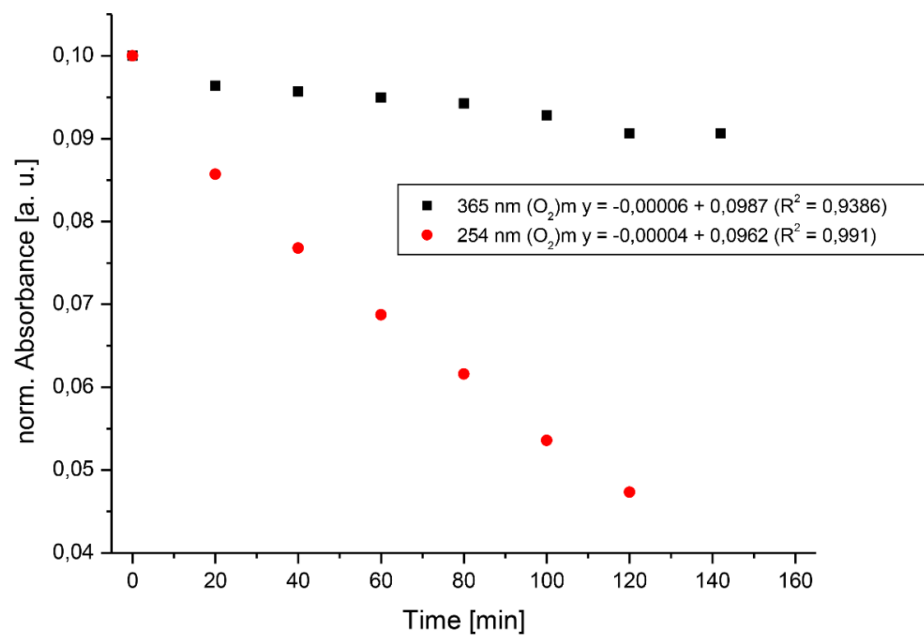

**2a** in ethanol, UV-Vis 254 nm, O<sub>2</sub>, c = 10<sup>-5</sup>M

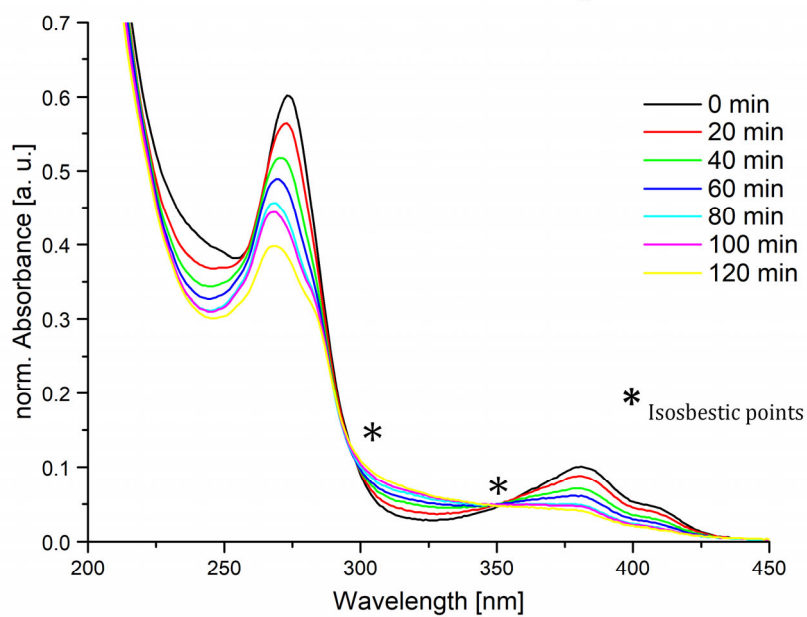

**2a** in ethanol, UV-Vis 254 nm, Ar, c = 10<sup>-5</sup>M

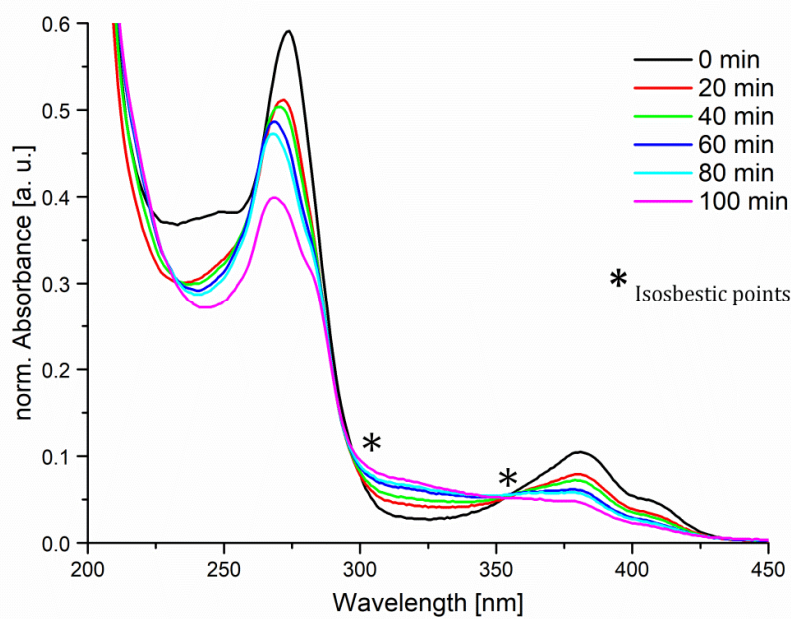

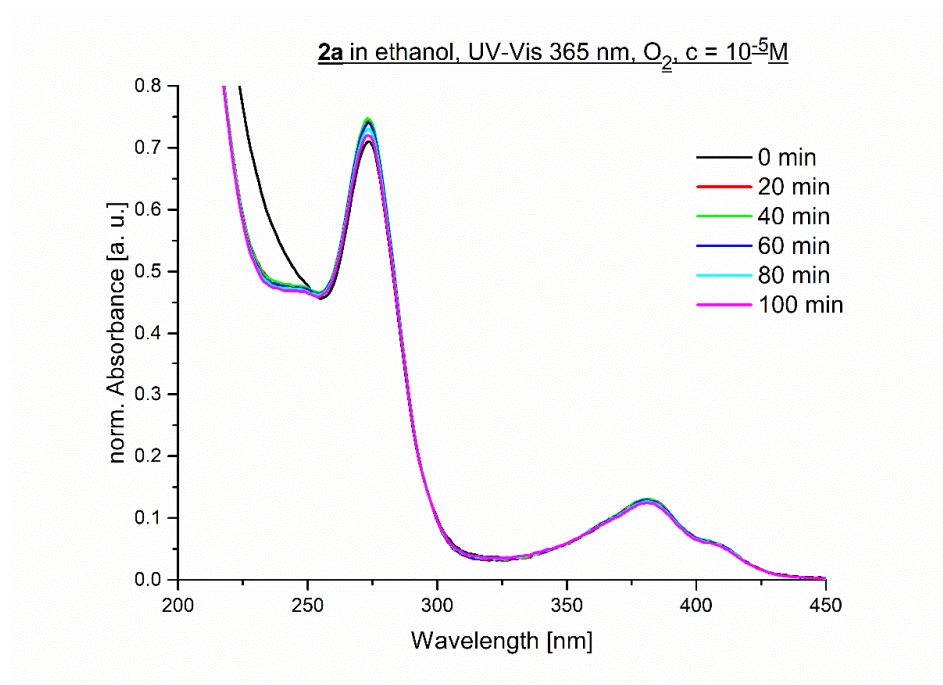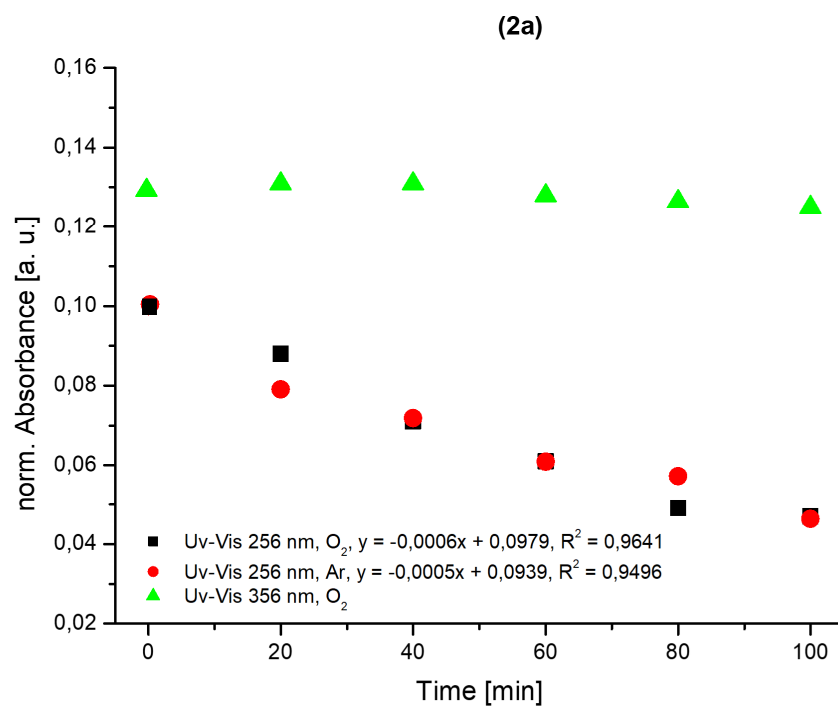

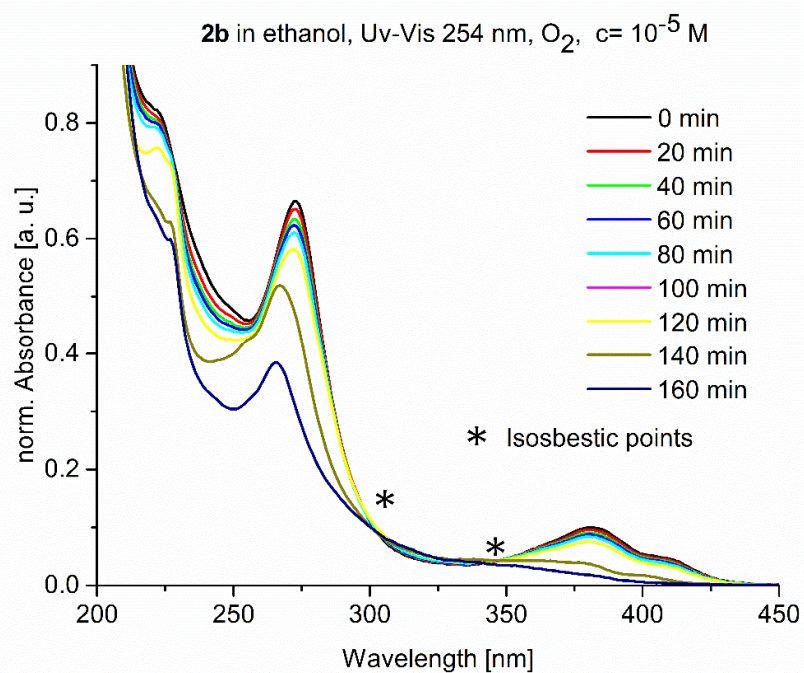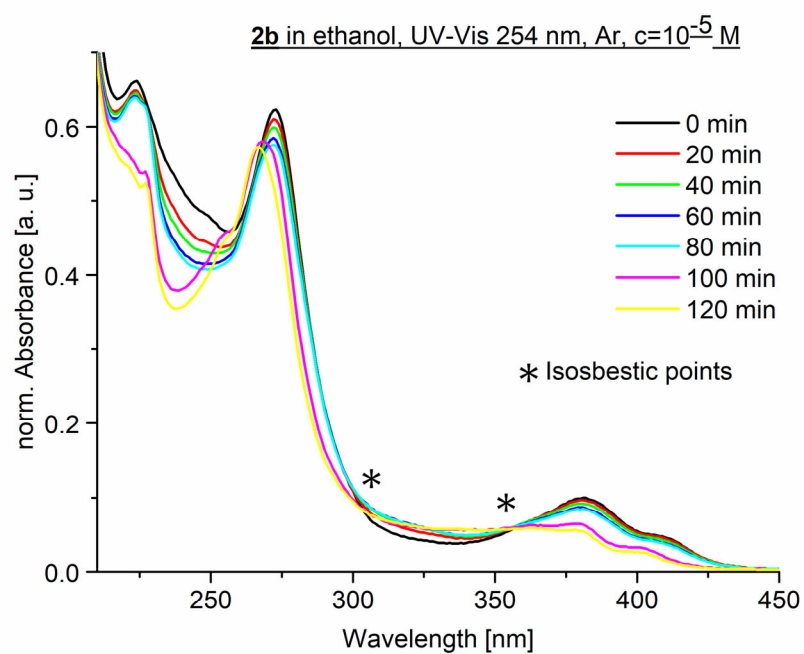

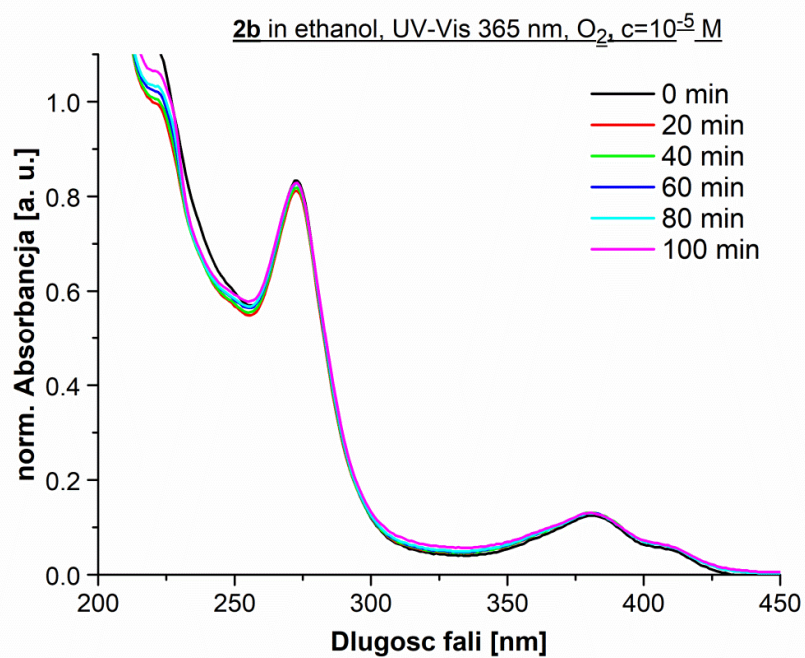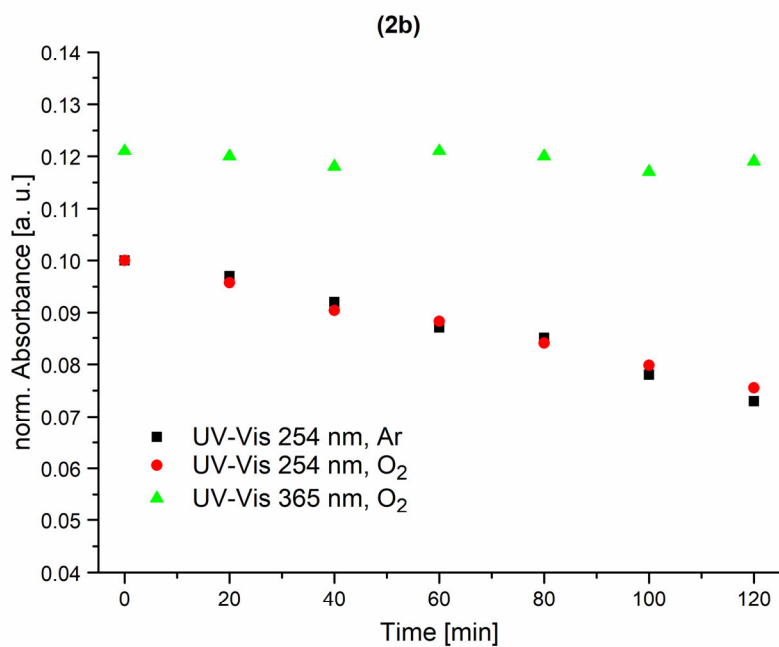

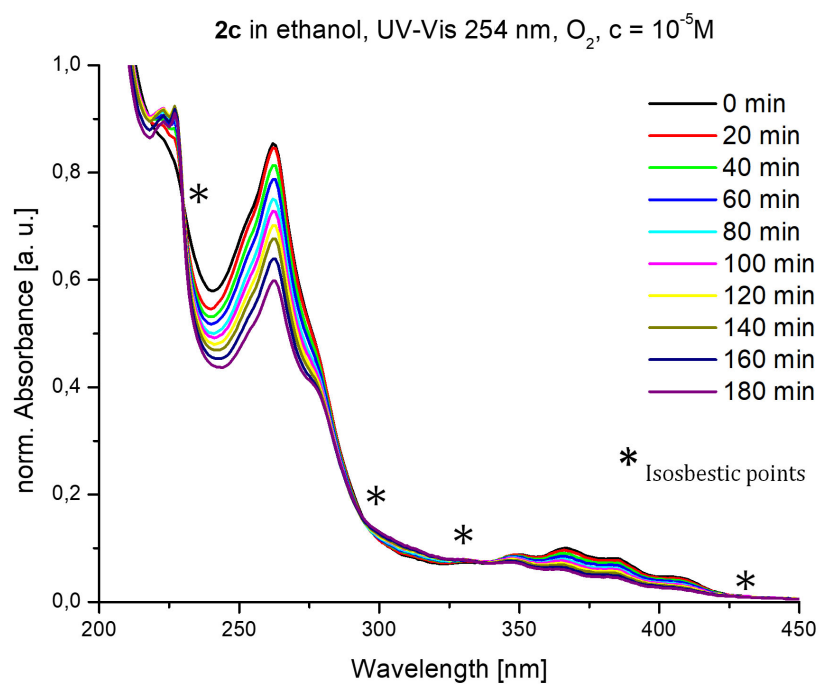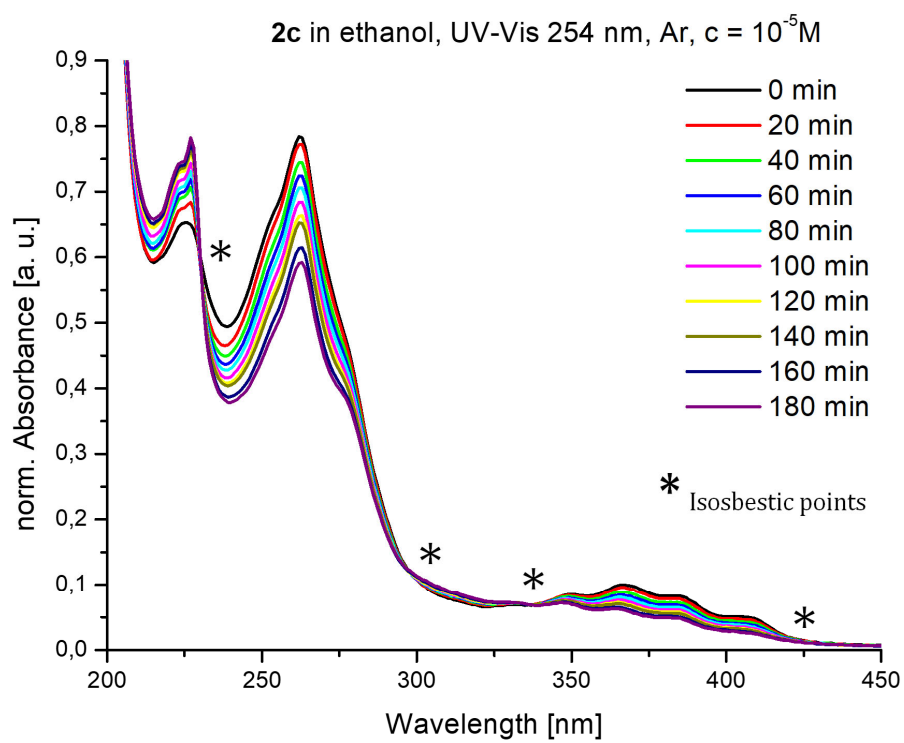

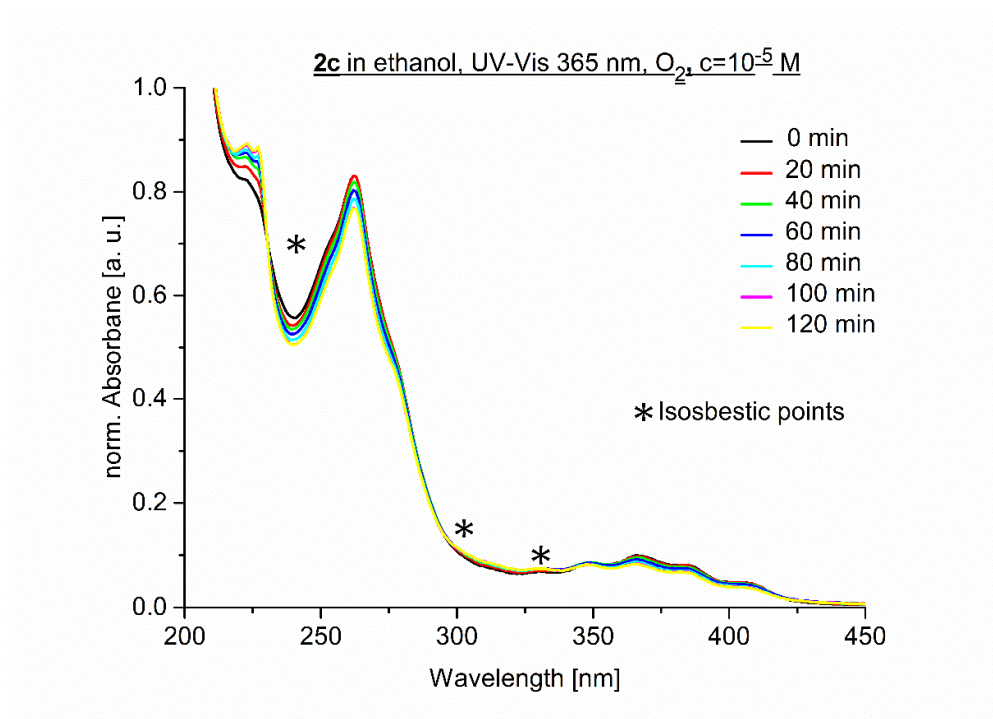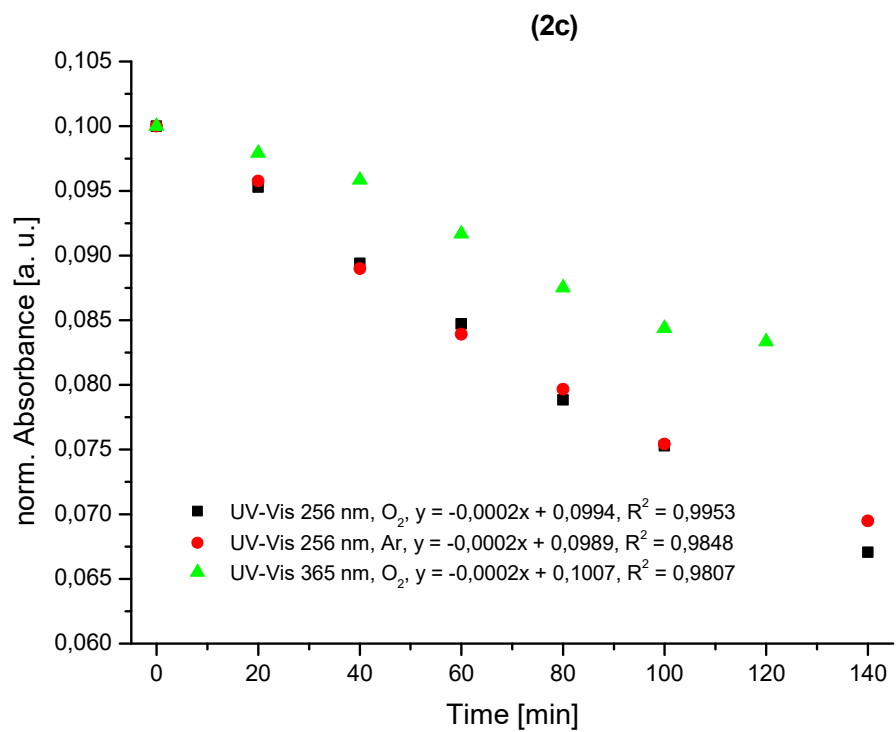

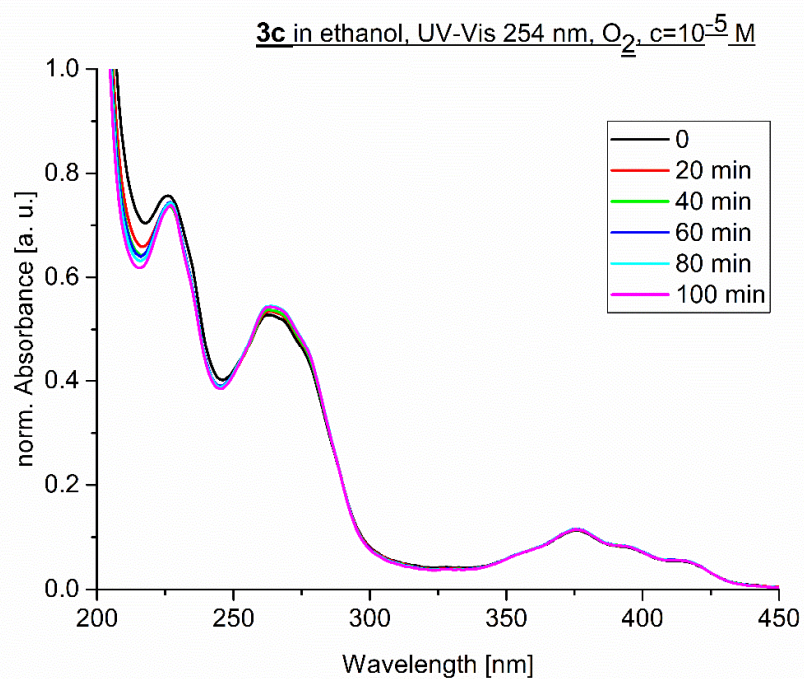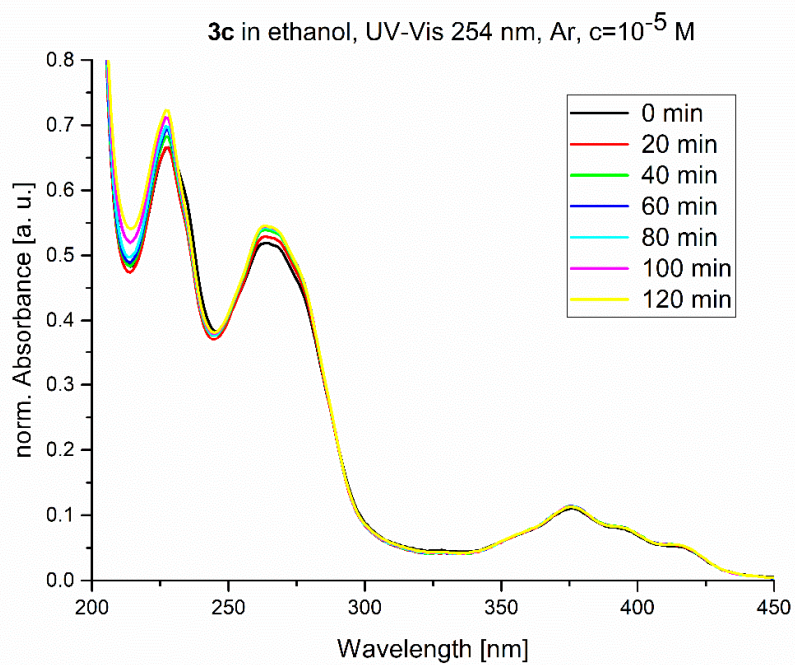

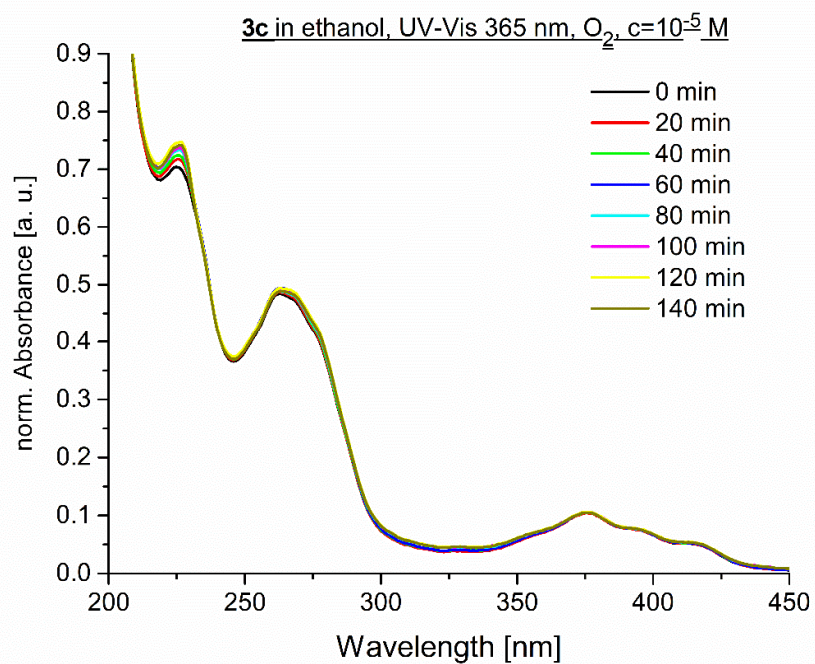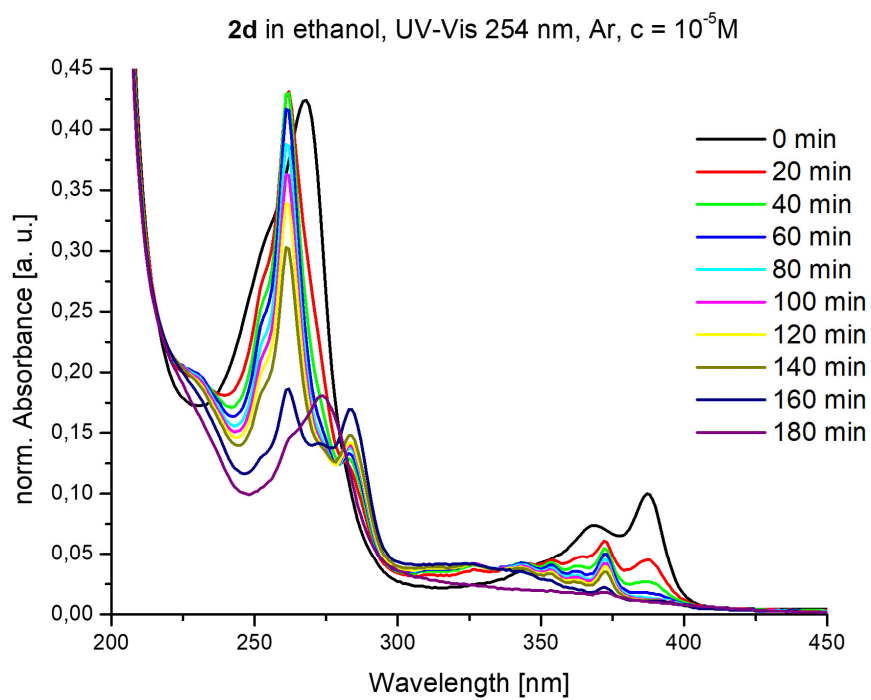

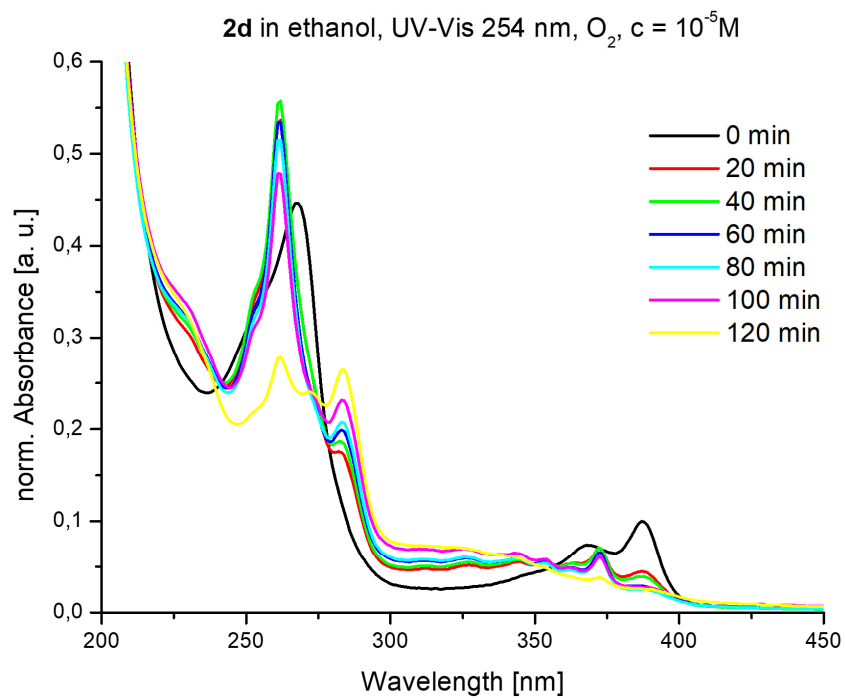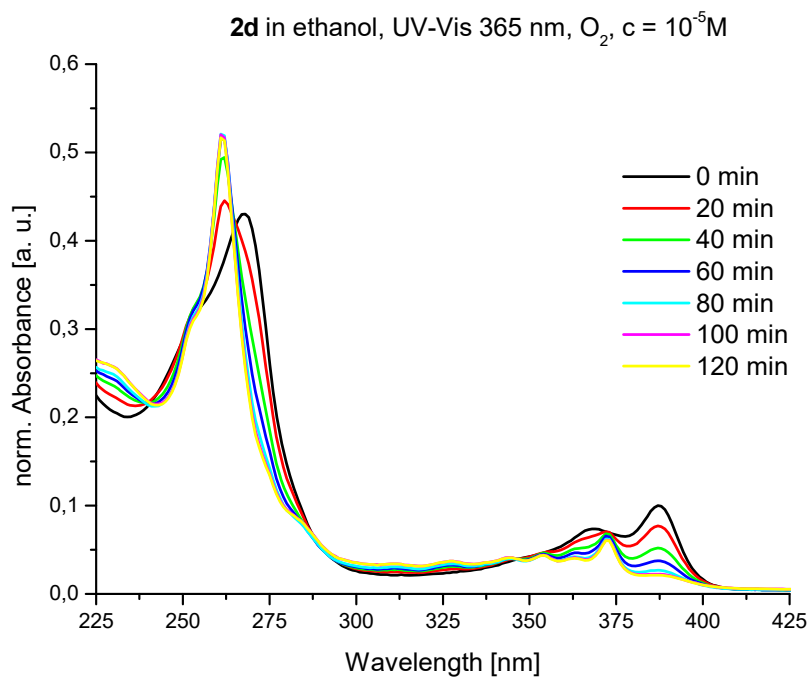

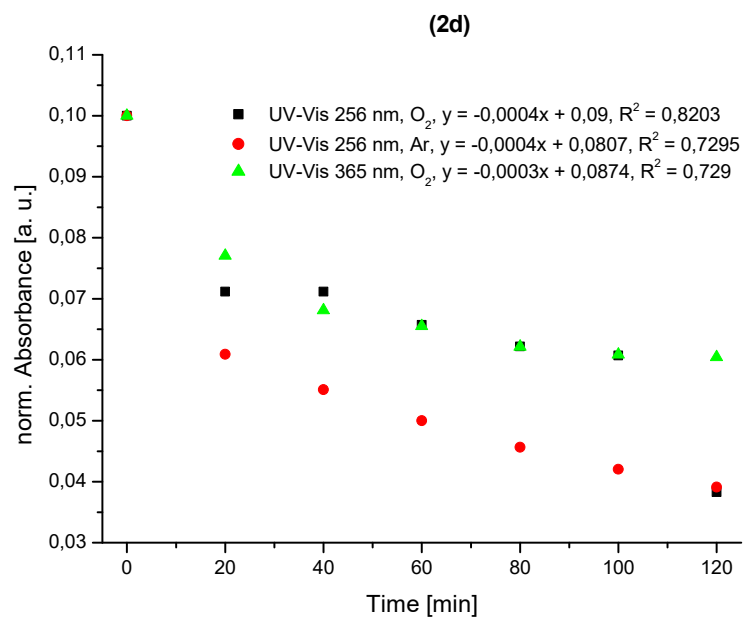

**3d** in ethanol, UV-Vis 254 nm, Ar,  $c = 10^{-5}M$

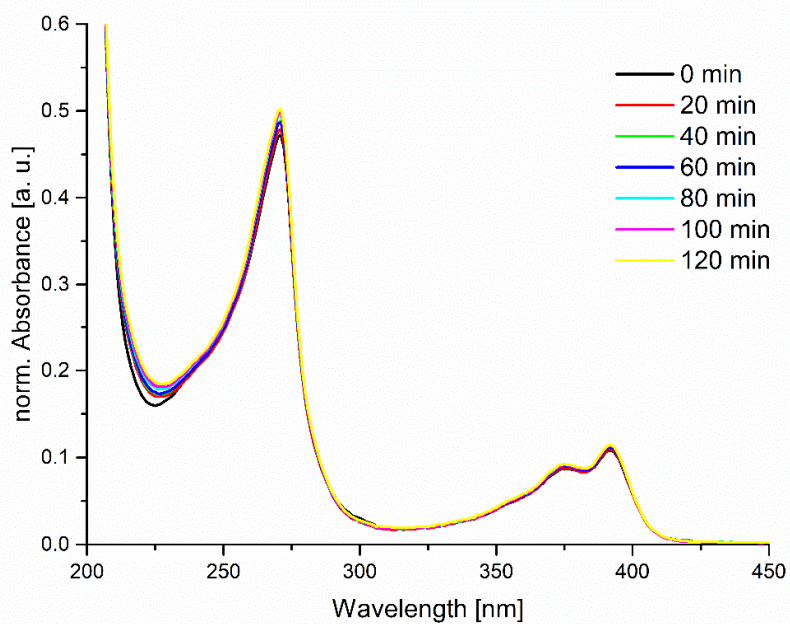

**3d** in ethanol, UV-Vis 365 nm,  $O_2$ ,  $c = 10^{-5}M$

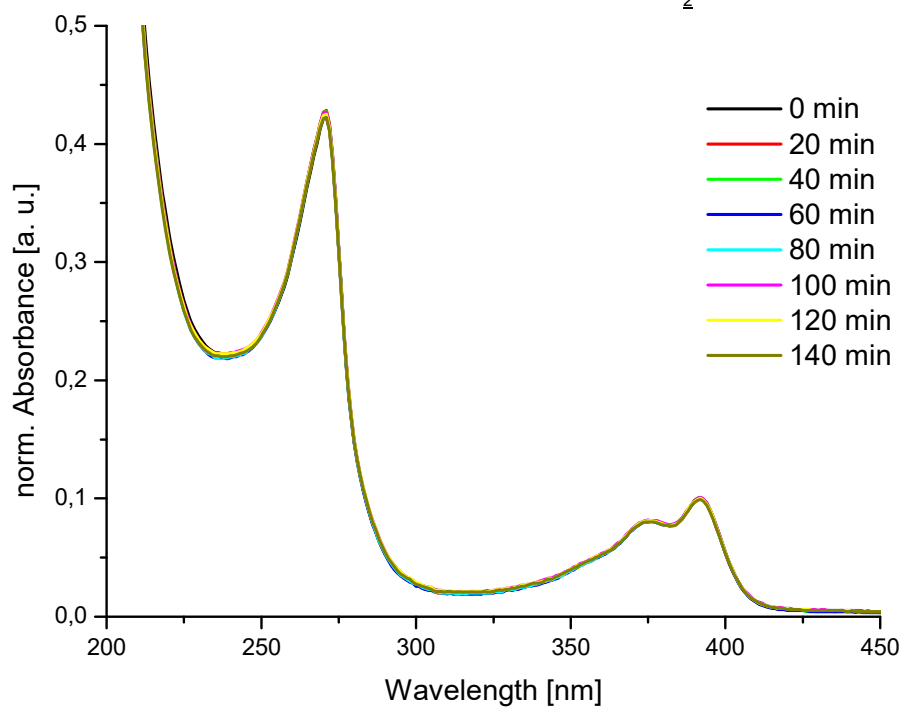

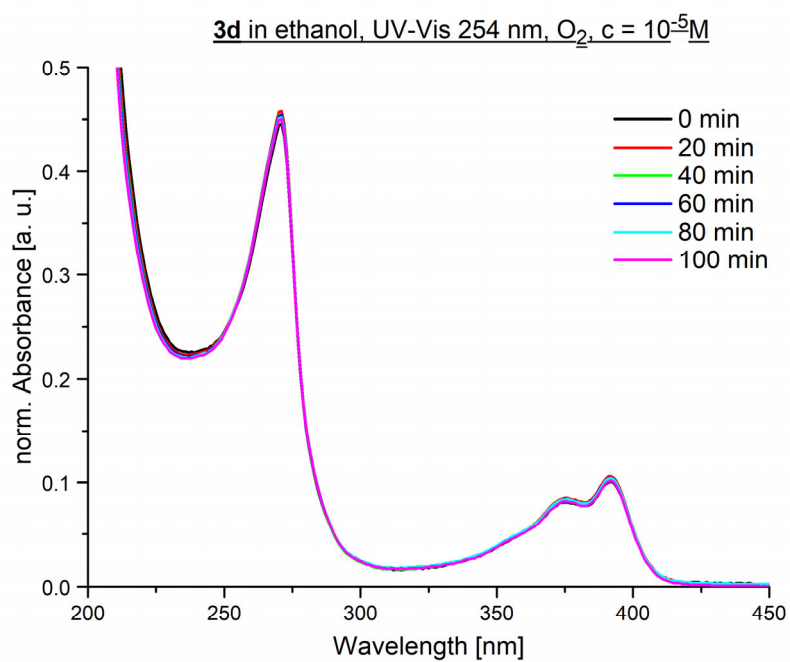

### HRMS-(+)-APCI spectra

The photodegradation was investigated by monitoring the MS spectra of  $10^{-5}$  M ethanolic solutions in quartz cuvettes at room temperature, under ambient atmosphere before and after exposure to UVP-Hg-Pen-ray lamp (254 nm, 16.33 mW/cm<sup>2</sup> at distance 1 cm) for 3 hours (irradiation dose 176 J/cm<sup>2</sup>) and 9 hours (irradiation dose 528 J/cm<sup>2</sup>). In order to distinguish fragmentation peaks from the peaks due to the photo-products in the irradiated mixture, a HR(MS\_MS)-(+)-APCI fragmentation of single peaks in whole spectra was carried out to conclude that the detected peaks for all investigated compounds were due to the real photoproducts in the mixture. The HR(MS\_MS)-(+)-APCI spectra were recorded at 15 eV, 25 eV and 35 eV.

**Figure S9.** HRMS-(+)-APCI spectra of **1a**.

(The right spectrum shows fragmentation of **1a** after irradiation for 3 hours at 254 nm under air O<sub>2</sub> in EtOH and the left spectrum shows fragmentation of the starting acene **1a**)

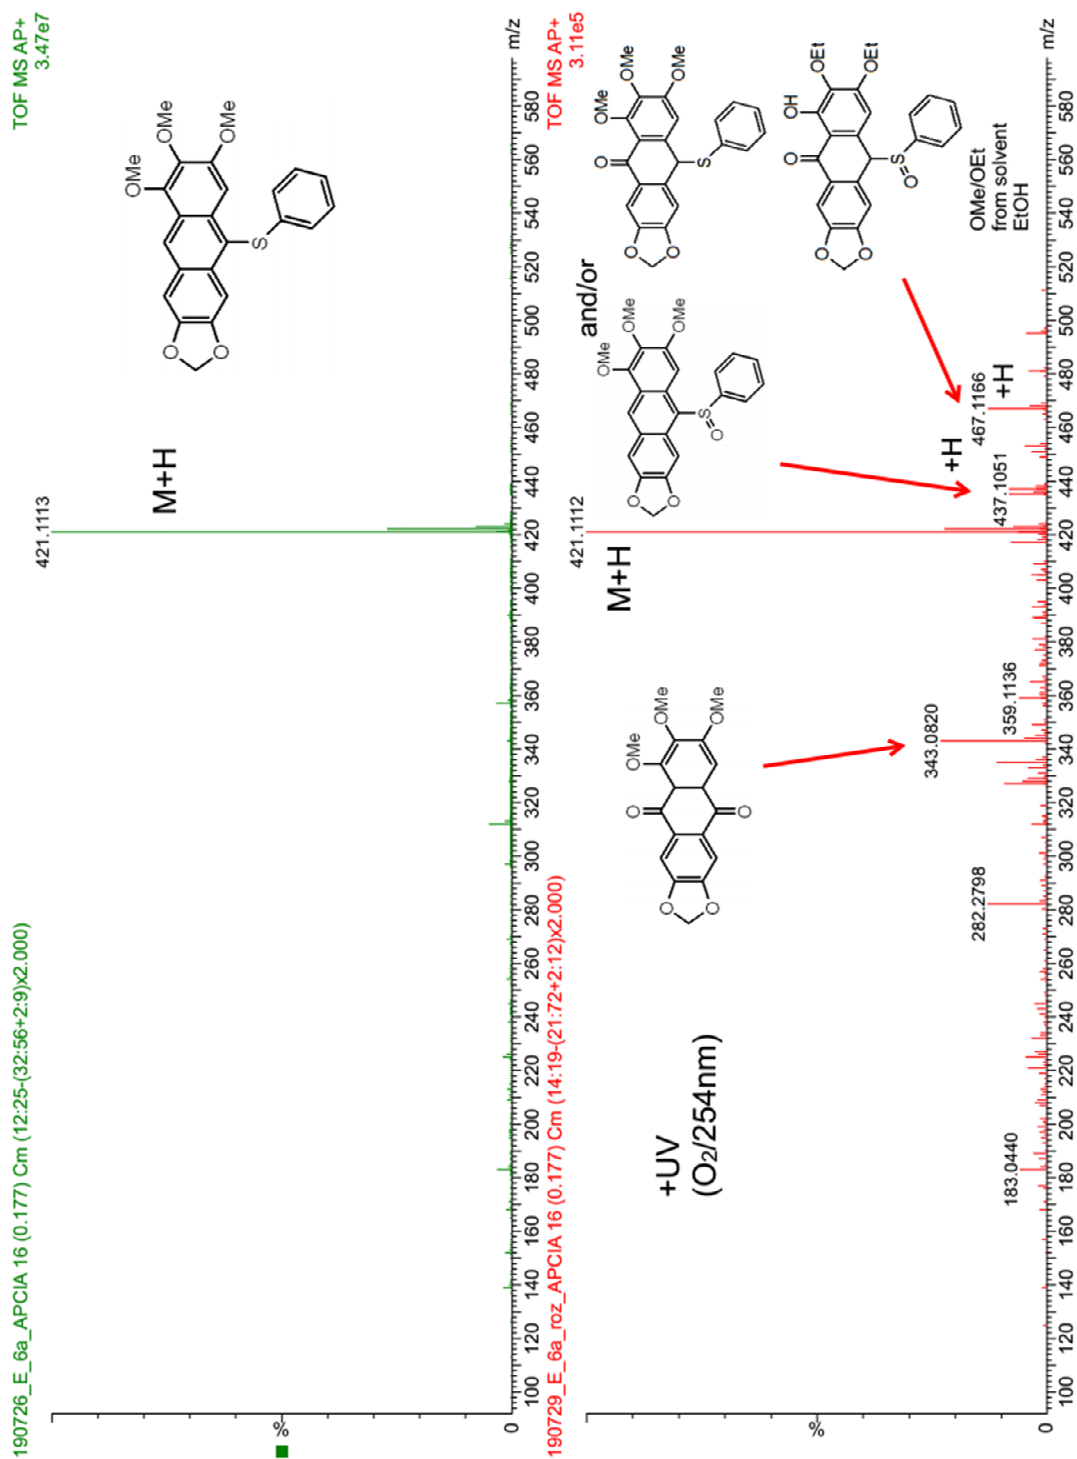

**Figure S10.** HRMS-(+)-APCI spectra of **1b**.

(The right spectrum shows fragmentation of **1b** after irradiation for 3 hours at 254 nm under air O<sub>2</sub> in EtOH and the left spectrum shows fragmentation of the starting acene **1b**)

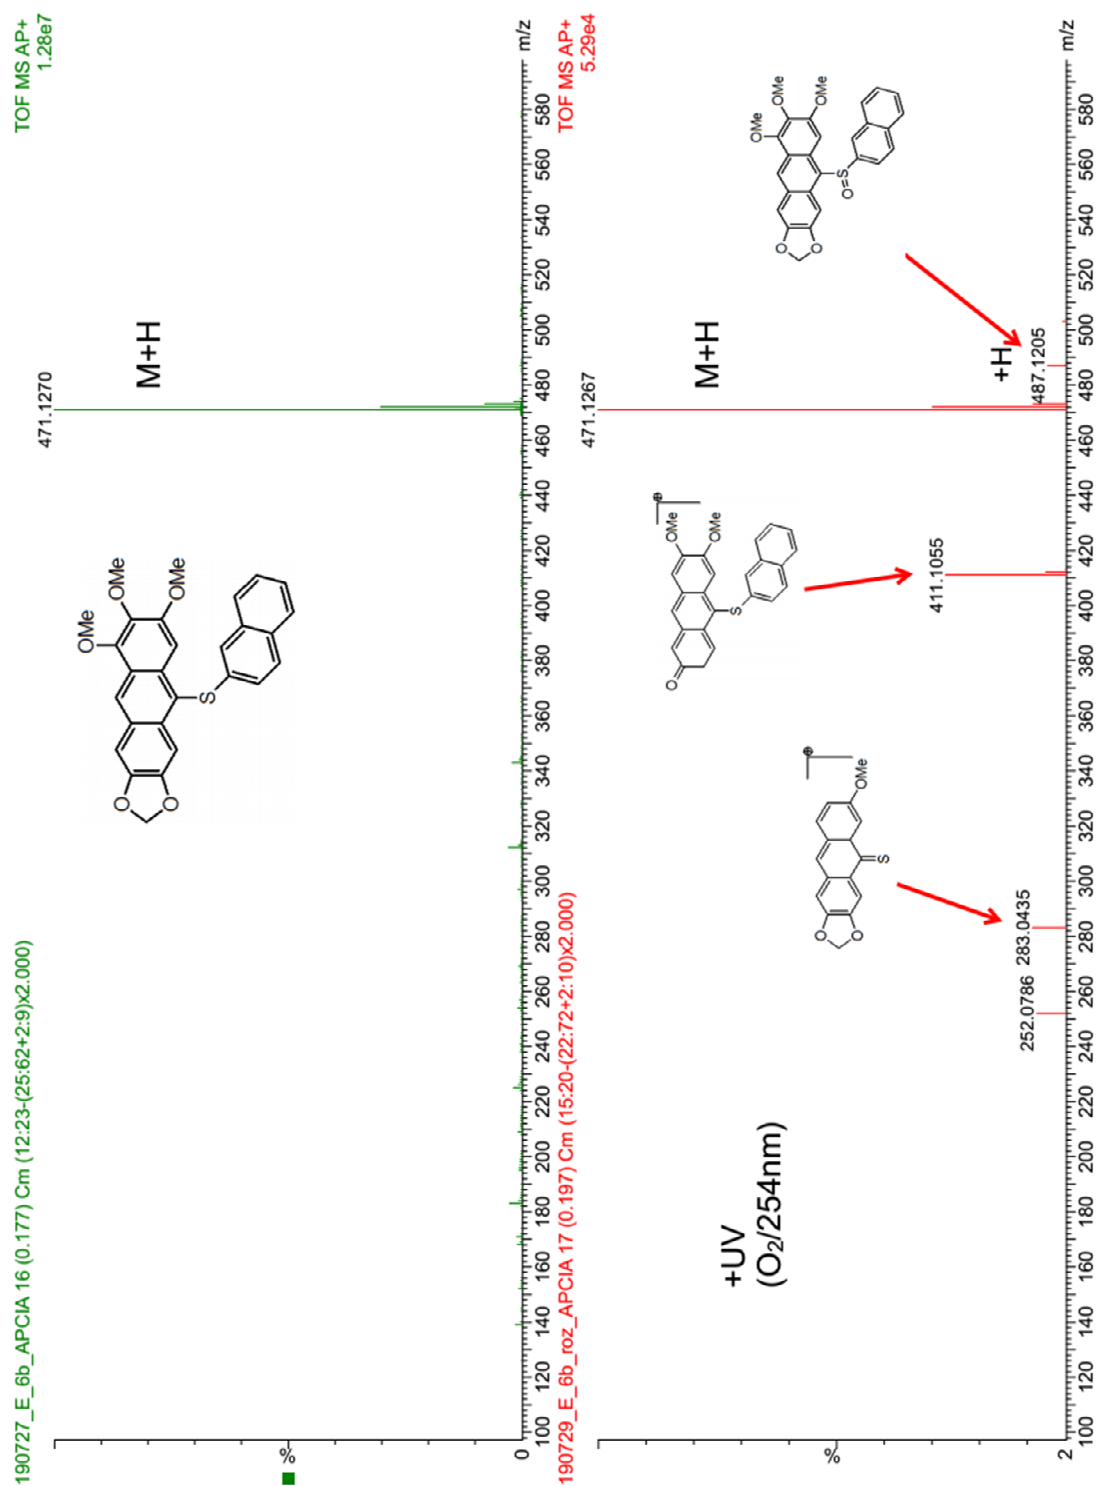

**Figure S11.** HRMS-(+)-APCI spectra of **1d**.

(The right spectrum shows fragmentation of **1d** after irradiation for 3 hours at 254 nm under air O<sub>2</sub> in EtOH and the left spectrum shows fragmentation of the starting acene **1d**)

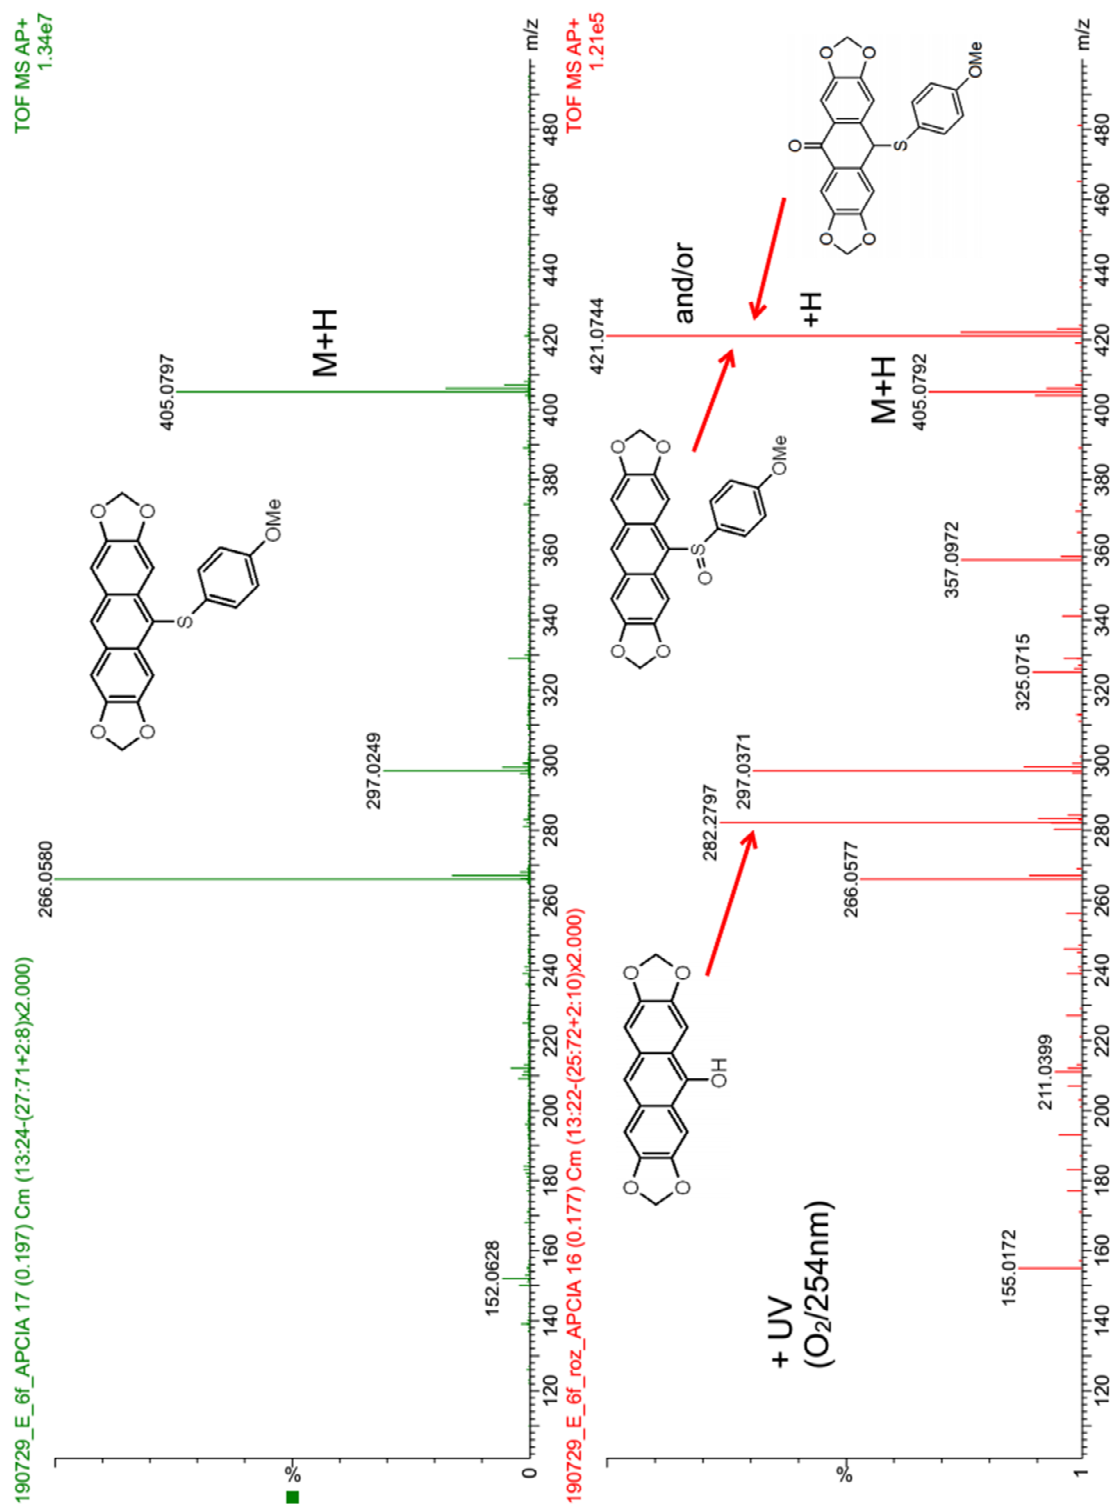

**Figure S12.** HRMS-(+)-APCI spectra of **2a**.

(The left spectrum shows fragmentation of **2a** after irradiation for 3 hours at 254 nm under air O<sub>2</sub> in EtOH and the right spectrum shows fragmentation of the starting acene **2a**)

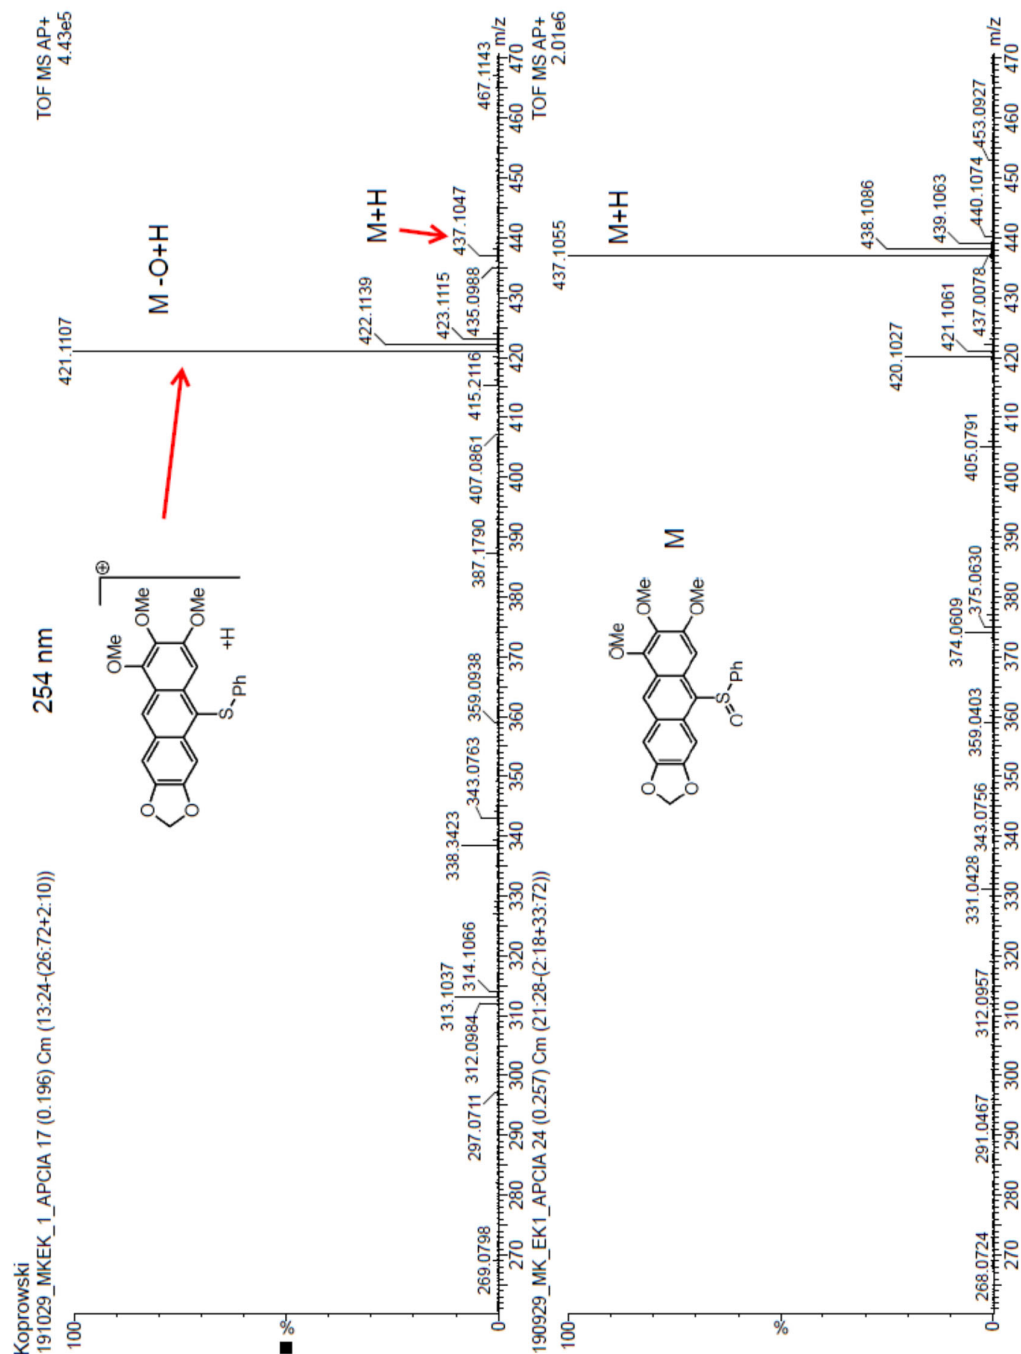

The HRMS-(+)-APCI spectrum of ethanolic solution of **2a** after irradiation for 9 hours at 254 nm

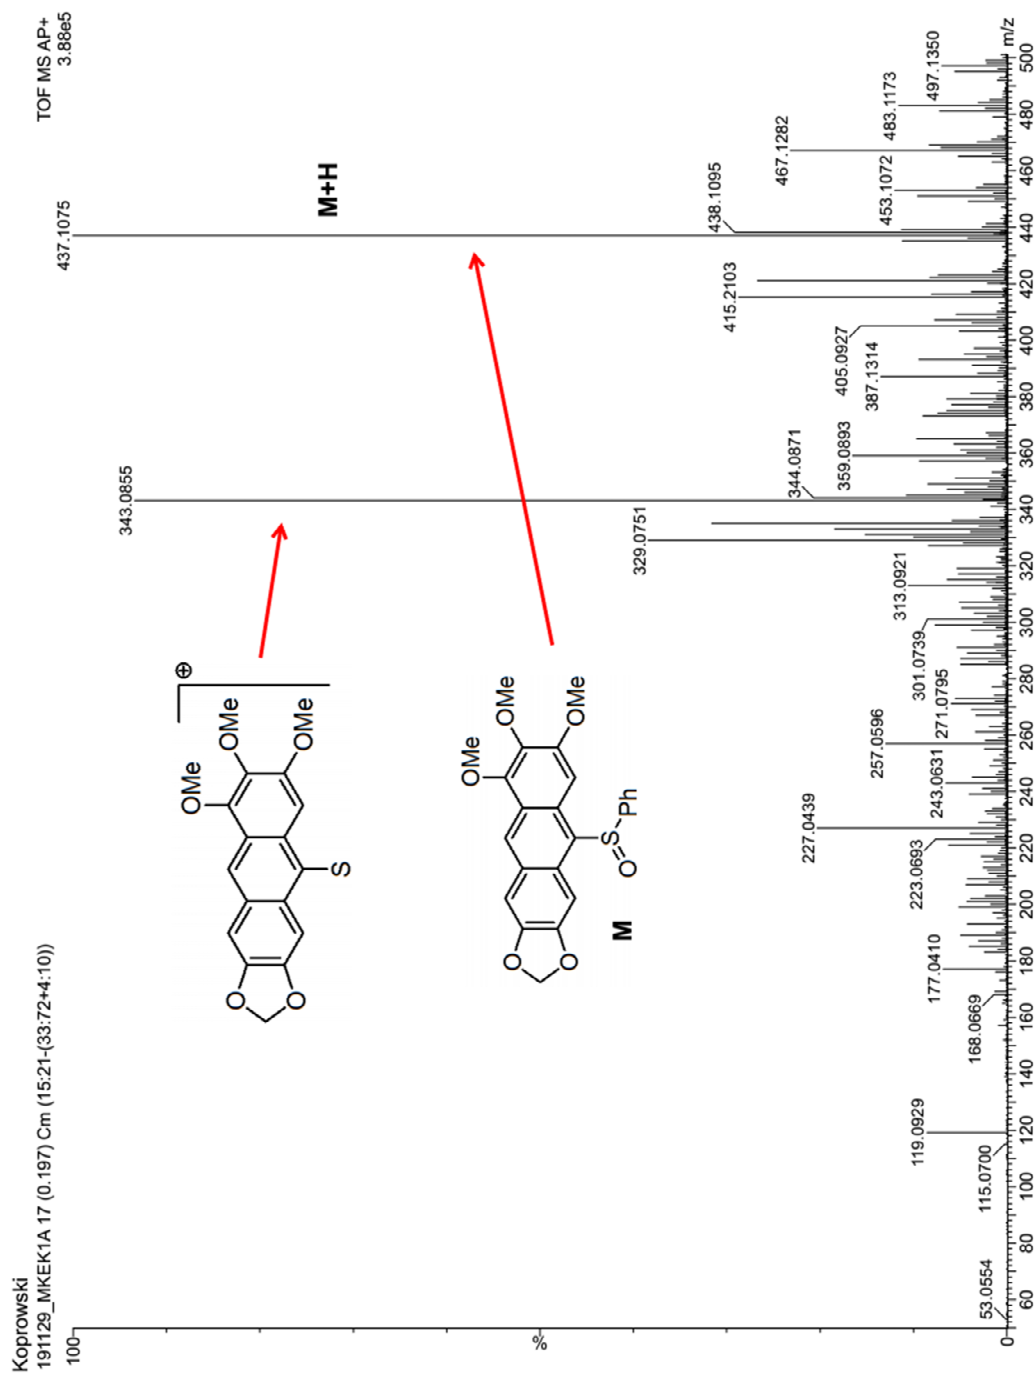

The HR(MS\_MS)-(+)-APCI fragmentation spectrum of the peak at  $m/z = 421$  (15eV) after irradiation of ethanolic solution of **2a** for 9 hours at 254 nm

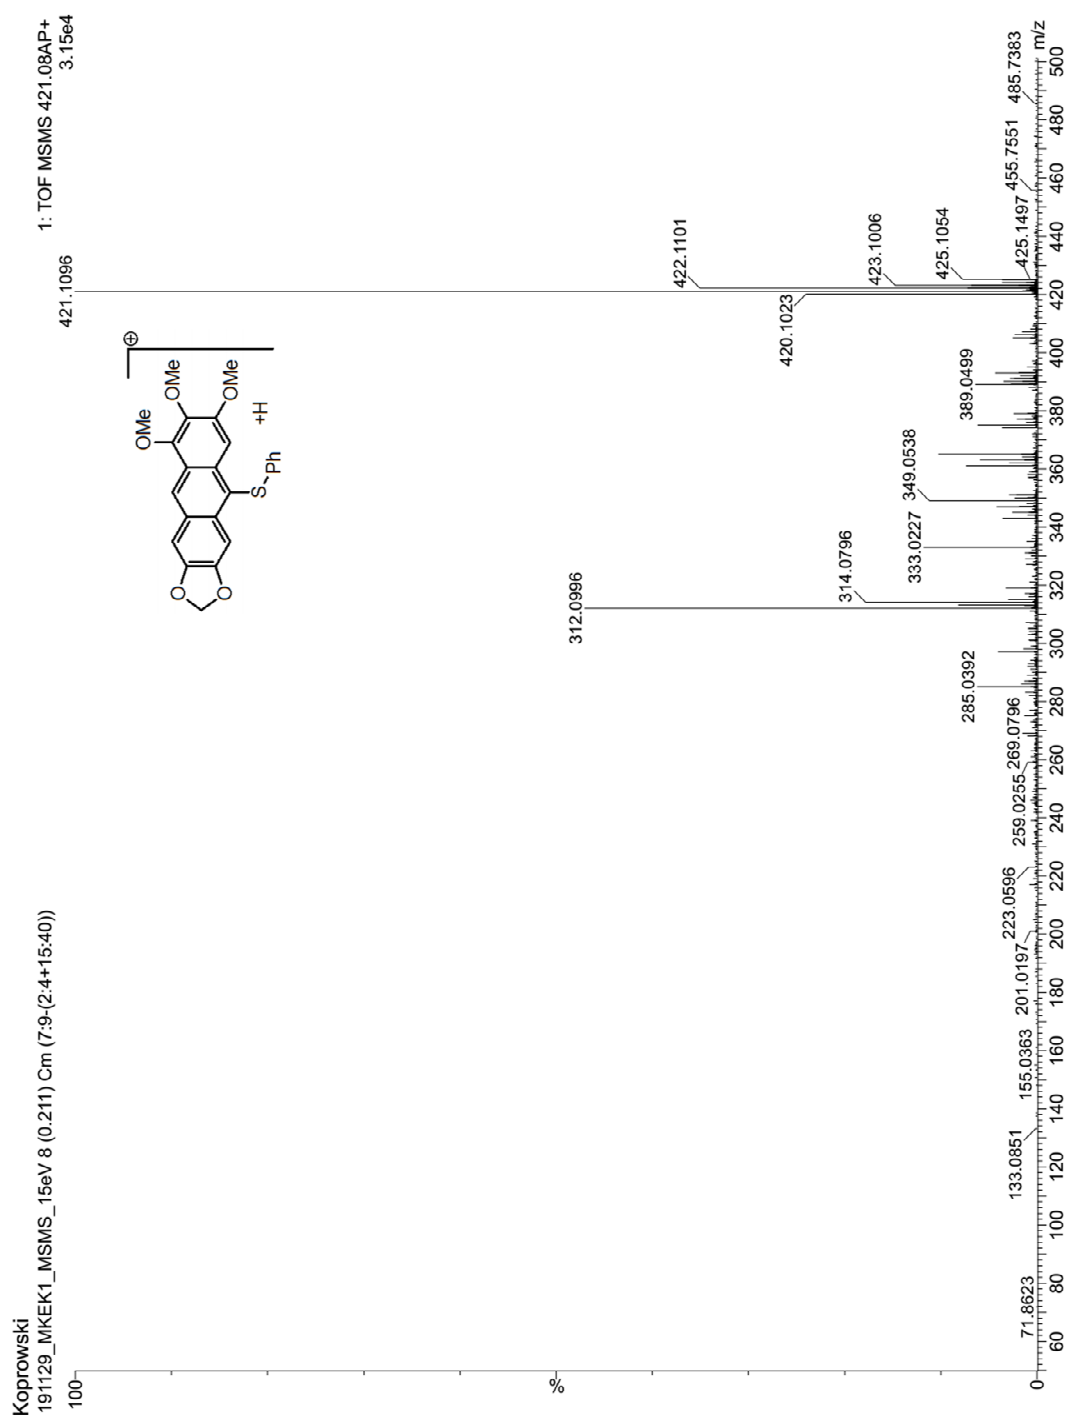

The HR(MS\_MS)-(+)-APCI fragmentation spectrum of the peak at  $m/z = 421$  (25eV) after irradiation of ethanolic solution of **2a** for 9 hours at 254 nm

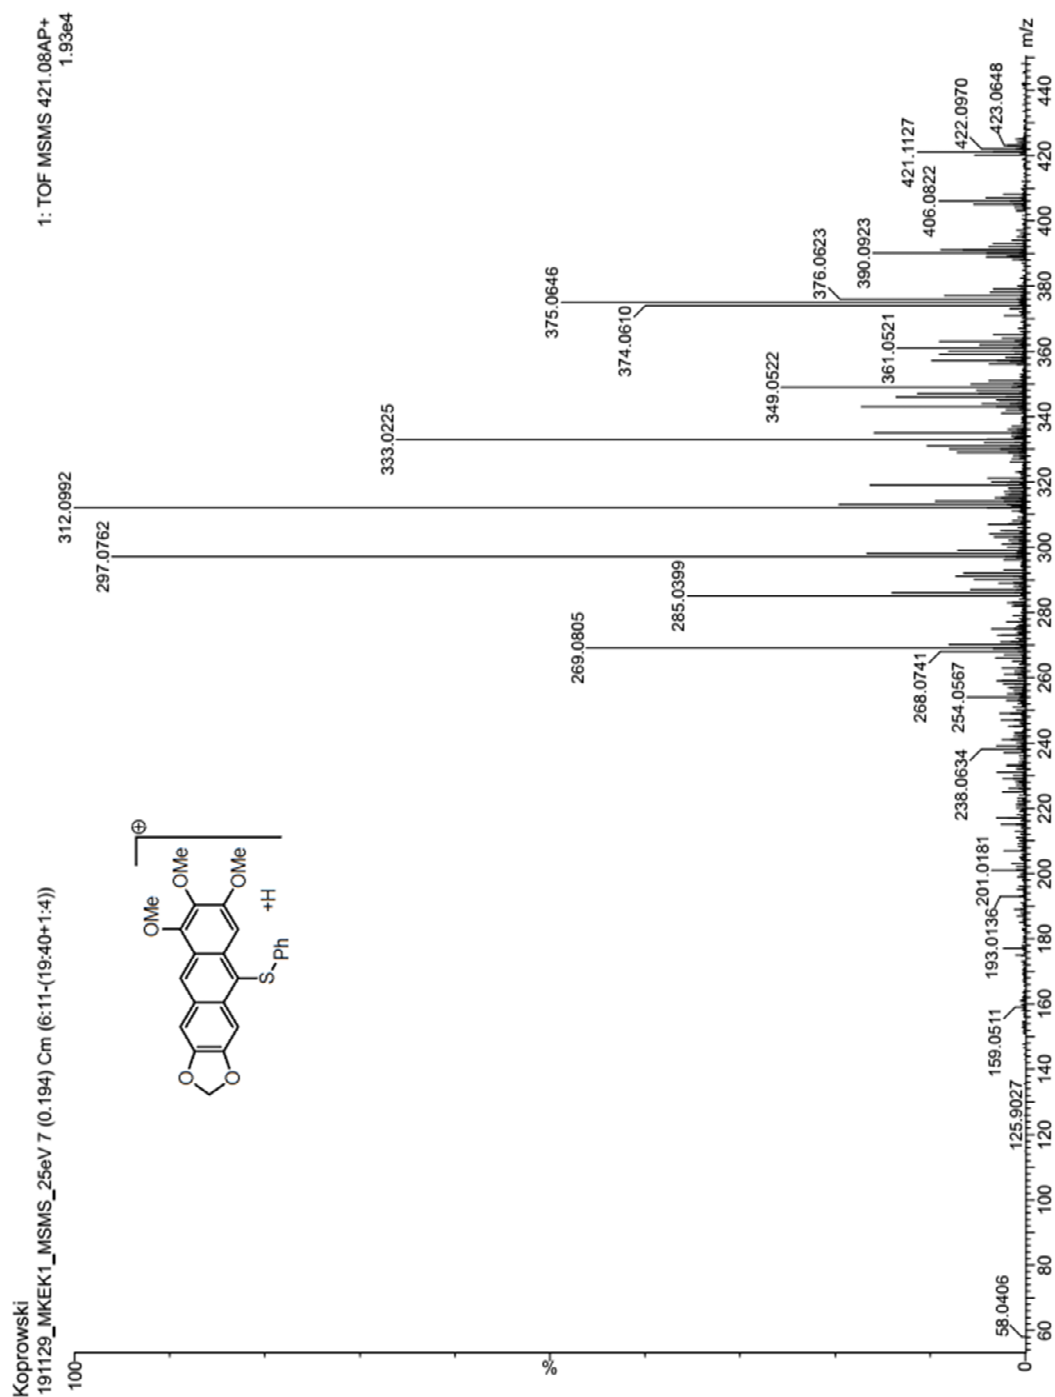

**Figure S13.** HRMS-(+)-APCI spectra of **2d**.

(The left spectrum shows fragmentation of **2d** after irradiation for 3 hours at 254 nm under air O<sub>2</sub> in EtOH and the right spectrum shows fragmentation of the starting acene **2d**)



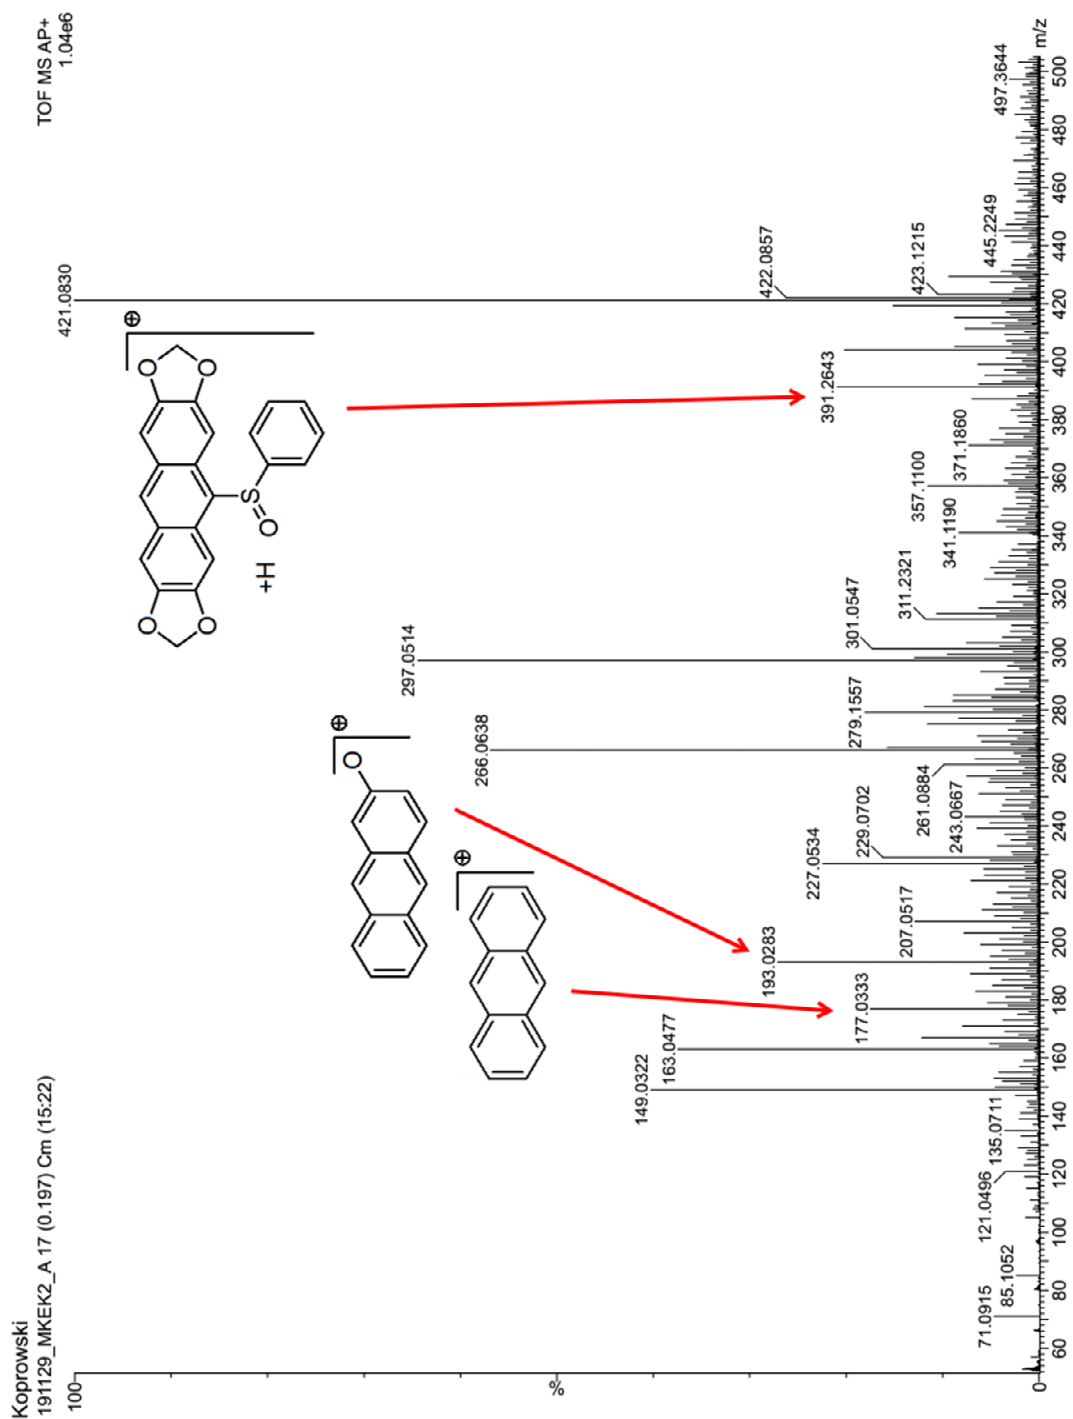

The HR(ESI)-MS fragmentation spectrum of the peak at  $m/z = 266$  (25eV) after irradiation of ethanolic solution of **2d** for 9 hours at 254 nm

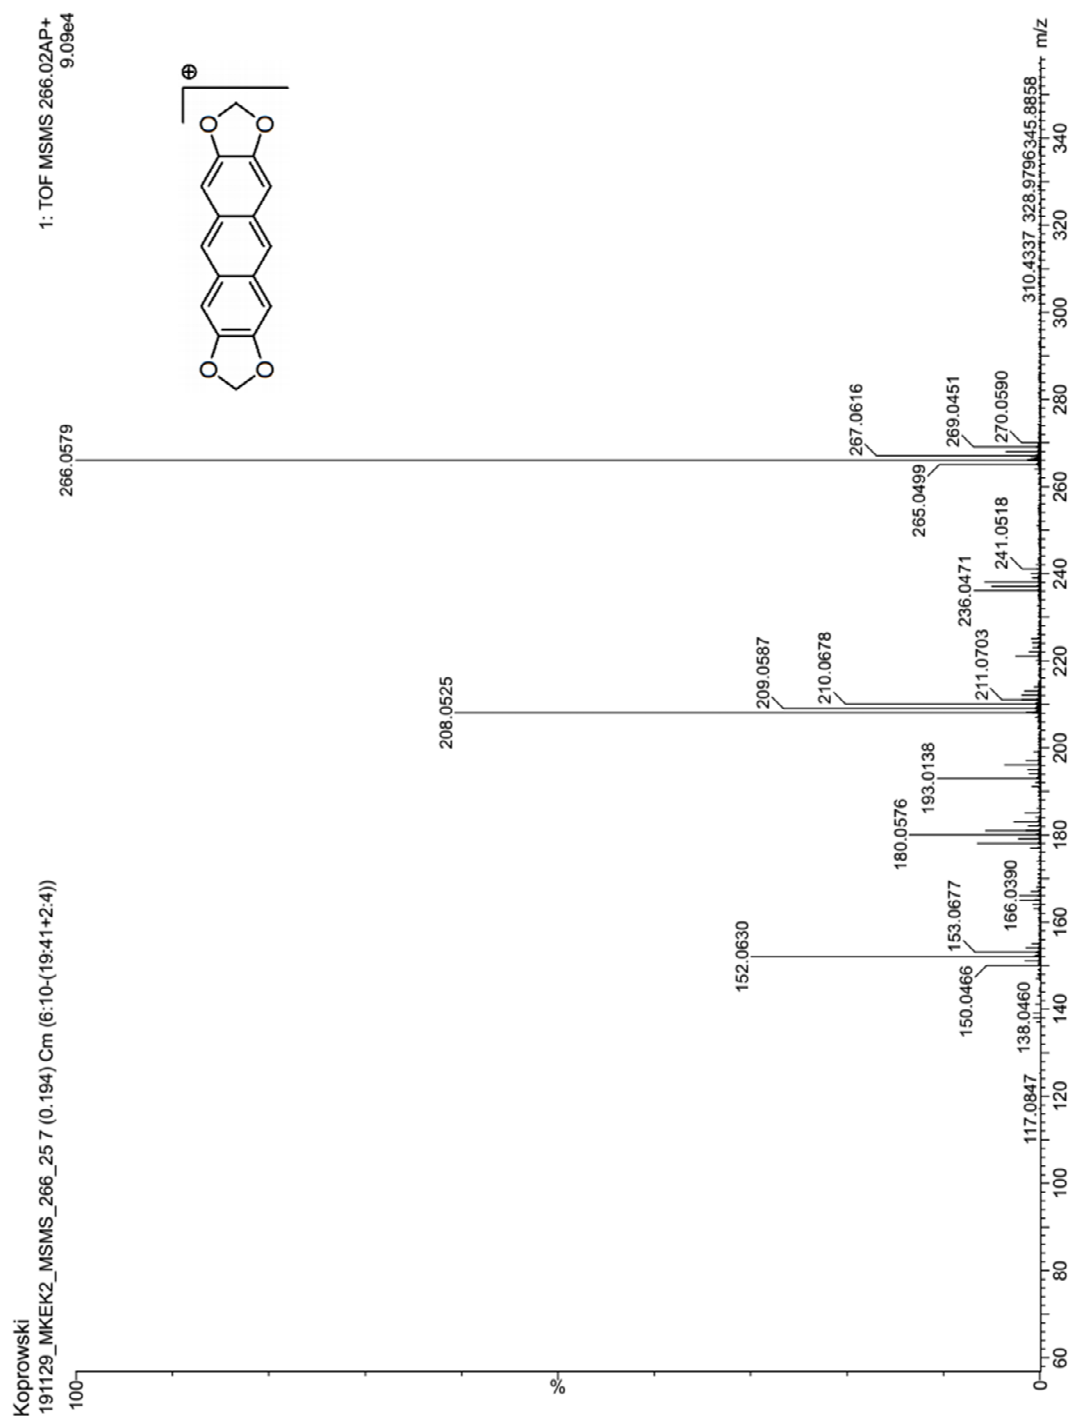

The HR(MS\_MS)-(+)-APCI fragmentation spectrum of the peak at  $m/z = 266$  (35eV) after irradiation of ethanolic solution of **2d** for 9 hours at 254 nm

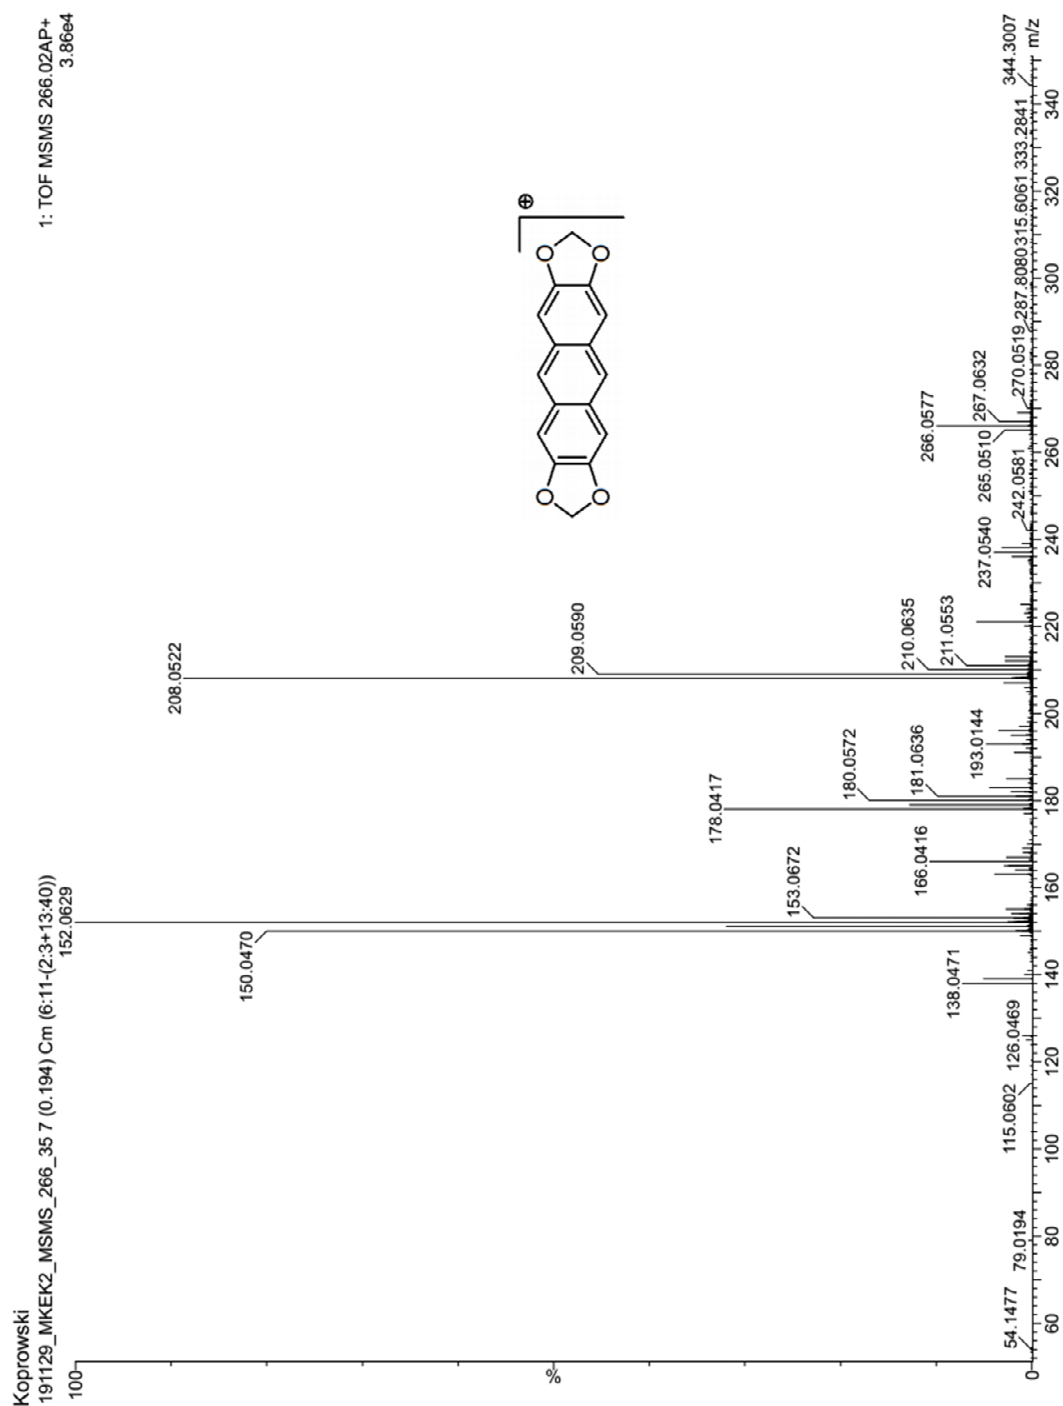

The HR(MS\_MS)-(+)-APCI fragmentation spectrum of the peak at  $m/z = 297$  (25eV) after irradiation of ethanolic solution of **2d** for 9 hours at 254 nm

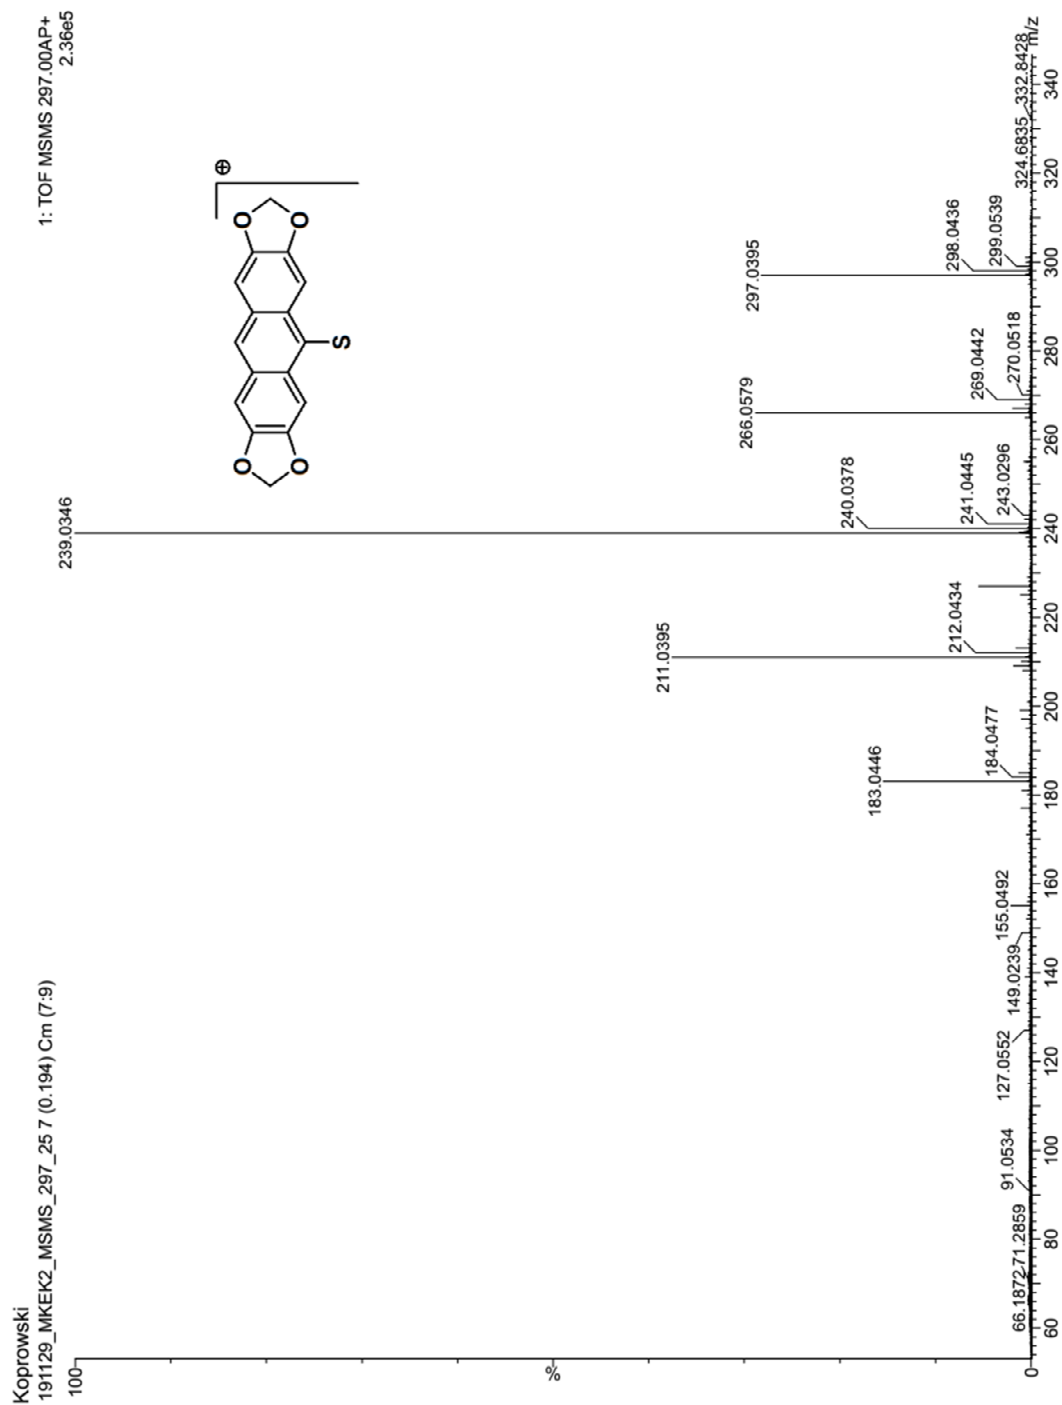

The HR(MS\_MS)-(+)-APCI fragmentation spectrum of the peak at  $m/z = 297$  (35eV) after irradiation of ethanolic solution of **2d** for 9 hours at 254 nm



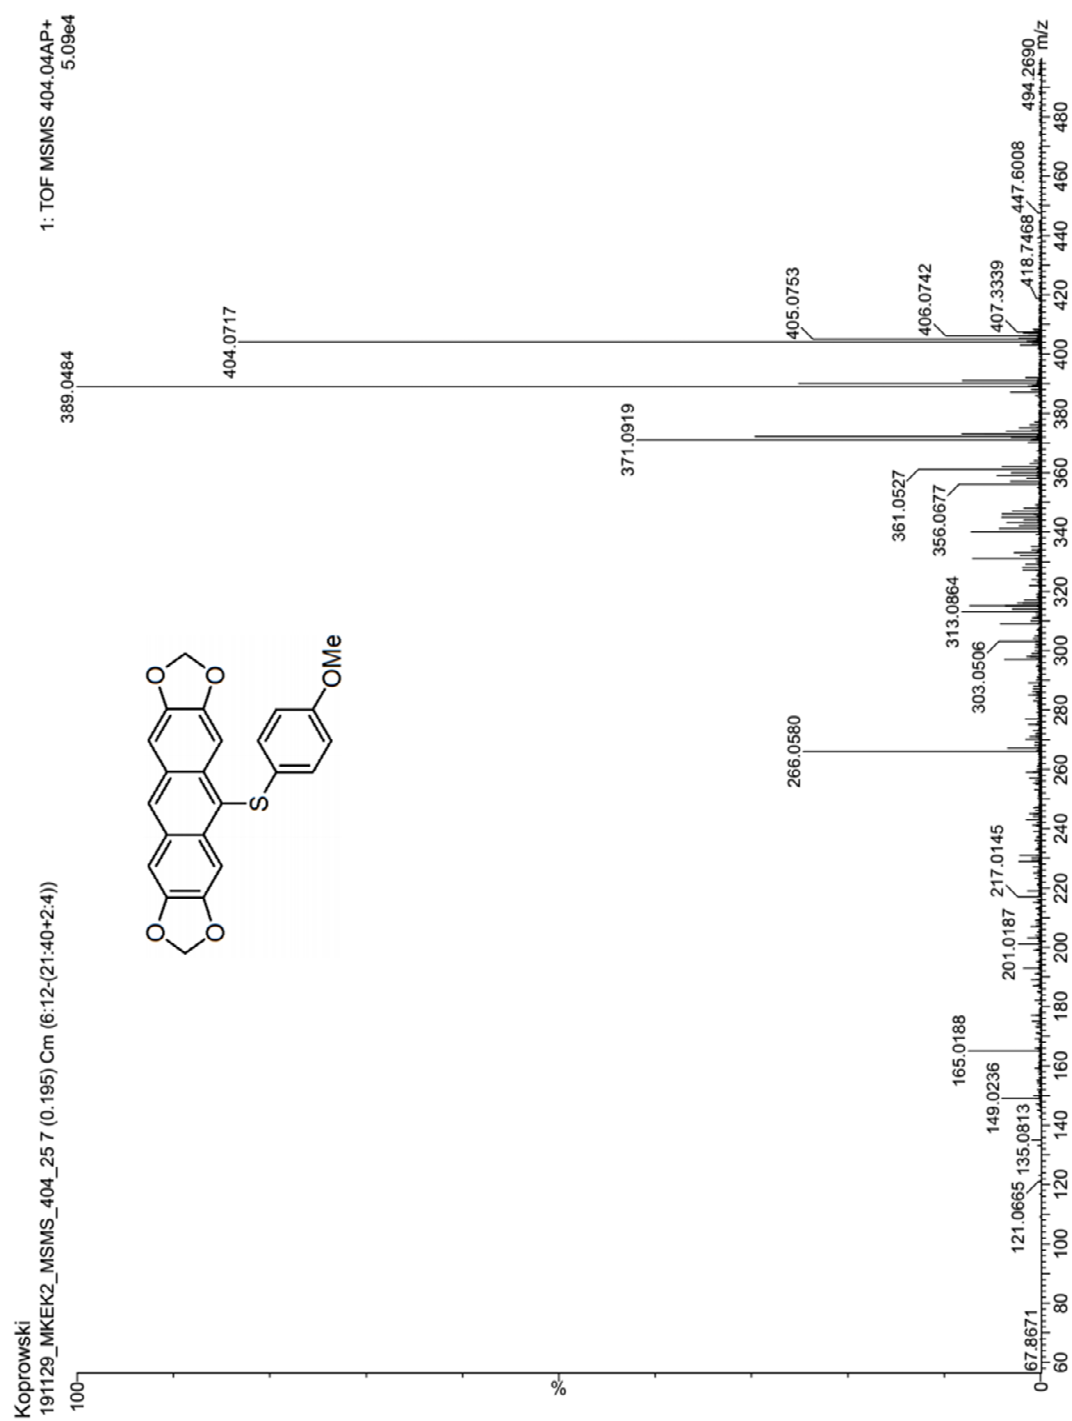

The HR(MS\_MS)-(+)-APCI fragmentation spectrum of the peak at  $m/z = 404$  (35eV) after irradiation of ethanolic solution of **2d** for 9 hours at 254 nm

Koprowski

191129\_MIKE2\_MSMS\_404\_35 7 (0.195) Cm (6:10-(2:3+19:39))

1: TOF MSMS 404.04AP+  
9.72e3

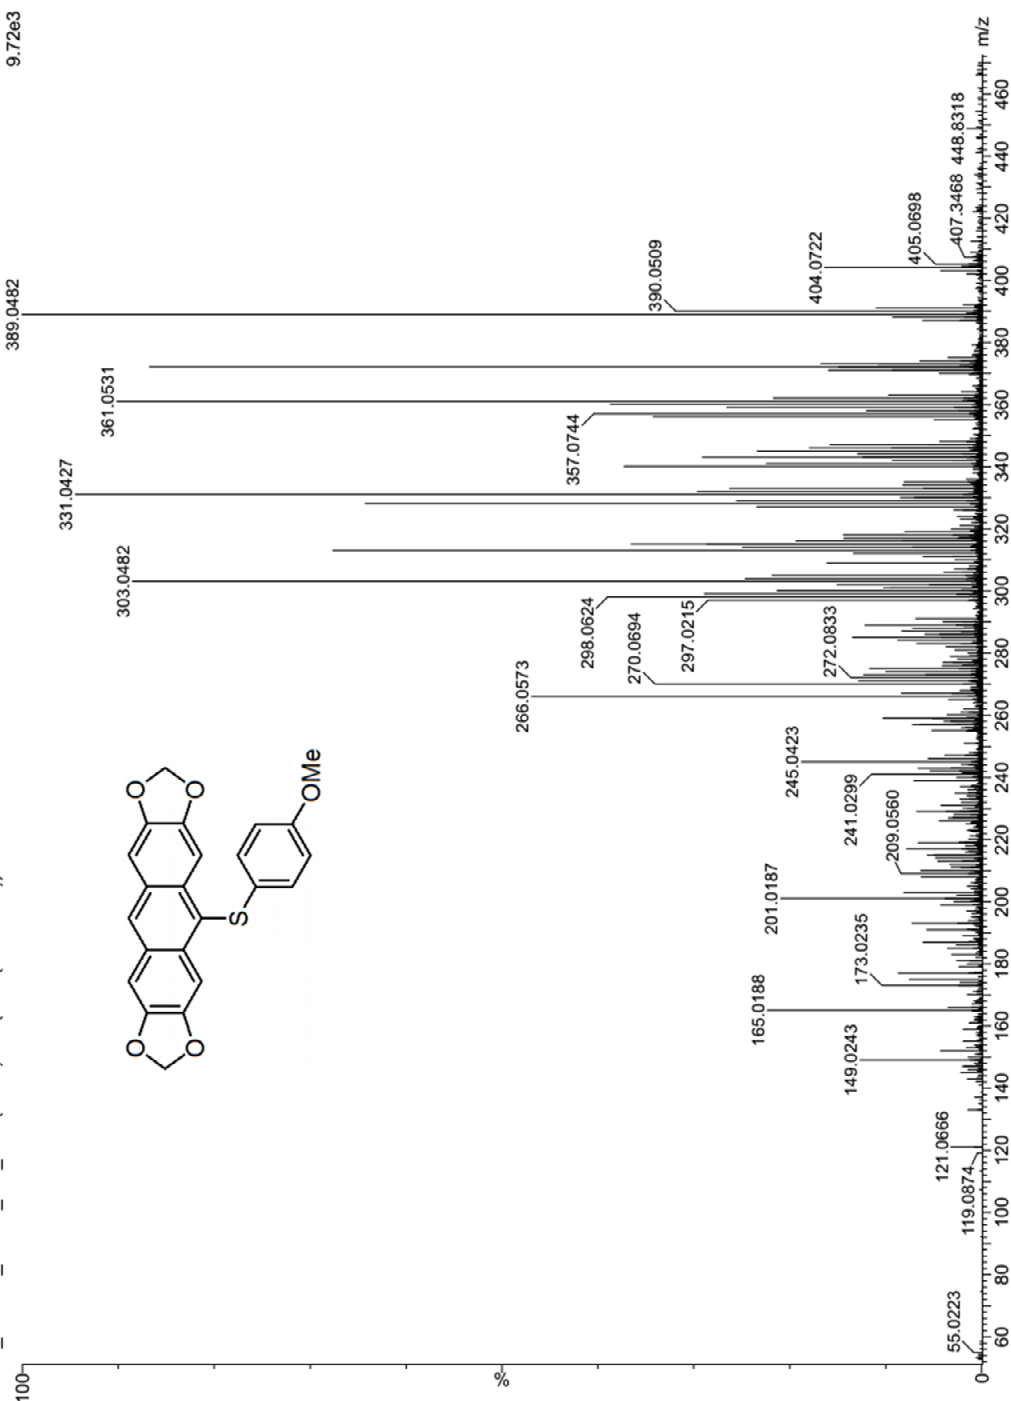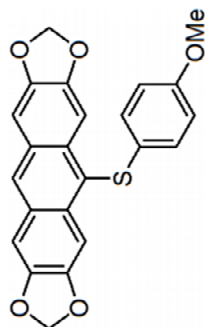

**Figure S14.** HRMS-(+)-APCI spectra of **3c**.

(The left spectrum shows fragmentation of **3c** after irradiation for 3 hours at 254 nm under air O<sub>2</sub> in EtOH and the right spectrum shows fragmentation of the starting acene **3c**)

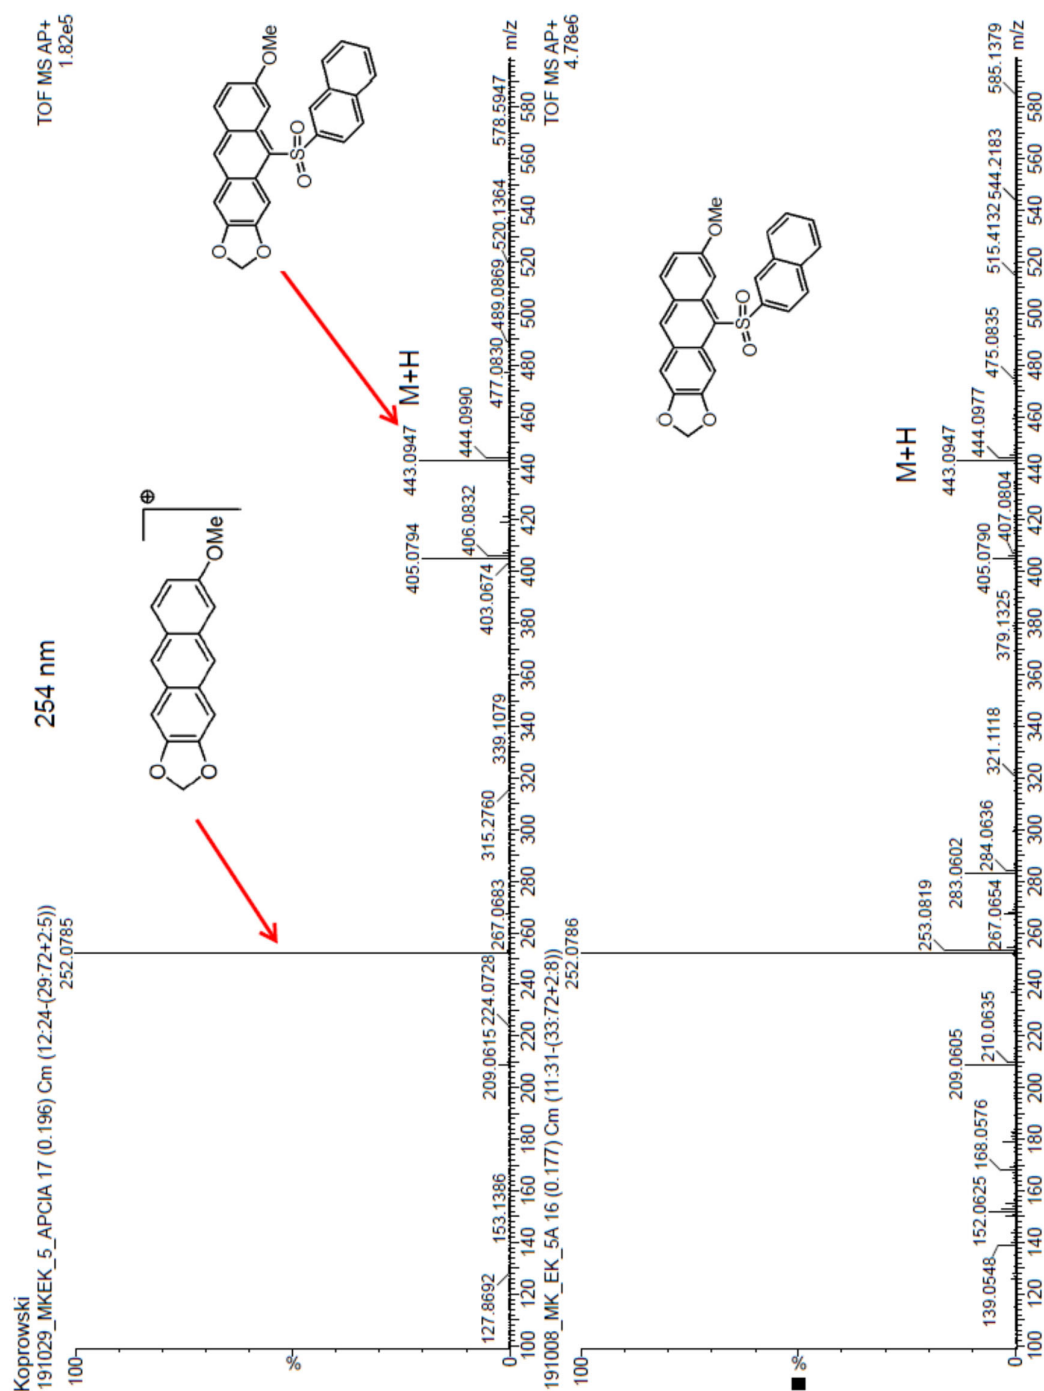

The HRMS-(+)-APCI spectrum of ethanolic solution of **3c** after irradiation for 9 hours at 254 nm

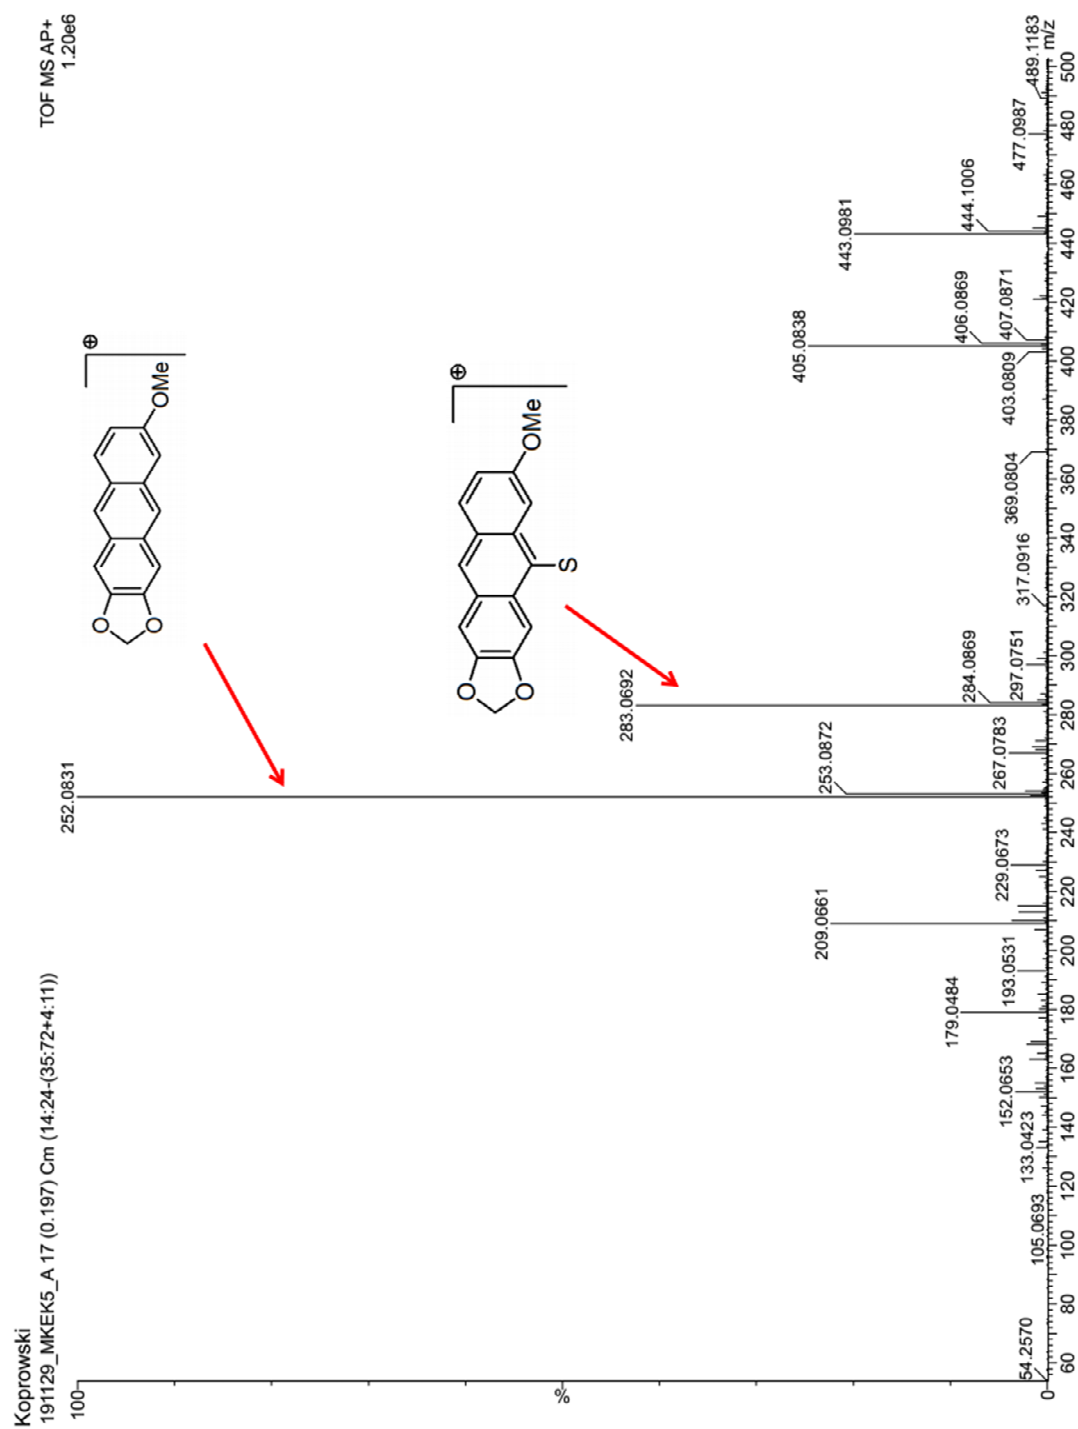

The HR(MS\_MS)-(+)-APCI fragmentation spectrum of the peak at  $m/z = 252$  (15eV) after irradiation of ethanolic solution of **3c** for 9 hours at 254 nm

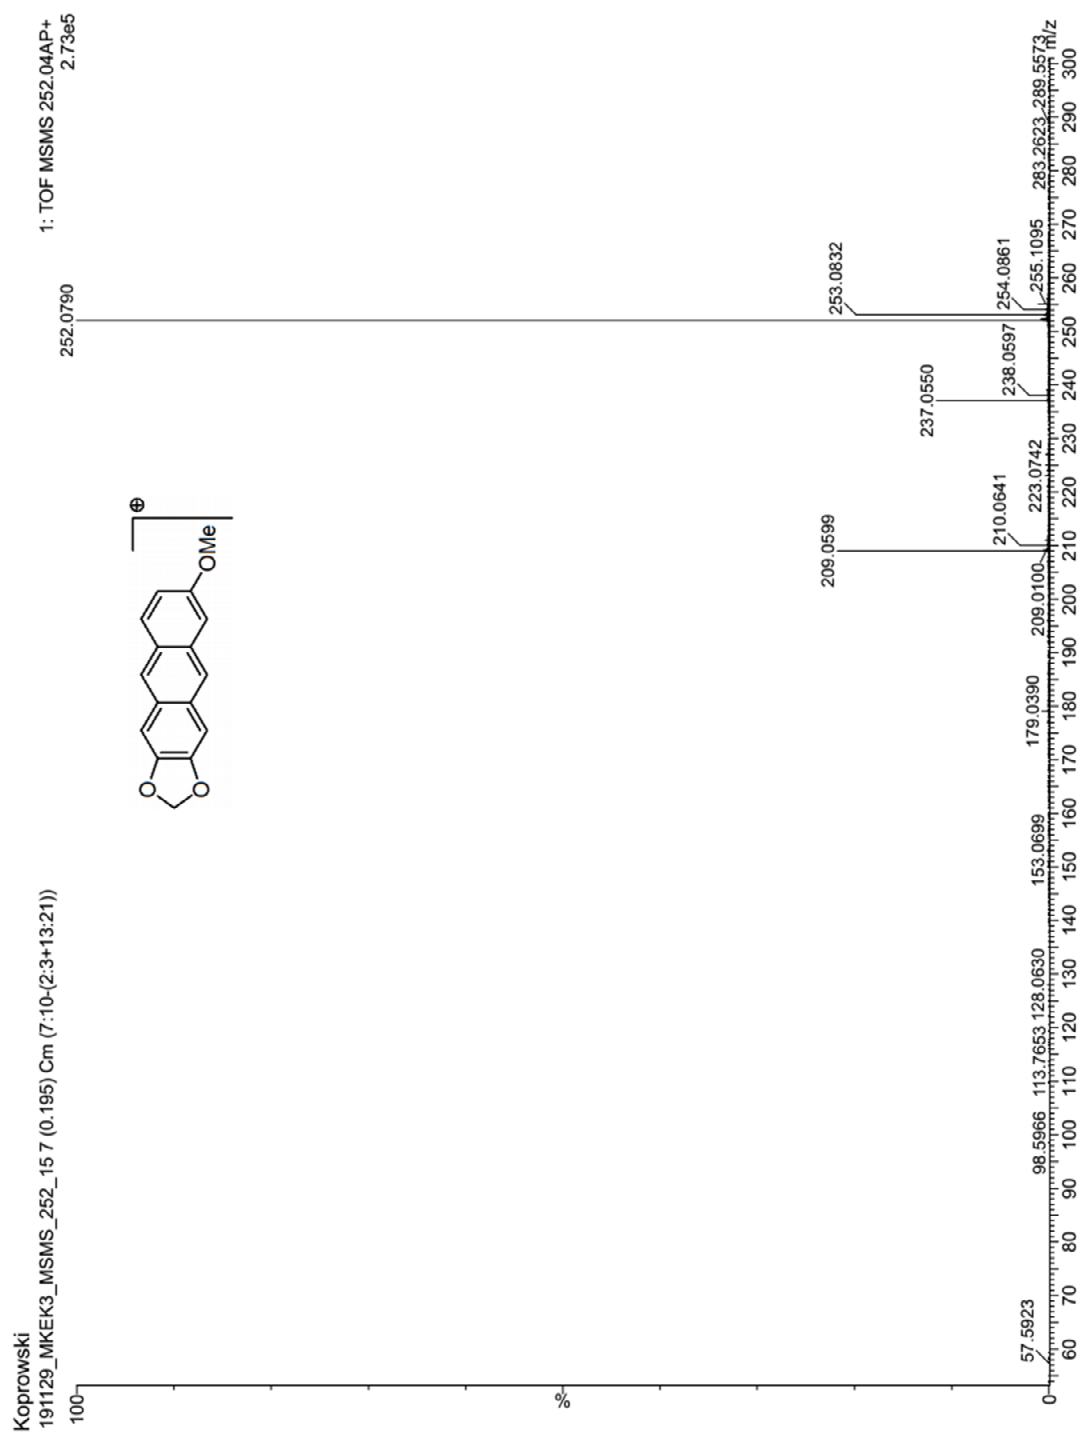

The HR(MS\_MS)-(+)-APCI fragmentation spectrum of the peak at  $m/z = 252$  (25eV) after irradiation of ethanolic solution of **3c** for 9 hours at 254 nm

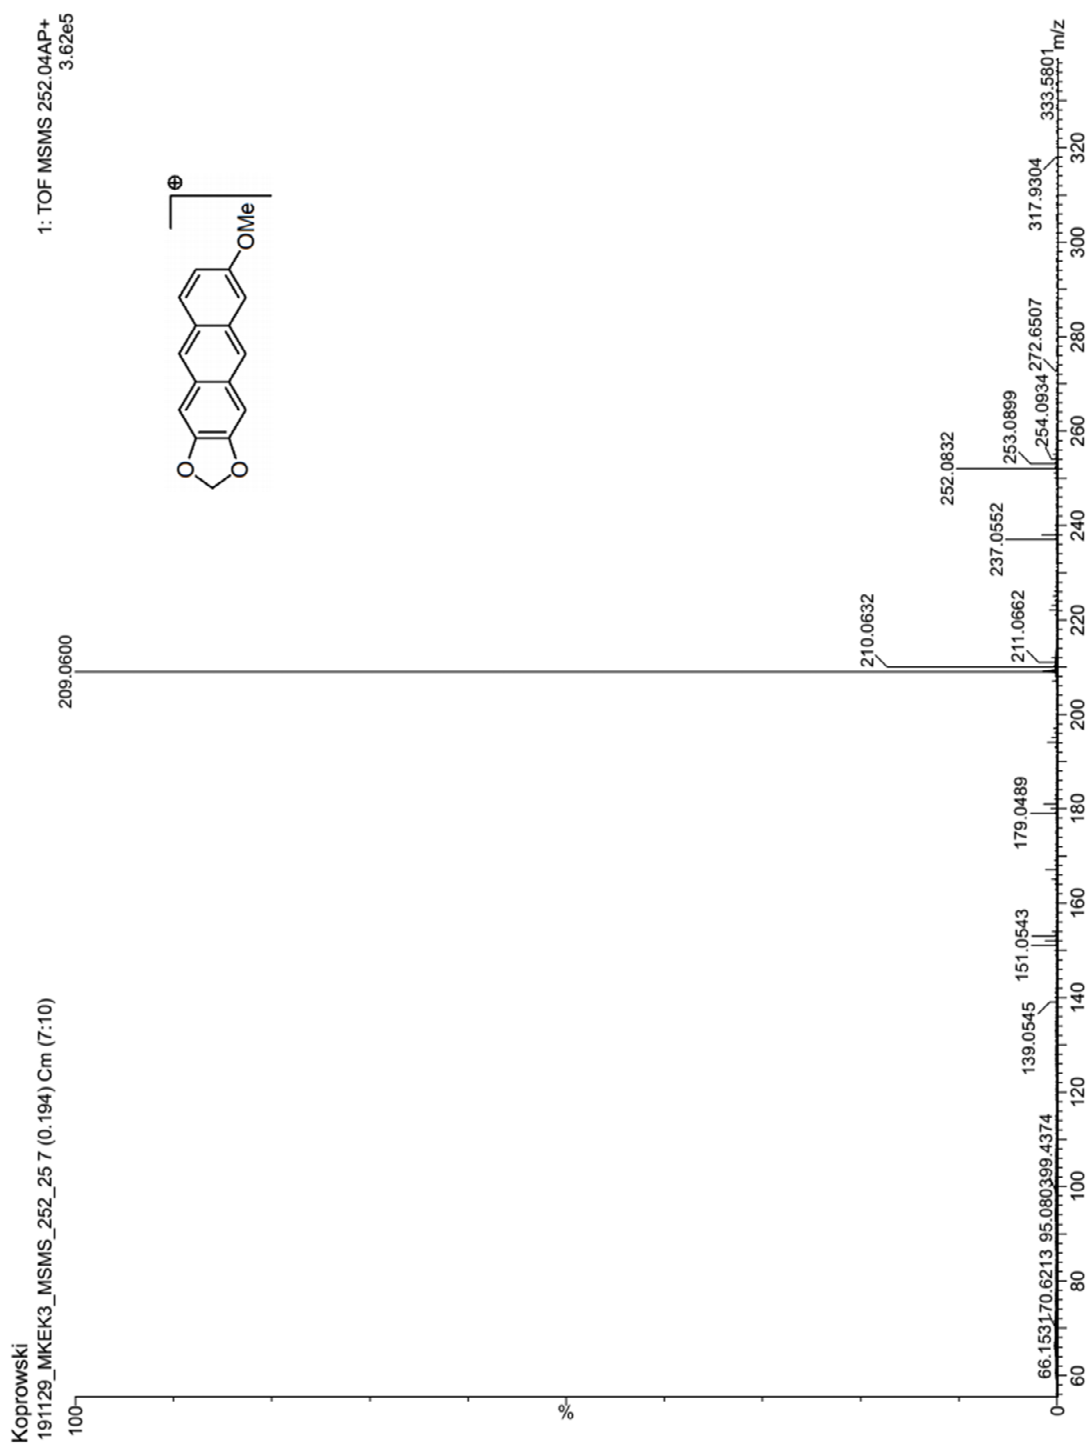

The HR(MS\_MS)-(+)-APCI fragmentation spectrum of the peak at  $m/z = 252$  (35eV) after irradiation of ethanolic solution of **3c** for 9 hours at 254 nm

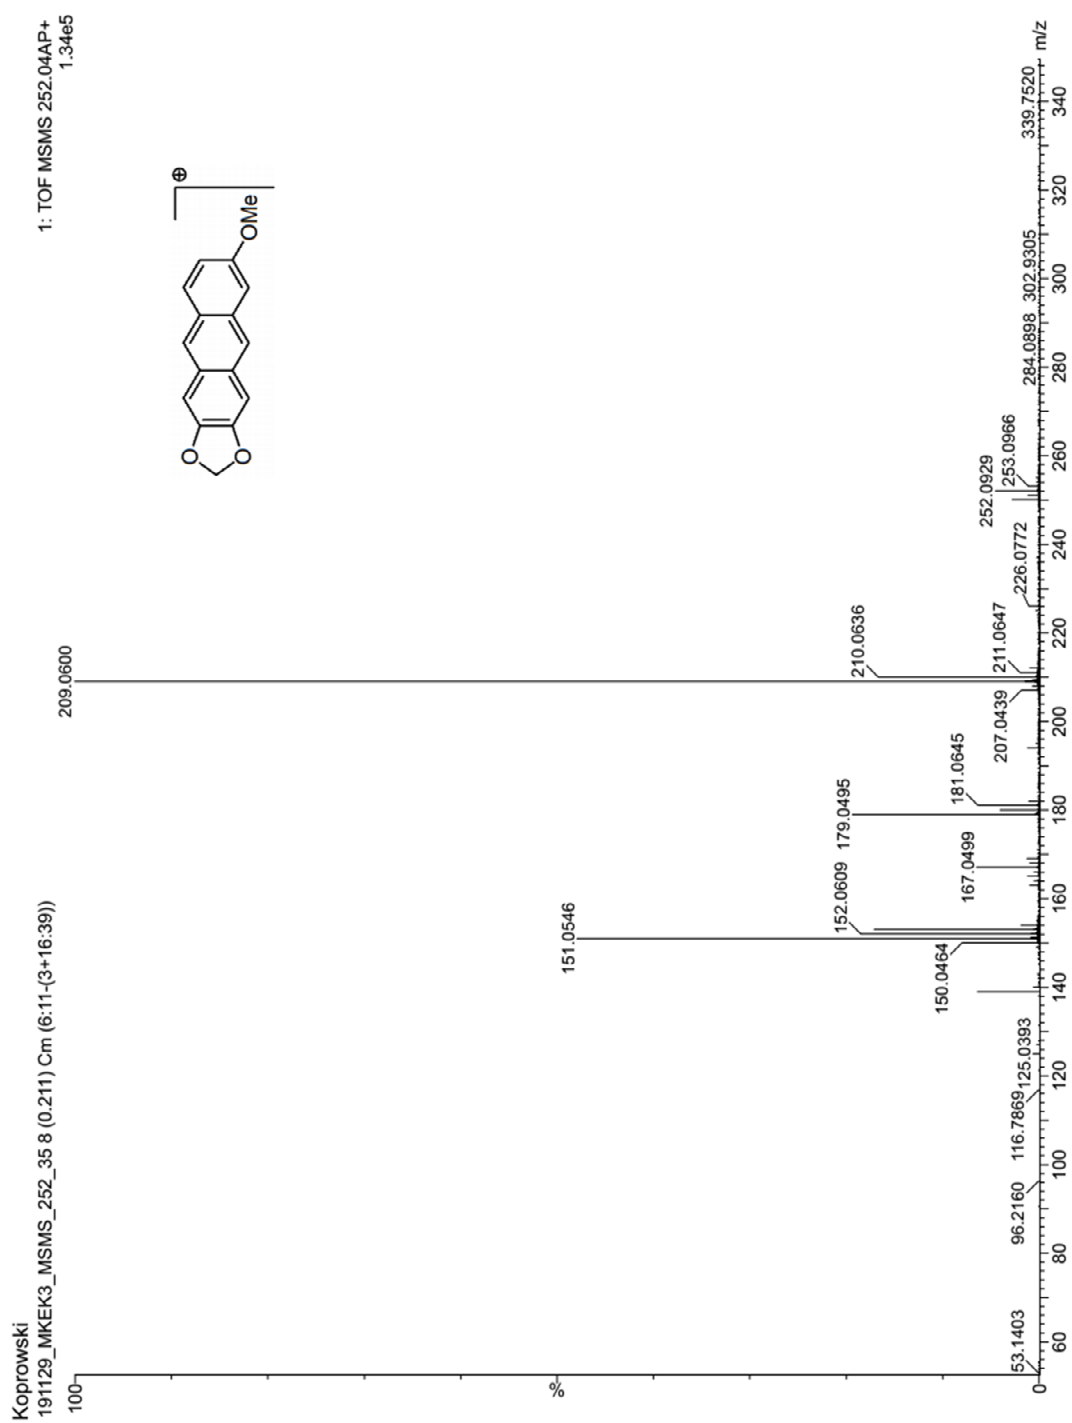

**Figure S15.** HRMS-(+)-APCI spectra of **3d**.

(The left spectrum shows fragmentation of **3d** after irradiation for 3 hours at 254 nm under air O<sub>2</sub> in EtOH and the right spectrum shows fragmentation of the starting acene **3d**)

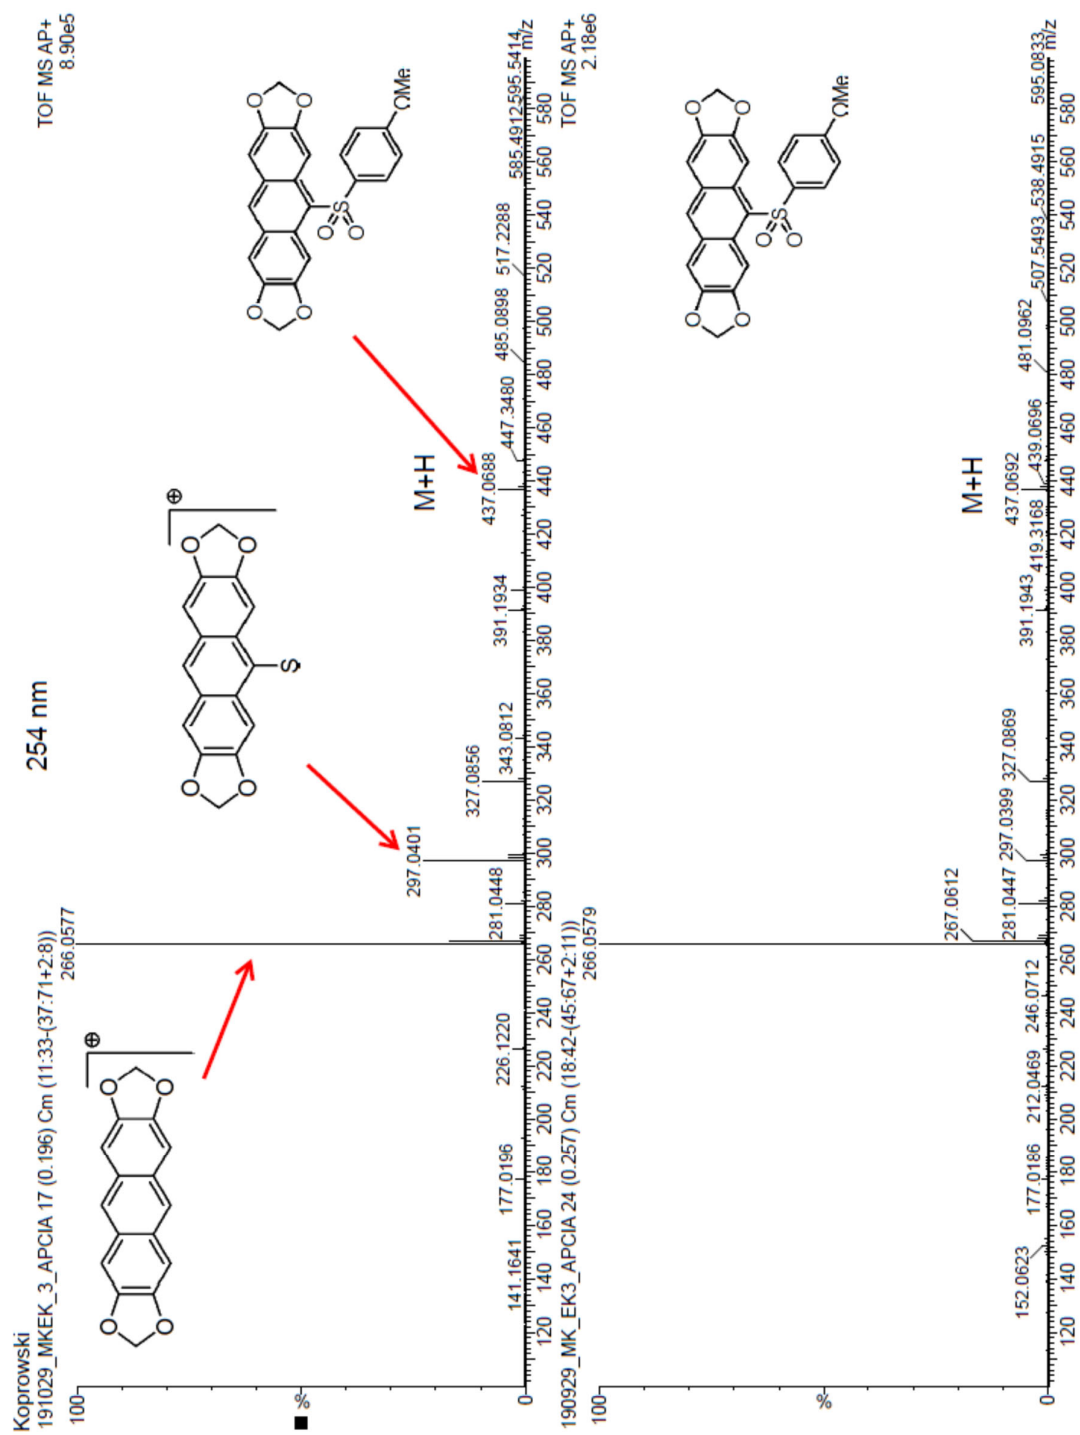

The HRMS-(+)-APCI spectrum of ethanolic solution of **3d** after irradiation for 9 hours at 254 nm

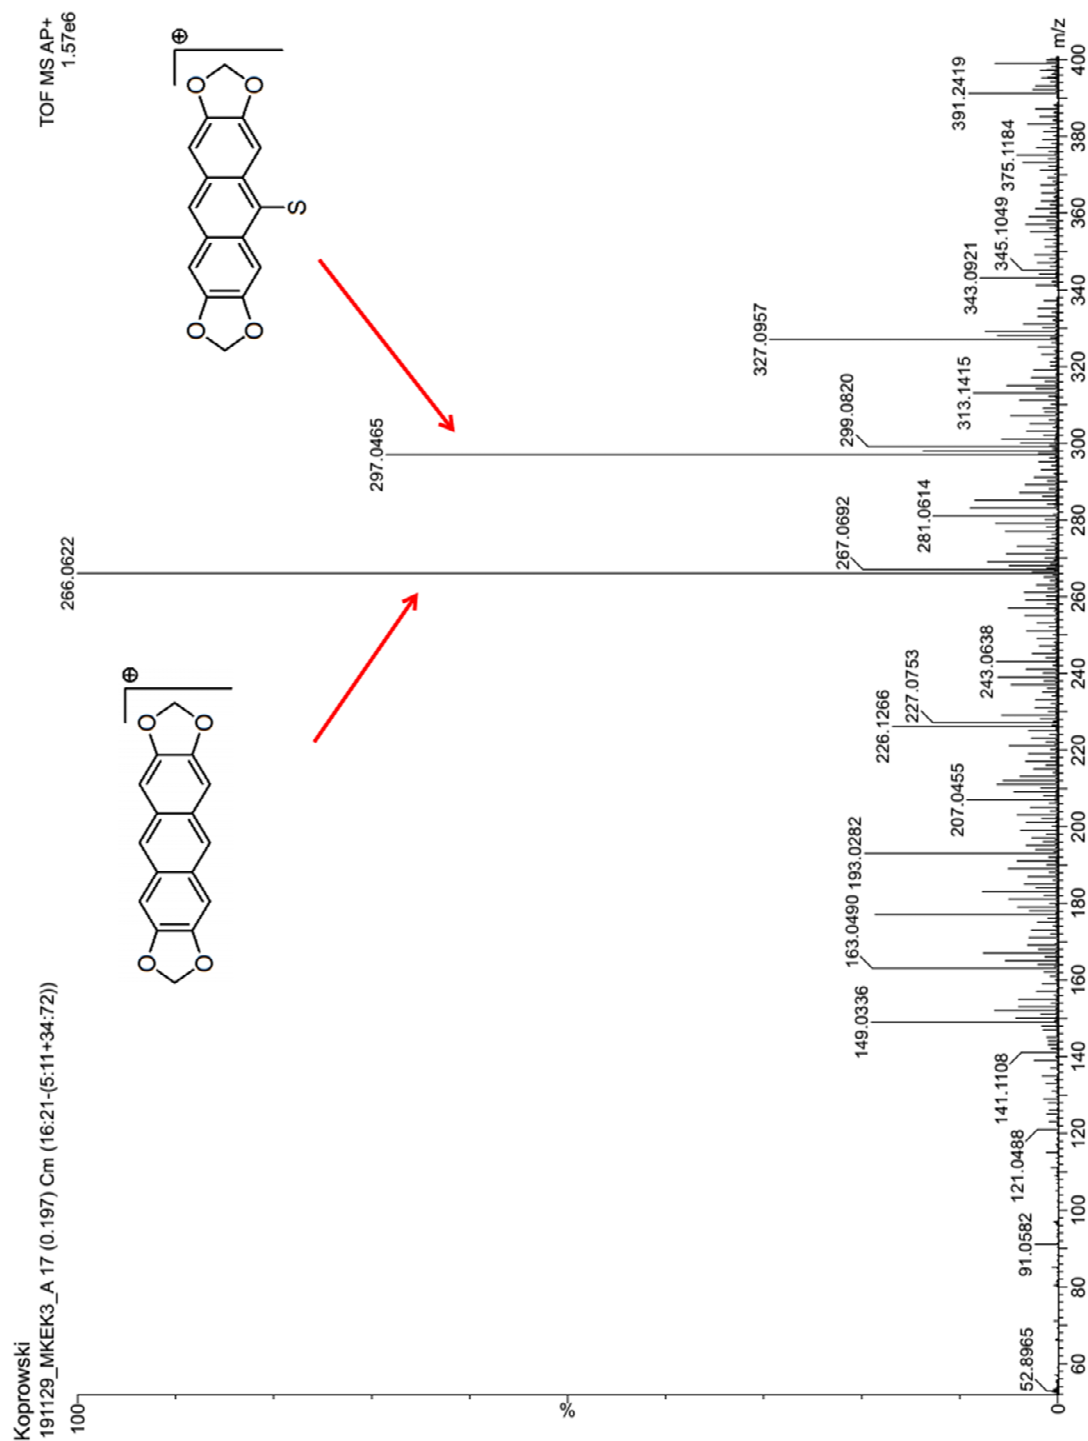

The HR(MS\_MS)-(+)-APCI fragmentation spectrum of the peak at  $m/z = 266$  (25eV) after irradiation of ethanolic solution of **3d** for 9 hours at 254 nm

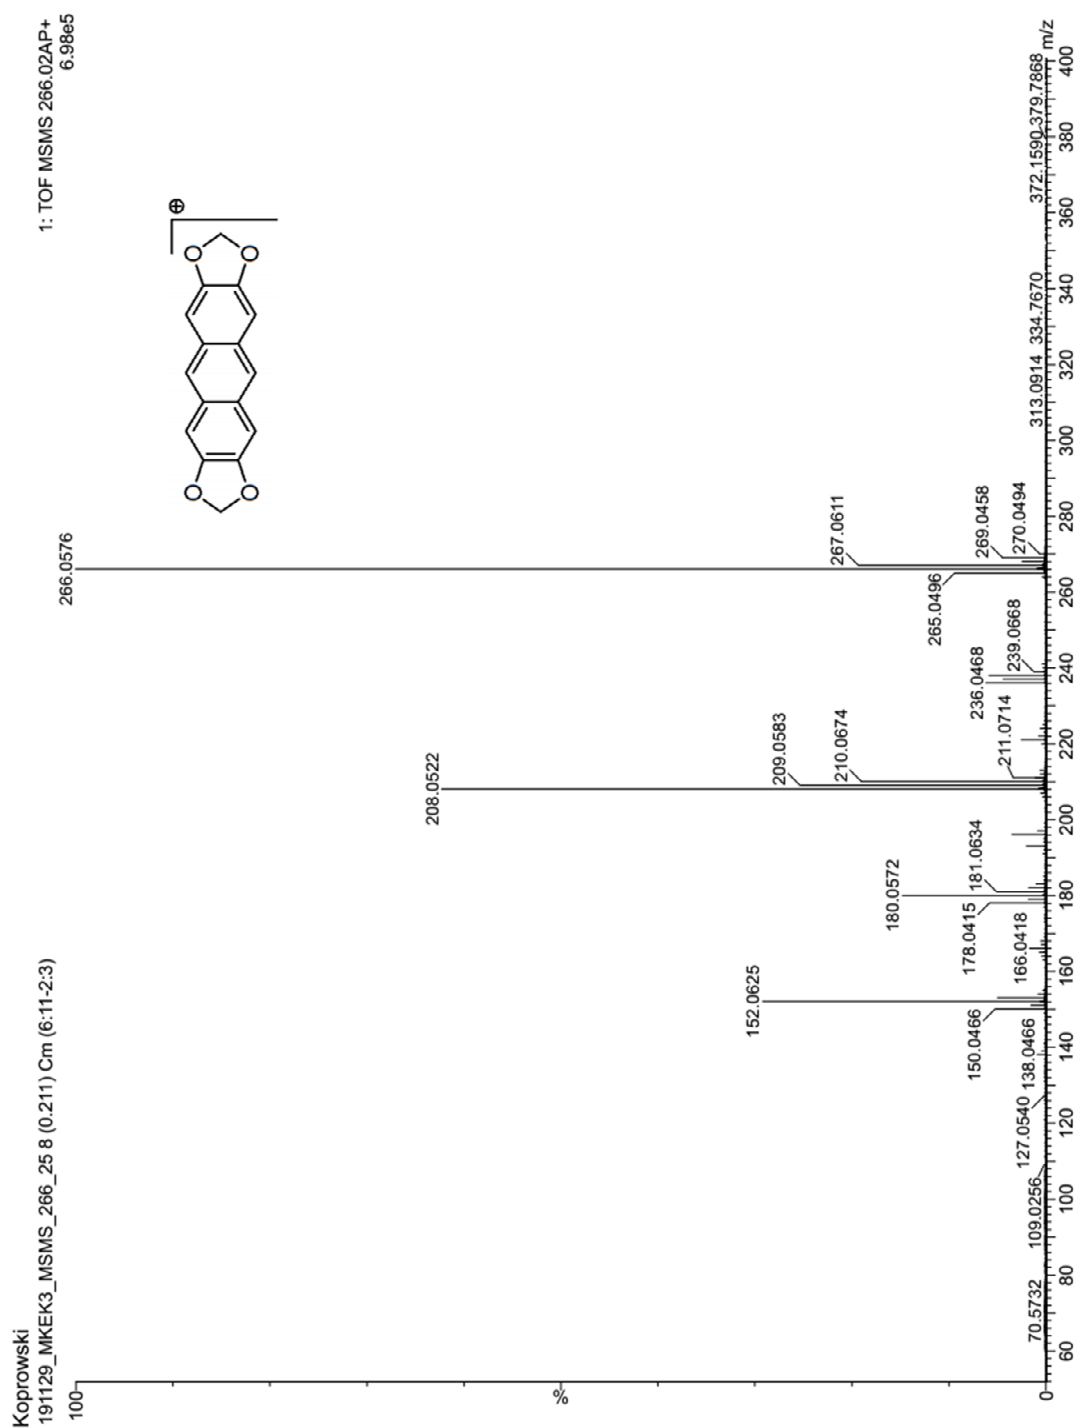

The HR(MS\_MS)-(+)-APCI fragmentation spectrum of the peak at  $m/z = 266$  (35eV) after irradiation of ethanolic solution of **3d** for 9 hours at 254 nm

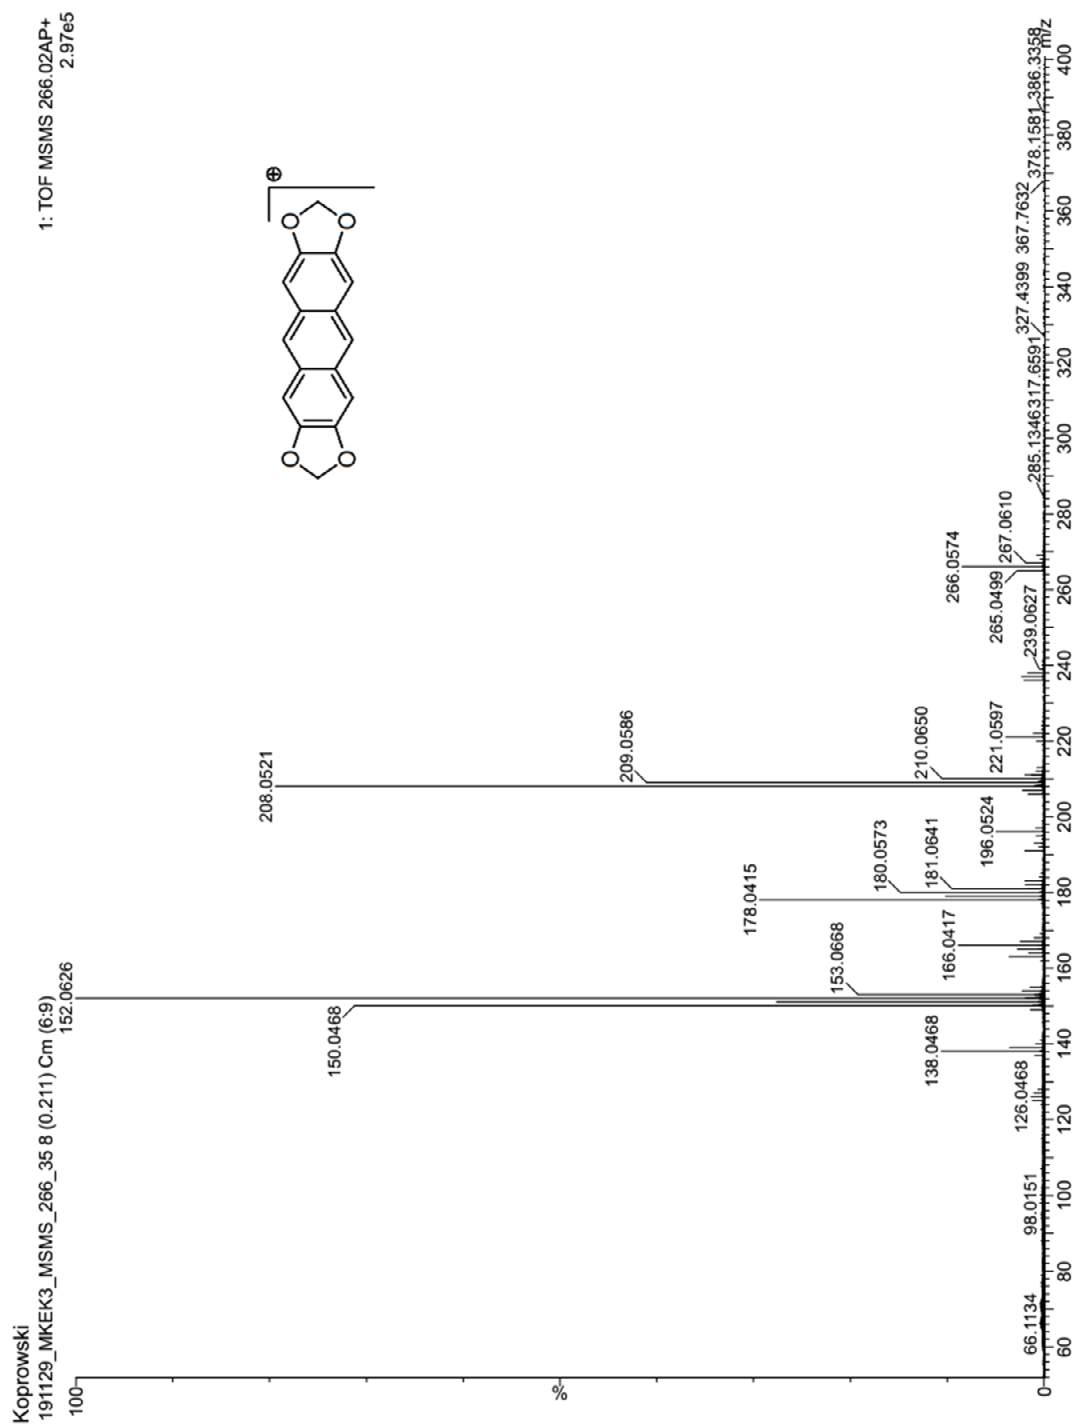

The HR(MS\_MS)-(+)-APCI fragmentation spectrum of the peak at  $m/z = 297$  (25eV) after irradiation of ethanolic solution of **3d** for 9 hours at 254 nm

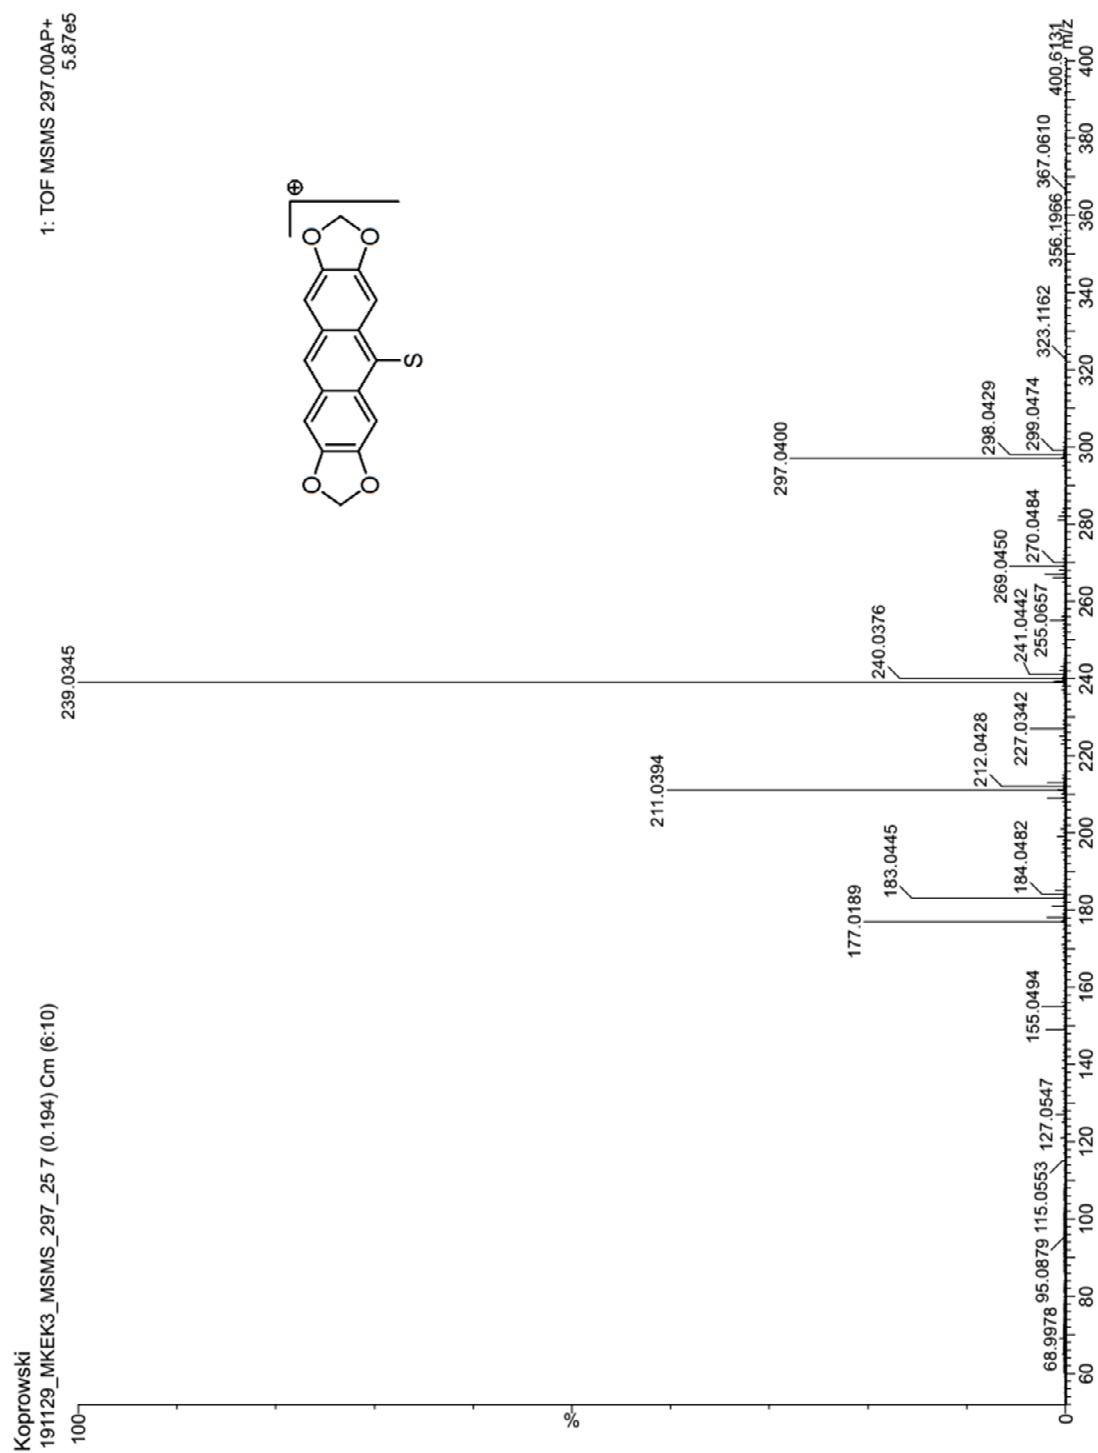

Koprowski  
191129\_MKEK3\_MSMS\_297\_35 7 (0.194) Cm (7:9)

1: TOF MSMS 297.00AP+  
3.32e5

Chemical structure: c1cc2c(c1)oc3cc4c(c2)oc5cc6c(c4)oc7cc8c(c6)oc9ccccc98c73

Mass spectrum data (m/z vs. relative intensity):

| m/z      | Relative Intensity (%) |
|----------|------------------------|
| 77.0393  | ~5                     |
| 115.0547 | ~10                    |
| 125.0390 | ~15                    |
| 127.0549 | ~20                    |
| 153.0339 | ~15                    |
| 155.0497 | ~20                    |
| 177.0188 | ~25                    |
| 184.0479 | ~20                    |
| 183.0446 | 100                    |
| 199.0395 | ~10                    |
| 209.0236 | ~15                    |
| 212.0428 | ~25                    |
| 213.0495 | ~10                    |
| 211.0394 | ~85                    |
| 239.0343 | ~65                    |
| 241.0457 | ~10                    |
| 240.0381 | ~15                    |
| 267.0297 | ~5                     |
| 297.0397 | ~5                     |
| 318.6566 | ~5                     |
| 347.5538 | ~5                     |
| 362.2846 | ~5                     |
| 374.1122 | ~5                     |

**Cartesian coordinates and total energies for the geometries of 1a, 1b, 1c, 1d,  
2a, 2b, 2c, 2d, 3a, 3b, 3c and 3d optimized using Gaussian 09**

**Table S1.** Atom coordinates (Å), total energy (Hartree) and the number of imaginary vibrational frequencies for the geometry of **1a** optimized at the B3LYP/6-311++(d,p) level in the gas phase using Gaussian 09.

| Atom | X         | Y         | Z         |
|------|-----------|-----------|-----------|
| O    | 4.950273  | -2.929777 | 0.359849  |
| O    | 5.339227  | -0.830094 | -0.511165 |
| O    | -4.35161  | 0.882437  | -0.779757 |
| O    | -4.700165 | -1.577657 | 0.250672  |
| O    | -2.504677 | -3.172552 | 0.845163  |
| C    | 5.956015  | -1.930571 | 0.163999  |
| H    | 6.330879  | -1.595390 | 1.138111  |
| H    | 6.753032  | -2.336269 | -0.458107 |
| C    | 3.749845  | -2.292425 | 0.177310  |
| C    | 2.496487  | -2.749743 | 0.406222  |
| H    | 2.311241  | -3.736081 | 0.812216  |
| C    | 1.396954  | -1.880345 | 0.087874  |
| C    | 0.086205  | -2.297989 | 0.315439  |
| H    | -0.094990 | -3.278175 | 0.738436  |
| C    | -1.009386 | -1.483571 | 0.027776  |
| C    | -2.349710 | -1.931700 | 0.283119  |
| C    | -3.428061 | -1.120715 | 0.027716  |
| C    | -3.212014 | 0.181697  | -0.539458 |
| C    | -1.944266 | 0.637267  | -0.798150 |
| H    | -1.785047 | 1.614639  | -1.225856 |
| C    | -0.803354 | -0.169394 | -0.519026 |
| C    | 0.526066  | 0.264426  | -0.751435 |
| C    | 1.636795  | -0.561688 | -0.463020 |
| C    | 2.992779  | -0.139824 | -0.681309 |
| H    | 3.203138  | 0.835584  | -1.094728 |
| C    | 3.988175  | -1.002473 | -0.359082 |
| C    | -4.236920 | 2.177529  | -1.361481 |
| H    | -3.670636 | 2.854311  | -0.713786 |
| H    | -5.256559 | 2.542714  | -1.471174 |
| H    | -3.757941 | 2.126879  | -2.344334 |
| C    | -5.366834 | -1.016190 | 1.390958  |

|                                             |           |              |           |
|---------------------------------------------|-----------|--------------|-----------|
| H                                           | -4.802391 | -1.227277    | 2.304648  |
| H                                           | -6.339838 | -1.504002    | 1.441180  |
| H                                           | -5.502626 | 0.060925     | 1.271969  |
| C                                           | -3.161368 | -4.159412    | 0.033651  |
| H                                           | -4.186701 | -3.862602    | -0.190809 |
| H                                           | -3.157855 | -5.077874    | 0.620105  |
| H                                           | -2.604746 | -4.318074    | -0.896064 |
| S                                           | 0.802986  | 1.869460     | -1.509632 |
| C                                           | 0.832725  | 3.016070     | -0.126098 |
| C                                           | 0.914852  | 4.377664     | -0.445384 |
| C                                           | 0.793759  | 2.623082     | 1.213270  |
| C                                           | 0.957578  | 5.331082     | 0.567304  |
| H                                           | 0.945059  | 4.689153     | -1.484244 |
| C                                           | 0.834030  | 3.587067     | 2.220199  |
| H                                           | 0.731457  | 1.573110     | 1.469753  |
| C                                           | 0.916265  | 4.941813     | 1.906376  |
| H                                           | 1.021871  | 6.381973     | 0.307041  |
| H                                           | 0.802605  | 3.270551     | 3.257149  |
| H                                           | 0.948174  | 5.685743     | 2.693870  |
| Total energy                                |           | -1701.218192 |           |
| Number of imaginary vibrational frequencies |           | 0            |           |

**Table S2.** Atom coordinates (Å), total energy (Hartree) and the number of imaginary vibrational frequencies for the geometry of **1b** optimized at the B3LYP/6-311++(d,p) level in the gas phase using Gaussian 09.

|   |           |           |           |
|---|-----------|-----------|-----------|
| O | 3.549354  | 5.093585  | 0.483647  |
| O | 1.560795  | 5.419780  | -0.637928 |
| C | 2.567945  | 6.076201  | 0.137975  |
| H | 2.117329  | 6.478468  | 1.052877  |
| H | 3.033771  | 6.858181  | -0.460659 |
| C | 2.950063  | 3.877694  | 0.273478  |
| C | 3.389112  | 2.640084  | 0.602638  |
| H | 4.321834  | 2.483825  | 1.129582  |
| C | 2.574282  | 1.517239  | 0.226860  |
| C | 2.974692  | 0.222394  | 0.555757  |
| H | 3.901775  | 0.075052  | 1.094148  |
| C | 2.214876  | -0.896732 | 0.215007  |
| C | 2.658766  | -2.222550 | 0.564623  |
| C | 1.906693  | -3.327504 | 0.230654  |
| C | 0.666446  | -3.139941 | -0.474440 |
| C | 0.230584  | -1.892401 | -0.837594 |
| H | -0.697374 | -1.768128 | -1.372154 |
| C | 0.982104  | -0.730744 | -0.502771 |
| C | 0.561162  | 0.581879  | -0.833402 |

|                                             |           |              |           |
|---------------------------------------------|-----------|--------------|-----------|
| C                                           | 1.329001  | 1.717060     | -0.485368 |
| C                                           | 0.920325  | 3.058519     | -0.800068 |
| H                                           | -0.003293 | 3.240028     | -1.329634 |
| C                                           | 1.729291  | 4.077454     | -0.417404 |
| O                                           | 3.811457  | -2.261519    | 1.291129  |
| C                                           | 4.770209  | -3.304549    | 1.089418  |
| H                                           | 5.703199  | -2.925582    | 1.507303  |
| H                                           | 4.476423  | -4.220246    | 1.600646  |
| H                                           | 4.907676  | -3.502459    | 0.021806  |
| S                                           | -0.939875 | 0.810692     | -1.795092 |
| C                                           | -2.265840 | 0.630532     | -0.596099 |
| C                                           | -3.539443 | 0.424080     | -1.084247 |
| C                                           | -2.052905 | 0.734081     | 0.802180  |
| C                                           | -3.110944 | 0.625242     | 1.670158  |
| C                                           | -4.434688 | 0.418489     | 1.202431  |
| C                                           | -4.649350 | 0.320318     | -0.208426 |
| C                                           | -5.971842 | 0.112207     | -0.684723 |
| C                                           | -7.026726 | 0.007049     | 0.190158  |
| C                                           | -6.813116 | 0.104031     | 1.585850  |
| C                                           | -5.545113 | 0.305080     | 2.077940  |
| H                                           | -6.137736 | 0.039539     | -1.754700 |
| H                                           | -8.030865 | -0.150173    | -0.187796 |
| H                                           | -7.654164 | 0.019492     | 2.264686  |
| H                                           | -5.377001 | 0.380048     | 3.147474  |
| H                                           | -2.938602 | 0.701240     | 2.739037  |
| H                                           | -1.051517 | 0.894675     | 1.180720  |
| H                                           | -3.707701 | 0.336574     | -2.153226 |
| O                                           | 2.267145  | -4.569934    | 0.686655  |
| O                                           | -0.022971 | -4.289622    | -0.708986 |
| C                                           | 2.581755  | -5.568134    | -0.294821 |
| H                                           | 1.715399  | -5.801620    | -0.913319 |
| H                                           | 3.412188  | -5.236988    | -0.928521 |
| H                                           | 2.883961  | -6.452192    | 0.266229  |
| C                                           | -1.307098 | -4.196691    | -1.319382 |
| H                                           | -1.682915 | -5.217131    | -1.371154 |
| H                                           | -1.985054 | -3.584683    | -0.717208 |
| H                                           | -1.237035 | -3.779650    | -2.329101 |
| Total energy                                |           | -1854.894256 |           |
| Number of imaginary vibrational frequencies |           | 0            |           |

**Table S3.** Atom coordinates (Å), total energy (Hartree) and the number of imaginary vibrational frequencies for the geometry of **1c** optimized at the B3LYP/6-311++(d,p) level in the gas phase using Gaussian 09.

|   |           |           |          |
|---|-----------|-----------|----------|
| O | -5.579647 | -2.259367 | 0.473754 |
|---|-----------|-----------|----------|

|   |           |           |           |
|---|-----------|-----------|-----------|
| O | -3.964316 | -3.288999 | -0.811478 |
| C | -5.145077 | -3.523752 | -0.038045 |
| H | -4.905878 | -4.191925 | 0.797235  |
| H | -5.920978 | -3.940374 | -0.679435 |
| C | -4.513169 | -1.410318 | 0.331353  |
| C | -4.356067 | -0.150426 | 0.800411  |
| H | -5.114011 | 0.335279  | 1.401877  |
| C | -3.139871 | 0.541199  | 0.470546  |
| C | -2.917446 | 1.834822  | 0.938760  |
| H | -3.677703 | 2.308757  | 1.552273  |
| C | -1.750845 | 2.542980  | 0.646134  |
| C | -1.543011 | 3.868543  | 1.138319  |
| C | -0.407844 | 4.562589  | 0.849148  |
| C | 0.599033  | 3.965332  | 0.034743  |
| C | 0.442824  | 2.693594  | -0.460603 |
| H | 1.198536  | 2.240953  | -1.083730 |
| C | -0.732650 | 1.937312  | -0.171154 |
| C | -0.941321 | 0.617009  | -0.643732 |
| C | -2.124100 | -0.098412 | -0.343387 |
| C | -2.356048 | -1.439546 | -0.805197 |
| H | -1.620280 | -1.943542 | -1.414390 |
| C | -3.520879 | -2.041590 | -0.459564 |
| S | 0.280387  | -0.136334 | -1.725972 |
| C | 1.549821  | -0.745113 | -0.609398 |
| C | 2.750953  | -1.130376 | -1.168138 |
| C | 1.345509  | -0.877941 | 0.787326  |
| C | 2.340561  | -1.388187 | 1.584060  |
| C | 3.585447  | -1.800068 | 1.042225  |
| C | 3.789489  | -1.668373 | -0.367508 |
| C | 5.034012  | -2.077575 | -0.918063 |
| C | 6.023656  | -2.591965 | -0.114945 |
| C | 5.820453  | -2.722290 | 1.279708  |
| C | 4.627861  | -2.334018 | 1.842794  |
| H | 5.191229  | -1.979860 | -1.987314 |
| H | 6.967588  | -2.902086 | -0.549306 |
| H | 6.609628  | -3.130077 | 1.901157  |
| H | 4.467860  | -2.432132 | 2.911686  |
| H | 2.176386  | -1.484319 | 2.652602  |
| H | 0.402469  | -0.572604 | 1.222108  |
| H | 2.916144  | -1.025948 | -2.236058 |
| O | 1.680696  | 4.760495  | -0.188043 |
| C | 2.741761  | 4.252325  | -0.989655 |
| H | 3.487543  | 5.044238  | -1.030609 |
| H | 3.182649  | 3.356062  | -0.541665 |
| H | 2.396410  | 4.021587  | -2.002733 |
| H | -2.314955 | 4.318306  | 1.753759  |
| H | -0.241003 | 5.567470  | 1.217390  |

|                                             |              |
|---------------------------------------------|--------------|
| Total energy                                | -1625.796378 |
| Number of imaginary vibrational frequencies | 0            |

**Table S4.** Cartesian coordinates (Å), total energy (Hartree) and the number of imaginary vibrational frequencies for the geometry of **1d** optimized at the B3LYP/6-311++(d,p) level in the gas phase using Gaussian 09.

| Atom | X         | Y         | Z         |
|------|-----------|-----------|-----------|
| O    | 5.805040  | -0.645214 | -0.736548 |
| O    | 4.752023  | -2.206873 | 0.594489  |
| O    | -3.340698 | 3.4337340 | 0.591547  |
| O    | -2.256826 | 4.936991  | -0.781623 |
| C    | 5.874540  | -1.995981 | -0.266062 |
| H    | 5.813538  | -2.681210 | -1.119606 |
| H    | 6.795633  | -2.134970 | 0.298825  |
| C    | 4.521956  | -0.230195 | -0.491500 |
| C    | 3.900861  | 0.904290  | -0.892731 |
| H    | 4.396452  | 1.638153  | -1.515617 |
| C    | 2.546735  | 1.115745  | -0.460710 |
| C    | 1.852941  | 2.258682  | -0.857261 |
| H    | 2.356506  | 2.980575  | -1.492710 |
| C    | 0.536511  | 2.510713  | -0.468496 |
| C    | -0.130380 | 3.706345  | -0.903843 |
| C    | -1.402738 | 3.906789  | -0.485114 |
| C    | -2.067449 | 2.981814  | 0.356444  |
| C    | -1.489165 | 1.836927  | 0.796772  |
| H    | -2.018948 | 1.149838  | 1.439379  |
| C    | -0.141595 | 1.560465  | 0.385840  |
| C    | 0.548749  | 0.390523  | 0.783191  |
| C    | 1.882582  | 0.141983  | 0.381088  |
| C    | 2.599901  | -1.042151 | 0.766926  |
| H    | 2.129578  | -1.784703 | 1.394583  |
| C    | 3.873721  | -1.188296 | 0.326363  |
| S    | -0.253857 | -0.775823 | 1.893756  |
| C    | -1.348079 | -1.709455 | 0.811988  |
| C    | -2.418453 | -2.377697 | 1.404389  |
| C    | -1.148241 | -1.838754 | -0.567256 |
| C    | -3.278216 | -3.172596 | 0.643812  |
| C    | -2.007786 | -2.614828 | -1.330729 |
| H    | -0.323261 | -1.327042 | -1.047217 |
| C    | -3.076945 | -3.291613 | -0.732752 |
| H    | -1.862922 | -2.713951 | -2.399979 |
| H    | -2.594924 | -2.280538 | 2.470225  |
| H    | -4.098418 | -3.677083 | 1.136619  |
| H    | 0.378582  | 4.413270  | -1.546777 |

|                                             |           |              |           |
|---------------------------------------------|-----------|--------------|-----------|
| C                                           | -3.384578 | 4.770378     | 0.084878  |
| H                                           | -3.309748 | 5.478755     | 0.918170  |
| H                                           | -4.302226 | 4.912234     | -0.484977 |
| O                                           | -3.861604 | -4.031682    | -1.572426 |
| C                                           | -4.964576 | -4.736187    | -1.021359 |
| H                                           | -5.685038 | -4.053034    | -0.557820 |
| H                                           | -5.439864 | -5.247140    | -1.857223 |
| H                                           | -4.638484 | -5.477036    | -0.282750 |
| Total energy                                |           | -1660.699187 |           |
| Number of imaginary vibrational frequencies |           | 0            |           |

**Table S5.** Atom coordinates (Å), total energy (Hartree) and the number of imaginary vibrational frequencies for the geometry of **2a** optimized at the B3LYP/6-311++(d,p) level in the gas phase using Gaussian 09.

|   |           |           |           |
|---|-----------|-----------|-----------|
| O | 4.138971  | -3.661782 | 0.288922  |
| O | 4.857729  | -1.668911 | -0.623094 |
| O | -5.149018 | -0.726687 | 0.324218  |
| C | 5.298863  | -2.862534 | 0.029124  |
| H | 5.780771  | -2.602582 | 0.978605  |
| H | 5.973258  | -3.407994 | -0.630284 |
| C | 3.065039  | -2.824904 | 0.139157  |
| C | 1.757415  | -3.062082 | 0.399070  |
| H | 1.414803  | -4.004213 | 0.807644  |
| C | 0.818733  | -2.015788 | 0.104580  |
| C | -0.540790 | -2.205404 | 0.354865  |
| H | -0.877631 | -3.142979 | 0.779040  |
| C | -1.490473 | -1.221665 | 0.082419  |
| C | -2.884500 | -1.450529 | 0.344687  |
| C | -3.821553 | -0.478199 | 0.097265  |
| C | -3.403543 | 0.772761  | -0.472592 |
| C | -2.079953 | 1.027258  | -0.728574 |
| H | -1.789810 | 1.971292  | -1.161098 |
| C | -1.074670 | 0.047289  | -0.455572 |
| C | 0.307950  | 0.248804  | -0.680086 |
| C | 1.270745  | -0.754942 | -0.445448 |
| C | 2.668833  | -0.574902 | -0.720540 |
| H | 3.029253  | 0.319789  | -1.205128 |
| C | 3.505832  | -1.598375 | -0.416461 |
| C | -5.714434 | -0.064064 | 1.465073  |
| H | -5.190460 | -0.363640 | 2.378154  |
| H | -6.753505 | -0.387552 | 1.516789  |
| H | -5.674026 | 1.020796  | 1.345380  |
| C | 1.652318  | 2.543138  | 0.155645  |
| C | 2.881521  | 3.160444  | -0.048364 |

|                                             |           |              |           |
|---------------------------------------------|-----------|--------------|-----------|
| C                                           | 1.046917  | 2.534493     | 1.411857  |
| C                                           | 3.528815  | 3.760283     | 1.032598  |
| C                                           | 1.700316  | 3.138648     | 2.483121  |
| H                                           | 0.088737  | 2.049636     | 1.560590  |
| C                                           | 2.940811  | 3.750953     | 2.295443  |
| H                                           | 1.242475  | 3.127067     | 3.465901  |
| H                                           | 3.445296  | 4.219161     | 3.133045  |
| O                                           | 1.833919  | 1.777187     | -2.416010 |
| S                                           | 0.782351  | 1.896401     | -1.325882 |
| O                                           | -3.231034 | -2.652588    | 0.902396  |
| O                                           | -4.420272 | 1.639138     | -0.720822 |
| C                                           | -4.047123 | -3.517625    | 0.094859  |
| H                                           | -4.197659 | -4.420941    | 0.685231  |
| H                                           | -5.007599 | -3.052193    | -0.129195 |
| H                                           | -3.526040 | -3.770951    | -0.834285 |
| C                                           | -4.113742 | 2.886522     | -1.336378 |
| H                                           | -5.067699 | 3.395352     | -1.462174 |
| H                                           | -3.456363 | 3.491399     | -0.703318 |
| H                                           | -3.645522 | 2.738548     | -2.314372 |
| H                                           | 3.319552  | 3.154232     | -1.039753 |
| H                                           | 4.492242  | 4.235021     | 0.883960  |
| Total energy                                |           | -1776.410044 |           |
| Number of imaginary vibrational frequencies |           | 0            |           |

**Table S6.** Atom coordinates (Å), total energy (Hartree) and the number of imaginary vibrational frequencies for the geometry of **2b** optimized at the B3LYP/6-311++(d,p) level in the gas phase using Gaussian 09.

|   |           |           |           |
|---|-----------|-----------|-----------|
| O | 1.934074  | 5.132201  | -0.498589 |
| O | 3.177942  | 3.696176  | 0.809865  |
| O | -5.647505 | -0.981351 | -0.649786 |
| C | 3.253762  | 4.865998  | -0.009274 |
| H | 3.923562  | 4.675887  | -0.855686 |
| H | 3.592484  | 5.708637  | 0.592786  |
| C | 1.213883  | 3.987784  | -0.280506 |
| C | -0.046520 | 3.686509  | -0.673488 |
| H | -0.641219 | 4.368687  | -1.267531 |
| C | -0.587658 | 2.420533  | -0.264931 |
| C | -1.881996 | 2.059012  | -0.640010 |
| H | -2.468580 | 2.736803  | -1.247392 |
| C | -2.453367 | 0.844921  | -0.261399 |
| C | -3.793882 | 0.507746  | -0.653594 |
| C | -4.356088 | -0.692817 | -0.297351 |
| C | -3.603210 | -1.608656 | 0.514380  |
| C | -2.317172 | -1.323375 | 0.897248  |

|                                             |           |              |           |
|---------------------------------------------|-----------|--------------|-----------|
| H                                           | -1.773098 | -2.024026    | 1.509866  |
| C                                           | -1.691507 | -0.093536    | 0.520630  |
| C                                           | -0.366938 | 0.260425     | 0.871232  |
| C                                           | 0.202419  | 1.505664     | 0.532116  |
| C                                           | 1.523223  | 1.895798     | 0.938502  |
| H                                           | 2.105422  | 1.274870     | 1.602150  |
| C                                           | 1.979028  | 3.102530     | 0.518410  |
| C                                           | -5.800531 | -1.962171    | -1.686487 |
| H                                           | -5.311162 | -1.624701    | -2.605520 |
| H                                           | -6.872627 | -2.055961    | -1.856229 |
| H                                           | -5.393569 | -2.926444    | -1.374268 |
| C                                           | 1.792904  | -1.457169    | 0.524687  |
| C                                           | 1.363275  | -1.876683    | -0.757290 |
| C                                           | 4.092962  | -1.939988    | -0.041509 |
| C                                           | 2.292350  | -2.311324    | -1.668888 |
| H                                           | 0.312748  | -1.838770    | -1.021120 |
| C                                           | 3.675848  | -2.356291    | -1.344931 |
| H                                           | 1.975729  | -2.624400    | -2.658418 |
| O                                           | 1.369318  | -0.362628    | 2.941595  |
| S                                           | 0.575313  | -0.998893    | 1.813501  |
| O                                           | -4.464176 | 1.406743     | -1.440100 |
| O                                           | -4.278125 | -2.739217    | 0.849156  |
| C                                           | -5.624711 | 2.022951     | -0.857042 |
| H                                           | -5.999577 | 2.719367     | -1.606487 |
| H                                           | -6.386932 | 1.279042     | -0.622380 |
| H                                           | -5.346988 | 2.574242     | 0.047369  |
| C                                           | -3.639836 | -3.683970    | 1.702916  |
| H                                           | -4.367139 | -4.478613    | 1.858975  |
| H                                           | -2.739846 | -4.097589    | 1.236279  |
| H                                           | -3.378732 | -3.232193    | 2.664935  |
| C                                           | 4.656311  | -2.800215    | -2.268817 |
| C                                           | 5.986689  | -2.831422    | -1.921943 |
| H                                           | 6.726587  | -3.172857    | -2.637128 |
| C                                           | 6.398634  | -2.420617    | -0.632736 |
| H                                           | 7.450463  | -2.450509    | -0.371622 |
| H                                           | 4.339920  | -3.115608    | -3.257671 |
| C                                           | 3.113490  | -1.496945    | 0.887181  |
| H                                           | 3.403680  | -1.178558    | 1.882820  |
| C                                           | 5.472962  | -1.984963    | 0.285871  |
| H                                           | 5.785704  | -1.668786    | 1.275264  |
| Total energy                                |           | -1930.088365 |           |
| Number of imaginary vibrational frequencies |           | 0            |           |

**Table S7.** Atom coordinates (Å), total energy (Hartree) and the number of imaginary vibrational frequencies for the geometry of **2c**

optimized at the B3LYP/6-311++(d,p) level in the gas phase  
using Gaussian 09.

|   |           |           |           |
|---|-----------|-----------|-----------|
| O | 6,040244  | -1,298135 | -0,646512 |
| O | 4,796726  | -2,502426 | 0,878753  |
| C | 5,951376  | -2,554636 | 0,032960  |
| H | 5,826660  | -3,358410 | -0,701407 |
| H | 6,841062  | -2,699656 | 0,644705  |
| C | 4,816899  | -0,699746 | -0,493816 |
| C | 4,341910  | 0,433344  | -1,060985 |
| H | 4,926927  | 1,008707  | -1,767296 |
| C | 3,024091  | 0,870316  | -0,689142 |
| C | 2,487364  | 2,031195  | -1,242332 |
| H | 3,079453  | 2,589947  | -1,960807 |
| C | 1,219958  | 2,506769  | -0,903064 |
| C | 0,698459  | 3,704978  | -1,480638 |
| C | -0,535751 | 4,171795  | -1,145521 |
| C | -1,325682 | 3,464007  | -0,192537 |
| C | -0,870270 | 2,303275  | 0,385835  |
| H | -1,444832 | 1,801553  | 1,147499  |
| C | 0,411463  | 1,780370  | 0,041088  |
| C | 0,937340  | 0,581882  | 0,577527  |
| C | 2,233199  | 0,114388  | 0,264235  |
| C | 2,804903  | -1,080383 | 0,831911  |
| H | 2,269710  | -1,671583 | 1,559786  |
| C | 4,053114  | -1,440128 | 0,442160  |
| C | -1,286104 | -1,094173 | 0,591006  |
| C | -2,592011 | -1,073662 | 1,006252  |
| C | -0,906552 | -1,710436 | -0,625314 |
| C | -1,869536 | -2,277640 | -1,421668 |
| C | -3,239105 | -2,266863 | -1,041717 |
| C | -3,605744 | -1,653673 | 0,197637  |
| C | -4,971666 | -1,646669 | 0,582939  |
| C | -5,931172 | -2,215536 | -0,220858 |
| C | -5,569207 | -2,818599 | -1,448028 |
| C | -4,253690 | -2,844105 | -1,847601 |
| H | -5,246944 | -1,186158 | 1,525886  |
| H | -6,971543 | -2,204444 | 0,084024  |
| H | -6,335568 | -3,263121 | -2,072902 |
| H | -3,974987 | -3,307583 | -2,788246 |
| H | -1,590400 | -2,740979 | -2,362277 |
| H | 0,132364  | -1,718529 | -0,933017 |
| H | -2,844430 | -0,604641 | 1,951354  |
| O | -2,522991 | 4,045817  | 0,080689  |
| C | -3,375425 | 3,421496  | 1,038167  |
| H | -4,258267 | 4,054846  | 1,104276  |
| H | -3,665166 | 2,418279  | 0,710253  |

|                                             |           |              |           |
|---------------------------------------------|-----------|--------------|-----------|
| H                                           | -2,890654 | 3,358435     | 2,016997  |
| H                                           | 1,310465  | 4,243341     | -2,196508 |
| H                                           | -0,939820 | 5,080865     | -1,574004 |
| S                                           | -0,025340 | -0,446030    | 1,751359  |
| O                                           | -0,777421 | 0,416022     | 2,751940  |
| Total energy                                |           | -1700.989221 |           |
| Number of imaginary vibrational frequencies |           | 0            |           |

**Table S8.** Atom coordinates (Å), total energy (Hartree) and the number of imaginary vibrational frequencies for the geometry of **2d** optimized at the B3LYP/6-311++(d,p) level in the gas phase using Gaussian 09.

|   |           |           |           |
|---|-----------|-----------|-----------|
| O | -5.684540 | -0.431187 | -0.939139 |
| O | -4.985005 | 1.222510  | 0.508859  |
| O | 4.010643  | -2.857000 | 0.531235  |
| O | 3.239885  | -4.474851 | -0.920747 |
| C | -6.024452 | 0.852225  | -0.397960 |
| H | -6.078925 | 1.584294  | -1.212070 |
| H | -6.968130 | 0.777615  | 0.141577  |
| C | -4.359361 | -0.618718 | -0.652694 |
| C | -3.529559 | -1.605780 | -1.065122 |
| H | -3.858963 | -2.388846 | -1.736289 |
| C | -2.177215 | -1.589387 | -0.581066 |
| C | -1.280631 | -2.571954 | -0.997972 |
| H | -1.630532 | -3.340792 | -1.679715 |
| C | 0.048980  | -2.604036 | -0.578874 |
| C | 0.927035  | -3.641785 | -1.042953 |
| C | 2.208155  | -3.629248 | -0.605112 |
| C | 2.680991  | -2.634796 | 0.284095  |
| C | 1.899036  | -1.631519 | 0.754564  |
| H | 2.309171  | -0.901314 | 1.435713  |
| C | 0.524849  | -1.583092 | 0.328062  |
| C | -0.378025 | -0.576305 | 0.742887  |
| C | -1.727687 | -0.549302 | 0.325463  |
| C | -2.665502 | 0.466458  | 0.730522  |
| H | -2.376353 | 1.227316  | 1.440764  |
| C | -3.924756 | 0.397359  | 0.232955  |
| C | 0.997840  | 1.850077  | 0.753226  |
| C | 2.195925  | 2.454584  | 1.118973  |
| C | 0.348089  | 2.249825  | -0.420155 |
| C | 2.765547  | 3.448679  | 0.321886  |
| C | 0.904659  | 3.234667  | -1.216944 |
| H | -0.586093 | 1.788886  | -0.713688 |
| C | 2.116620  | 3.841212  | -0.851698 |
| H | 0.420575  | 3.555494  | -2.131423 |

|                                             |           |              |           |
|---------------------------------------------|-----------|--------------|-----------|
| H                                           | 2.698078  | 2.154185     | 2.032616  |
| H                                           | 3.699528  | 3.901551     | 0.625271  |
| H                                           | 0.562615  | -4.400134    | -1.724355 |
| C                                           | 4.302732  | -4.145324    | -0.020357 |
| H                                           | 4.339056  | -4.886323    | 0.786521  |
| H                                           | 5.241832  | -4.099146    | -0.570394 |
| O                                           | 2.576118  | 4.794898     | -1.704697 |
| C                                           | 3.796821  | 5.459046     | -1.397527 |
| H                                           | 4.634286  | 4.754635     | -1.359743 |
| H                                           | 3.958611  | 6.169492     | -2.206093 |
| H                                           | 3.727360  | 5.999280     | -0.447722 |
| S                                           | 0.317368  | 0.644804     | 1.941652  |
| O                                           | -0.790921 | 1.314333     | 2.732912  |
| Total energy                                |           | -1735.888995 |           |
| Number of imaginary vibrational frequencies |           | 0            |           |

**Table S9.** Atom coordinates (Å), total energy (Hartree) and the number of imaginary vibrational frequencies for the geometry of **3a** optimized at the B3LYP/6-311++(d,p) level in the gas phase using Gaussian 09.

|   |           |           |           |
|---|-----------|-----------|-----------|
| O | -3.965899 | 3.826175  | 0.132703  |
| O | -4.720013 | 1.848936  | -0.787968 |
| O | 5.240895  | 0.745342  | 0.396867  |
| C | -5.143350 | 3.069642  | -0.171641 |
| H | -5.679098 | 2.841404  | 0.756610  |
| H | -5.763875 | 3.631081  | -0.869402 |
| C | -2.919538 | 2.948257  | 0.031378  |
| C | -1.611879 | 3.131488  | 0.325638  |
| H | -1.237005 | 4.063704  | 0.728198  |
| C | -0.708153 | 2.044169  | 0.071452  |
| C | 0.646576  | 2.208236  | 0.348263  |
| H | 0.992869  | 3.145486  | 0.765010  |
| C | 1.582778  | 1.209443  | 0.102409  |
| C | 2.972780  | 1.451459  | 0.379277  |
| C | 3.918627  | 0.483135  | 0.161079  |
| C | 3.503672  | -0.773799 | -0.391847 |
| C | 2.184277  | -1.040259 | -0.660410 |
| H | 1.908221  | -1.992415 | -1.073390 |
| C | 1.163984  | -0.074143 | -0.409546 |
| C | -0.228205 | -0.257621 | -0.655160 |
| C | -1.176665 | 0.786748  | -0.473189 |
| C | -2.574860 | 0.675512  | -0.791914 |
| H | -2.976939 | -0.195163 | -1.281534 |
| C | -3.381553 | 1.734395  | -0.526956 |
| C | 5.813776  | 0.075770  | 1.530328  |

|                                             |           |              |           |
|---------------------------------------------|-----------|--------------|-----------|
| H                                           | 5.284536  | 0.357999     | 2.445953  |
| H                                           | 6.848015  | 0.413397     | 1.587235  |
| H                                           | 5.787749  | -1.007602    | 1.397365  |
| C                                           | -1.939629 | -2.342645    | 0.314452  |
| C                                           | -3.241442 | -2.772938    | 0.081191  |
| C                                           | -1.390011 | -2.341702    | 1.594733  |
| C                                           | -4.012892 | -3.205208    | 1.159647  |
| C                                           | -2.171516 | -2.767698    | 2.664630  |
| H                                           | -0.369785 | -2.013449    | 1.754600  |
| C                                           | -3.481210 | -3.199168    | 2.447448  |
| H                                           | -1.757722 | -2.766089    | 3.666440  |
| H                                           | -4.085290 | -3.532162    | 3.283828  |
| O                                           | 3.304636  | 2.667821     | 0.916634  |
| O                                           | 4.518384  | -1.645176    | -0.620859 |
| C                                           | 4.121564  | 3.521780     | 0.098438  |
| H                                           | 4.258922  | 4.439304     | 0.669946  |
| H                                           | 5.088042  | 3.059484     | -0.105376 |
| H                                           | 3.608508  | 3.749999     | -0.841759 |
| C                                           | 4.209199  | -2.908322    | -1.210324 |
| H                                           | 5.161960  | -3.425309    | -1.308750 |
| H                                           | 3.535123  | -3.488874    | -0.573864 |
| H                                           | 3.755011  | -2.779776    | -2.196853 |
| S                                           | -0.904840 | -1.895878    | -1.108697 |
| O                                           | 0.159206  | -2.908445    | -1.169587 |
| O                                           | -1.791499 | -1.759097    | -2.273386 |
| H                                           | -3.636693 | -2.767332    | -0.927078 |
| H                                           | -5.028762 | -3.543261    | 0.990492  |
| Total energy                                |           | -1851.635463 |           |
| Number of imaginary vibrational frequencies |           | 0            |           |

**Table S10.** Atom coordinates (Å), total energy (Hartree) and the number of imaginary vibrational frequencies for the geometry of **3b** optimized at the B3LYP/6-311++(d,p) level in the gas phase using Gaussian 09.

|   |           |           |           |
|---|-----------|-----------|-----------|
| O | -2.125453 | 4.992187  | 0.306522  |
| O | -3.251973 | 3.480356  | -1.024523 |
| O | 5.782054  | -0.622815 | 0.814117  |
| C | -3.409469 | 4.665984  | -0.237968 |
| H | -4.112046 | 4.469199  | 0.579540  |
| H | -3.749191 | 5.481024  | -0.876319 |
| C | -1.352684 | 3.873692  | 0.141371  |
| C | -0.097182 | 3.624301  | 0.578792  |
| H | 0.457314  | 4.337185  | 1.175419  |
| C | 0.504645  | 2.372236  | 0.212987  |
| C | 1.802604  | 2.094556  | 0.633225  |

|   |           |           |           |
|---|-----------|-----------|-----------|
| H | 2.329677  | 2.819271  | 1.240712  |
| C | 2.458459  | 0.915665  | 0.294423  |
| C | 3.811665  | 0.701858  | 0.729815  |
| C | 4.481069  | -0.455154 | 0.424322  |
| C | 3.819822  | -1.442621 | -0.379121 |
| C | 2.525821  | -1.273551 | -0.804348 |
| H | 2.058068  | -2.032110 | -1.403774 |
| C | 1.780885  | -0.101864 | -0.473812 |
| C | 0.437490  | 0.163383  | -0.870244 |
| C | -0.208519 | 1.399438  | -0.589052 |
| C | -1.526302 | 1.748382  | -1.048151 |
| H | -2.075318 | 1.114547  | -1.723582 |
| C | -2.044231 | 2.943911  | -0.668280 |
| C | 5.999221  | -1.588029 | 1.854417  |
| H | 5.458540  | -1.298113 | 2.760896  |
| H | 7.070864  | -1.582053 | 2.050546  |
| H | 5.690580  | -2.584651 | 1.532477  |
| C | -1.854400 | -1.474052 | -0.397156 |
| C | -1.449723 | -1.875119 | 0.898515  |
| C | -4.180583 | -1.761138 | 0.185082  |
| C | -2.405225 | -2.205171 | 1.825017  |
| H | -0.397013 | -1.919250 | 1.149652  |
| C | -3.789261 | -2.159742 | 1.501821  |
| H | -2.110539 | -2.511368 | 2.823117  |
| O | -1.274312 | -0.579706 | -2.831713 |
| S | -0.593299 | -1.131540 | -1.651473 |
| O | 4.386536  | 1.677848  | 1.501599  |
| O | 4.582626  | -2.525629 | -0.673435 |
| C | 5.500577  | 2.373144  | 0.917085  |
| H | 5.805860  | 3.117850  | 1.651642  |
| H | 6.324860  | 1.688775  | 0.713057  |
| H | 5.192467  | 2.875021  | -0.006208 |
| C | 4.028765  | -3.537784 | -1.514302 |
| H | 4.813573  | -4.283105 | -1.629769 |
| H | 3.146473  | -3.995154 | -1.057063 |
| H | 3.759122  | -3.130041 | -2.492640 |
| C | -4.797111 | -2.497065 | 2.440795  |
| C | -6.126880 | -2.443906 | 2.094140  |
| H | -6.887468 | -2.705528 | 2.821110  |
| C | -6.512656 | -2.050670 | 0.791513  |
| H | -7.564506 | -2.014543 | 0.531965  |
| H | -4.502650 | -2.799844 | 3.440117  |
| C | -3.175356 | -1.419242 | -0.757506 |
| H | -3.451219 | -1.116445 | -1.760958 |
| C | -5.560456 | -1.716623 | -0.141972 |
| H | -5.851538 | -1.414918 | -1.142364 |
| O | 0.165642  | -2.379742 | -1.817872 |

|                                             |              |
|---------------------------------------------|--------------|
| Total energy                                | -2005.313792 |
| Number of imaginary vibrational frequencies | 0            |

**Table S11.** Atom coordinates (Å), total energy (Hartree) and the number of imaginary vibrational frequencies for the geometry of **3c** optimized at the B3LYP/6-311++(d,p) level in the gas phase using Gaussian 09.

|   |           |           |           |
|---|-----------|-----------|-----------|
| O | 6,211543  | -0,913240 | -0,872759 |
| O | 5,146462  | -2,226017 | 0,699522  |
| C | 6,280447  | -2,160832 | -0,169666 |
| H | 6,235882  | -2,985681 | -0,889274 |
| H | 7,194123  | -2,191035 | 0,423537  |
| C | 4,946126  | -0,435650 | -0,668694 |
| C | 4,338393  | 0,645583  | -1,206885 |
| H | 4,831734  | 1,283430  | -1,929040 |
| C | 3,002257  | 0,950224  | -0,774103 |
| C | 2,360710  | 2,066083  | -1,300719 |
| H | 2,880212  | 2,663933  | -2,043360 |
| C | 1,088809  | 2,461738  | -0,896384 |
| C | 0,491427  | 3,640068  | -1,440009 |
| C | -0,737034 | 4,063339  | -1,038574 |
| C | -1,434375 | 3,323216  | -0,042129 |
| C | -0,903595 | 2,175615  | 0,499391  |
| H | -1,428663 | 1,668529  | 1,289177  |
| C | 0,373254  | 1,685719  | 0,083301  |
| C | 0,990147  | 0,495270  | 0,569790  |
| C | 2,311477  | 0,118211  | 0,198745  |
| C | 3,029090  | -1,008121 | 0,736451  |
| H | 2,584664  | -1,649776 | 1,477410  |
| C | 4,289584  | -1,240012 | 0,291479  |
| C | -1,379500 | -1,097284 | 0,454885  |
| C | -2,674758 | -1,040220 | 0,900091  |
| C | -1,049909 | -1,630802 | -0,812717 |
| C | -2,054185 | -2,081946 | -1,630593 |
| C | -3,413996 | -2,035726 | -1,219026 |
| C | -3,728809 | -1,510266 | 0,073695  |
| C | -5,084571 | -1,473255 | 0,491972  |
| C | -6,085151 | -1,929483 | -0,332586 |
| C | -5,775093 | -2,443823 | -1,613256 |
| C | -4,470867 | -2,496344 | -2,045369 |
| H | -5,318748 | -1,082449 | 1,476541  |
| H | -7,117530 | -1,898152 | -0,003435 |
| H | -6,573677 | -2,800040 | -2,254101 |
| H | -4,233802 | -2,893216 | -3,026807 |
| H | -1,816078 | -2,485921 | -2,608756 |

|                                             |           |              |           |
|---------------------------------------------|-----------|--------------|-----------|
| H                                           | -0,015524 | -1,676899    | -1,130561 |
| H                                           | -2,891775 | -0,637544    | 1,882875  |
| O                                           | -2,628905 | 3,862105     | 0,316396  |
| C                                           | -3,397393 | 3,211802     | 1,325298  |
| H                                           | -4,291696 | 3,819337     | 1,451464  |
| H                                           | -3,680486 | 2,201675     | 1,013357  |
| H                                           | -2,848456 | 3,163083     | 2,270568  |
| H                                           | 1,047943  | 4,200892     | -2,183175 |
| H                                           | -1,198411 | 4,958007     | -1,437814 |
| S                                           | -0,057796 | -0,602333    | 1,591709  |
| O                                           | -0,675717 | 0,169991     | 2,680448  |
| O                                           | 0,657881  | -1,835274    | 1,944860  |
| Total energy                                |           | -1776.213135 |           |
| Number of imaginary vibrational frequencies |           | 0            |           |

**Table S12.** Atom coordinates (Å), total energy (Hartree) and the number of imaginary vibrational frequencies for the geometry of **3d** optimized at the B3LYP/6-311++(d,p) level in the gas phase using Gaussian 09.

|   |           |           |           |
|---|-----------|-----------|-----------|
| O | 6.013494  | -0.097729 | -1.094753 |
| O | 5.264964  | -1.727096 | 0.358736  |
| O | -3.419785 | 3.008559  | 0.755448  |
| O | -2.586324 | 4.540939  | -0.755090 |
| C | 6.317156  | -1.388185 | -0.547374 |
| H | 6.353548  | -2.125041 | -1.357495 |
| H | 7.260947  | -1.336922 | -0.005074 |
| C | 4.702018  | 0.140135  | -0.788587 |
| C | 3.899379  | 1.156125  | -1.179370 |
| H | 4.242451  | 1.937117  | -1.845774 |
| C | 2.557807  | 1.188114  | -0.665808 |
| C | 1.715953  | 2.227285  | -1.048972 |
| H | 2.095504  | 2.974087  | -1.739272 |
| C | 0.414596  | 2.362224  | -0.573154 |
| C | -0.376789 | 3.483100  | -0.997628 |
| C | -1.629969 | 3.595156  | -0.500007 |
| C | -2.140565 | 2.651457  | 0.419895  |
| C | -1.438142 | 1.576590  | 0.857997  |
| H | -1.860705 | 0.928748  | 1.606807  |
| C | -0.107744 | 1.376018  | 0.348232  |
| C | 0.724986  | 0.274749  | 0.694110  |
| C | 2.066923  | 0.158739  | 0.234708  |
| C | 2.983908  | -0.885510 | 0.613517  |
| H | 2.688257  | -1.667004 | 1.291688  |

|                                             |           |              |           |
|---------------------------------------------|-----------|--------------|-----------|
| C                                           | 4.238108  | -0.858421    | 0.098299  |
| C                                           | -1.343979 | -1.694153    | 0.561870  |
| C                                           | -2.640447 | -1.829101    | 1.037386  |
| C                                           | -1.003962 | -2.137056    | -0.719737 |
| C                                           | -3.622781 | -2.401870    | 0.228933  |
| C                                           | -1.976110 | -2.697002    | -1.528569 |
| H                                           | 0.012634  | -2.042412    | -1.082618 |
| C                                           | -3.292350 | -2.833511    | -1.058946 |
| H                                           | -1.743642 | -3.042630    | -2.528272 |
| H                                           | -2.883359 | -1.490268    | 2.036946  |
| H                                           | -4.628688 | -2.501507    | 0.612662  |
| H                                           | 0.033788  | 4.206197     | -1.690677 |
| C                                           | -3.625528 | 4.313305     | 0.204919  |
| H                                           | -3.552966 | 5.061071     | 1.002645  |
| H                                           | -4.592887 | 4.347517     | -0.295116 |
| O                                           | -4.169511 | -3.396079    | -1.930625 |
| C                                           | -5.523286 | -3.571770    | -1.525832 |
| H                                           | -5.997248 | -2.611777    | -1.296799 |
| H                                           | -6.027703 | -4.030881    | -2.373973 |
| H                                           | -5.595620 | -4.234614    | -0.657531 |
| S                                           | -0.067125 | -1.064339    | 1.670734  |
| O                                           | 0.873554  | -2.168387    | 1.899971  |
| O                                           | -0.742070 | -0.482802    | 2.840666  |
| Total energy                                |           | -1811.117786 |           |
| Number of imaginary vibrational frequencies |           | 0            |           |

## References

1. Bałczewski, P.; Kowalska, E.; Różycka-Sokołowska, E.; Skalik, J.; Owsianik, K.; Koprowski, M.; Marciniak, B.; Guziejewski, D.; Ciesielski, W. Mono-Aryl/Alkylthio-Substituted (Hetero)acenes of Exceptional Thermal and Photochemical Stability by the Thio-Friedel–Crafts/Bradsher Cyclization Reaction. *Chem. Eur. J.* **2019**, *25*, 14148-14161. DOI: 10.1002/chem.201903027
